# Supplementary material for: A Novel One-Pot and One-Step Microwave-Assisted Cyclization-Methylation Reaction of Amino Alcohols and Acetylated Derivatives with Dimethyl Carbonate and TBAC
Source: Hindawi journal article supplement (doi:10.1155/2014/634935), 2014-01-01
Supplement: f1 [file 634935.f1.zip]

## Supplementary Material

**A novel one-pot and one-step microwave-assisted cyclization-methylation reaction of amino alcohols and acetylated derivatives with dimethyl carbonate and TBAC**

Leticia Guerrero R.\*<sup>1</sup>, Adrián Ochoa-Terán<sup>2</sup>, Ignacio A. Rivero<sup>2</sup>

<sup>1</sup> *Área de Ciencias Básicas e Ingenierías. Universidad Autónoma de Nayarit. Cd. de la Cultura Amado Nervo S/N. Tepic, Nay. 63190. México*

<sup>2</sup> *Centro de Graduados e Investigación en Química. Instituto Tecnológico de Tijuana. Blvd. Alberto Limón Padilla S/N. Tijuana, B.C. 22510. México*

\* e-mail: [lguerrer@uan.edu.mx](mailto:lguerrer@uan.edu.mx)

S2-S17: <sup>1</sup>H NMR and <sup>13</sup>C NMR spectra

S18, S19: GC-MS and IR spectra

<sup>1</sup>H-NMR and <sup>13</sup>C-NMR spectra were recorded at 200 MHz and 50 MHz respectively, on a spectrometer in CDCl<sub>3</sub> with TMS as internal standard.

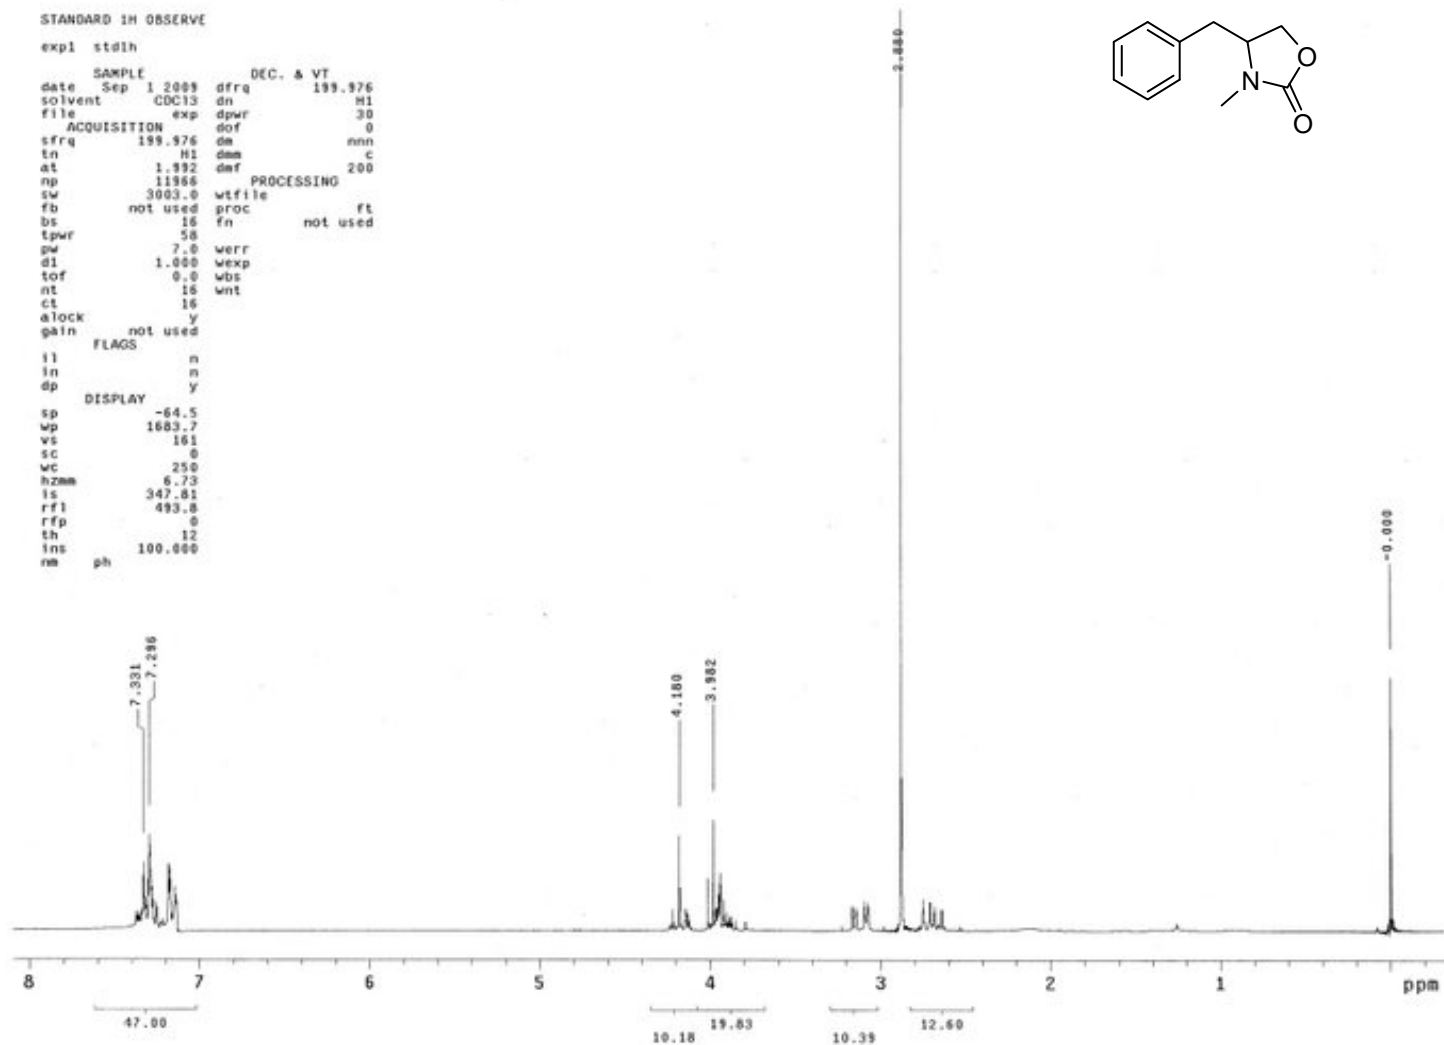

**Figure 1:**  $^1\text{H}$  NMR spectrum of 4-benzyl-3-methyloxazolidin-2-one (**5**)

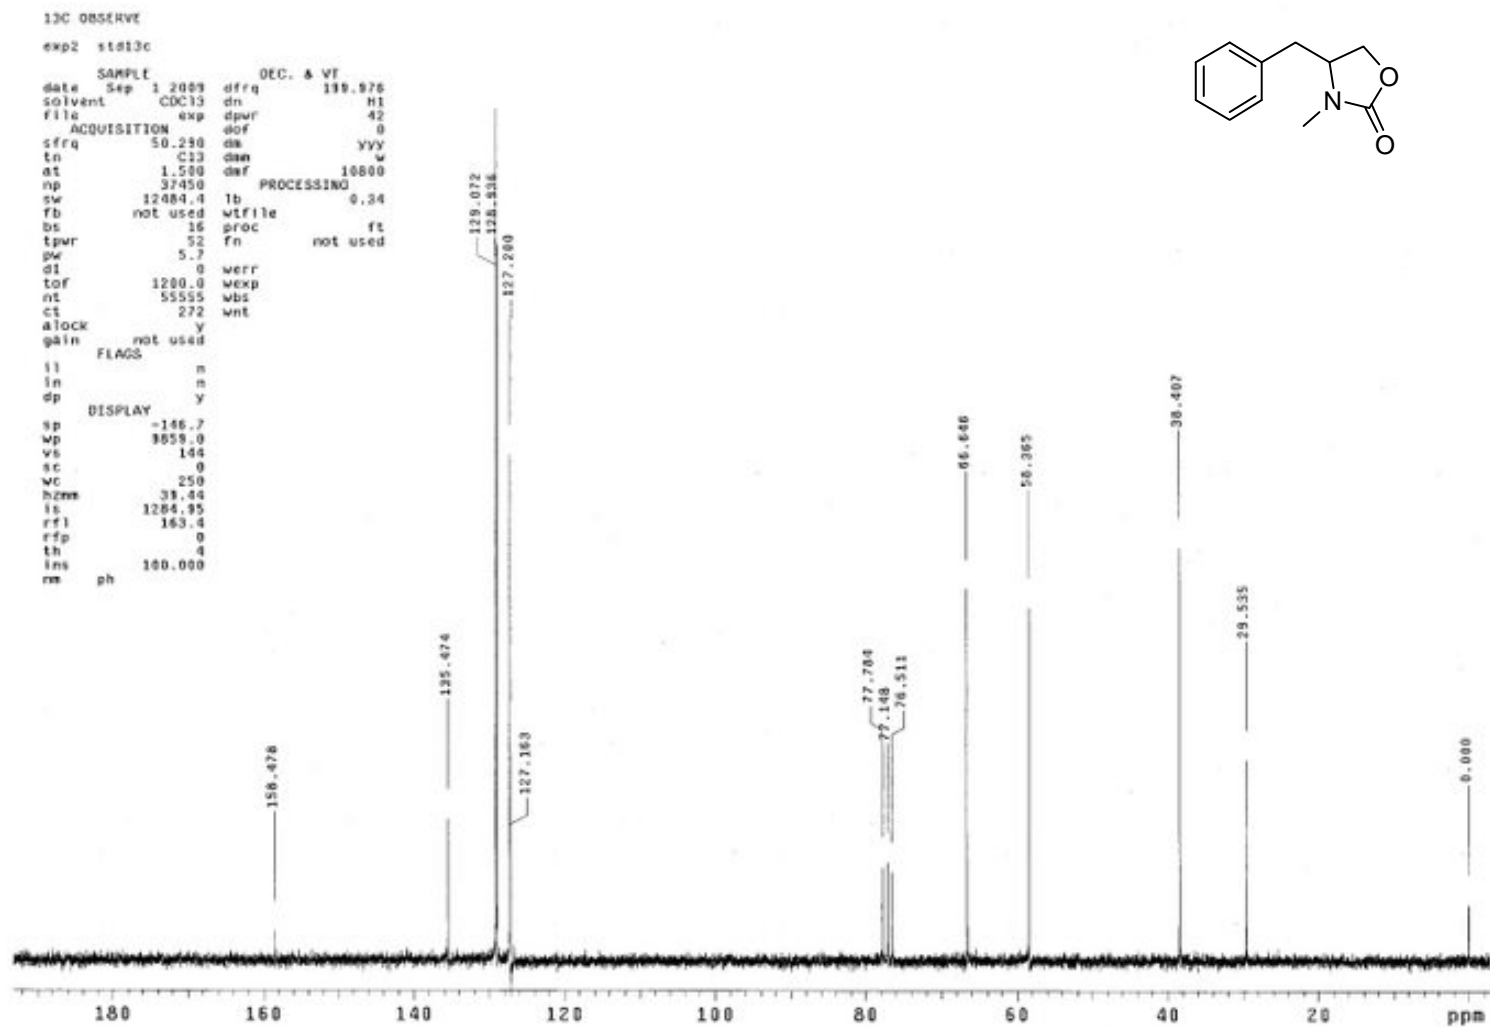

Figure 2:  $^{13}\text{C}$  NMR spectrum of 4-benzyl-3-methyloxazolidin-2-one (**5**)

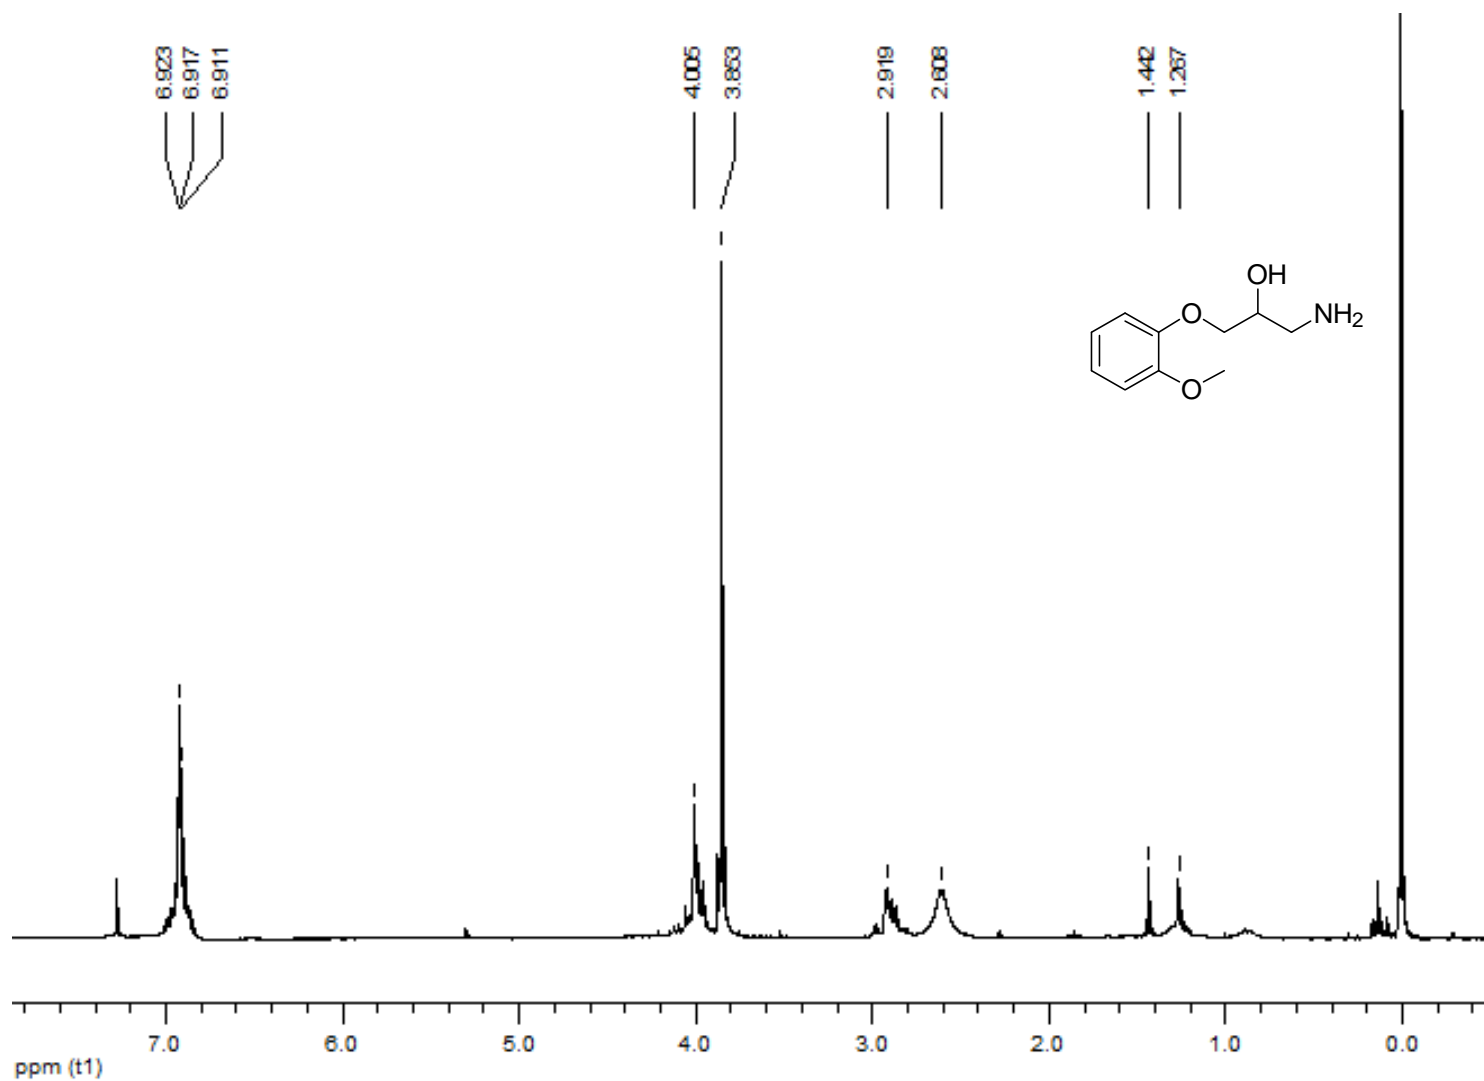

**Figure 3:**  $^1\text{H}$  NMR spectrum of 1-amino-3-(2-methoxyphenoxy)propan-2-ol (**14**)

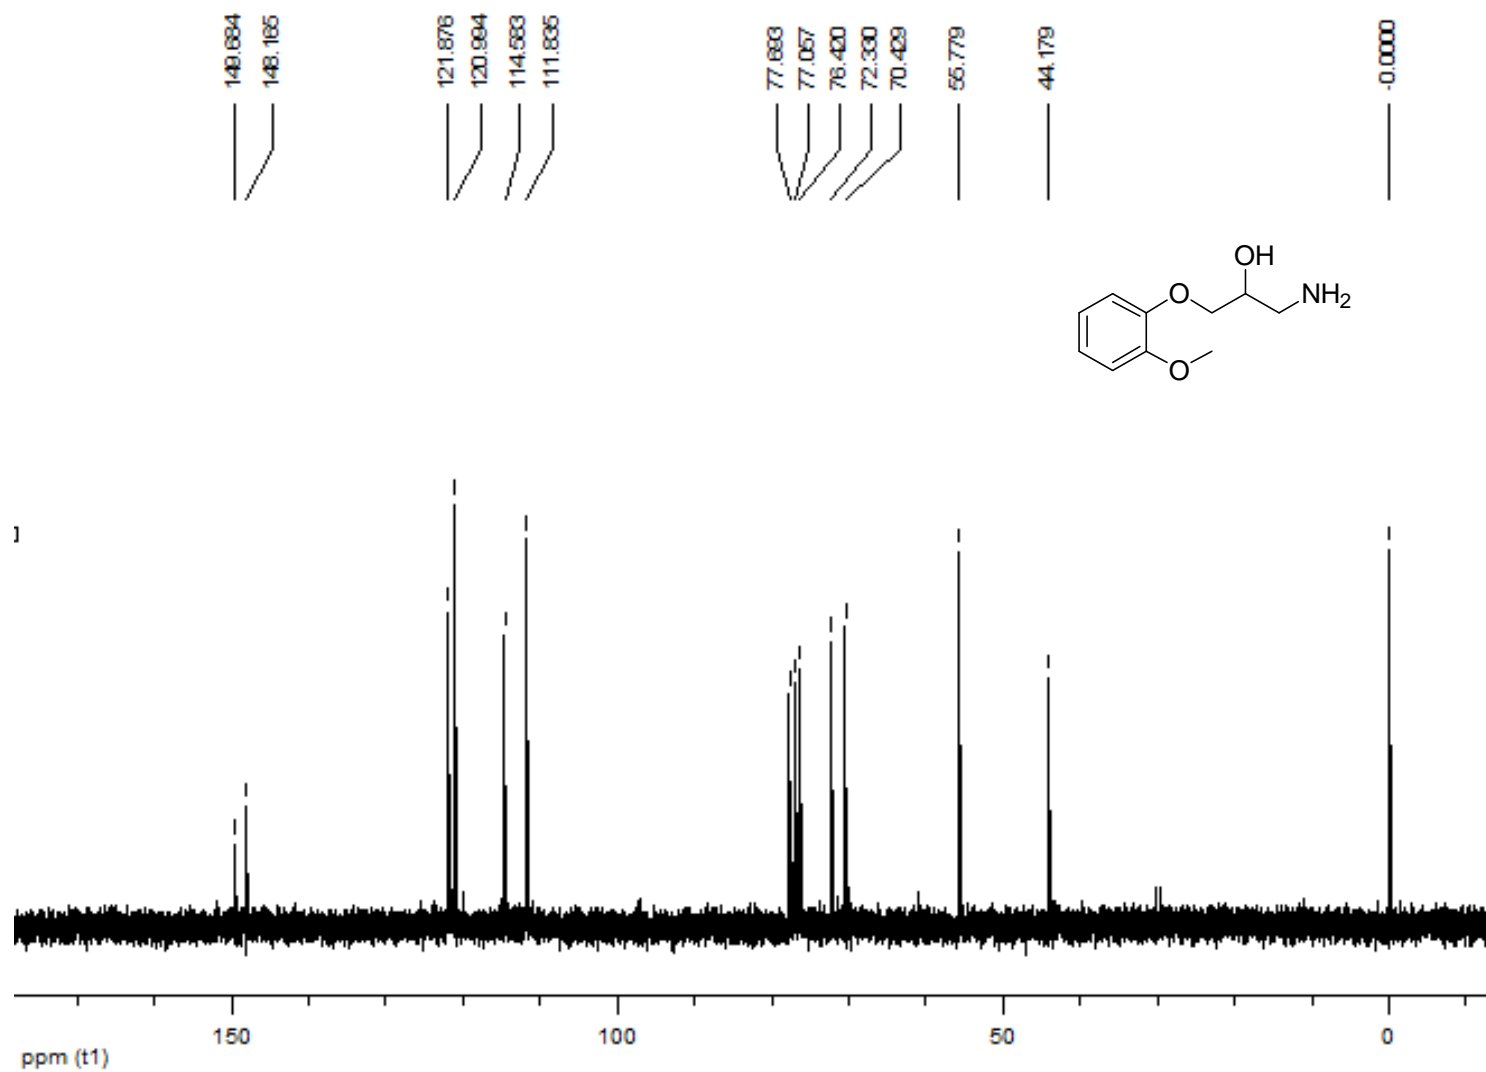

**Figure 4:** <sup>13</sup>C NMR spectrum of 1-amino-3-(2-methoxyphenoxy)propan-2-ol (**14**)

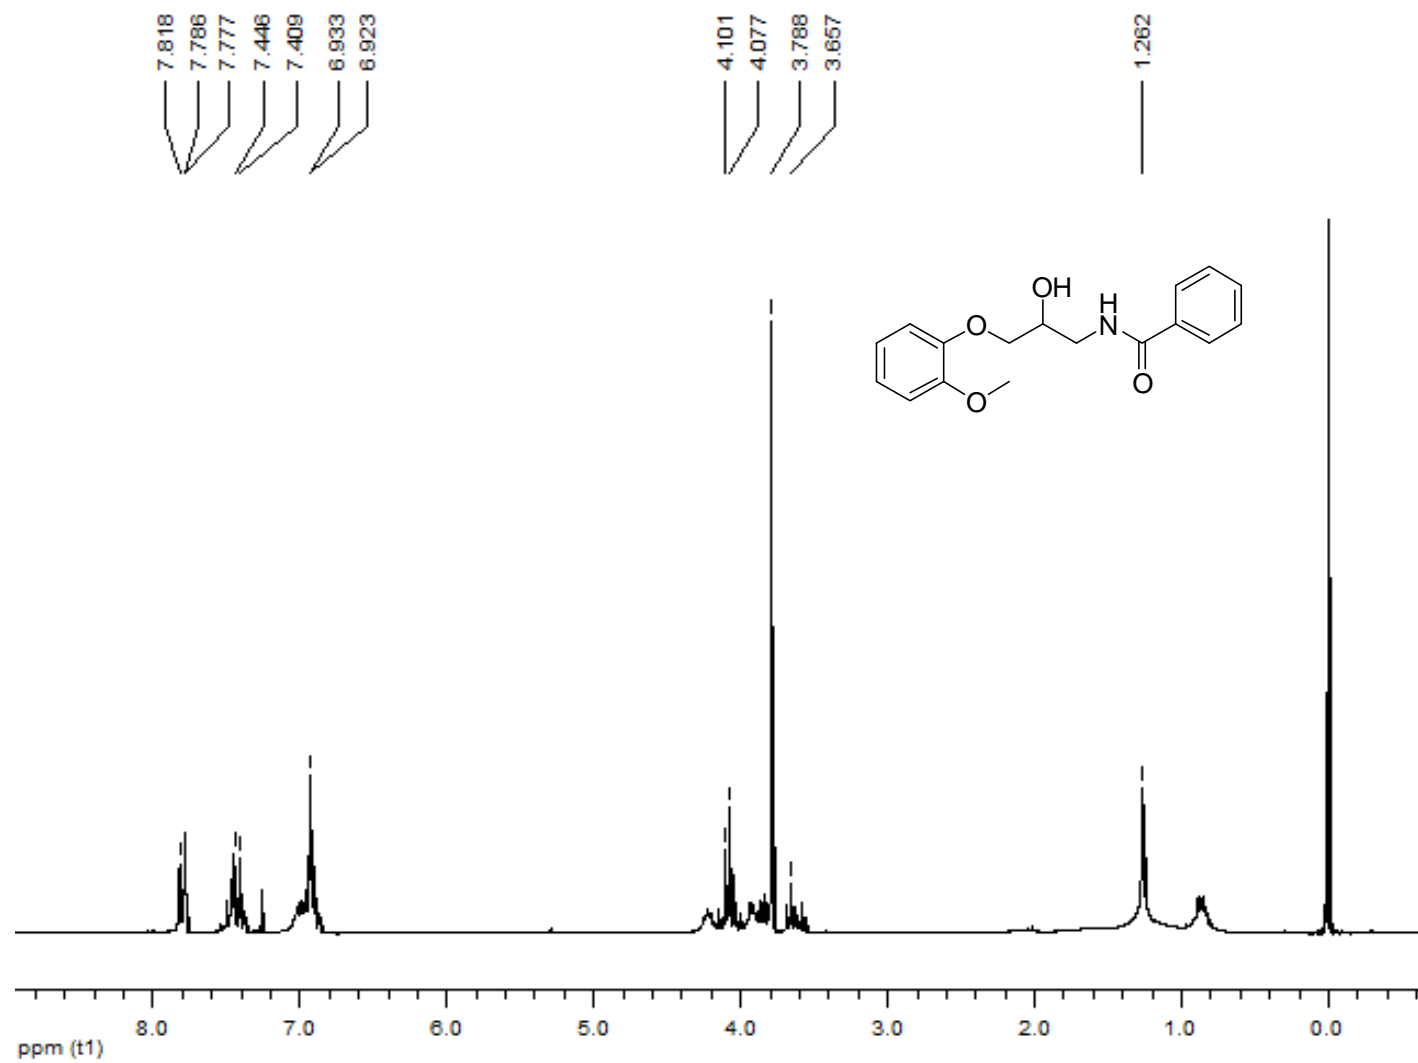

**Figure 5:**  $^1\text{H}$  NMR spectrum of *N*-(2-hydroxy-3-(2-methoxyphenoxy)propyl)benzamide (**15**)

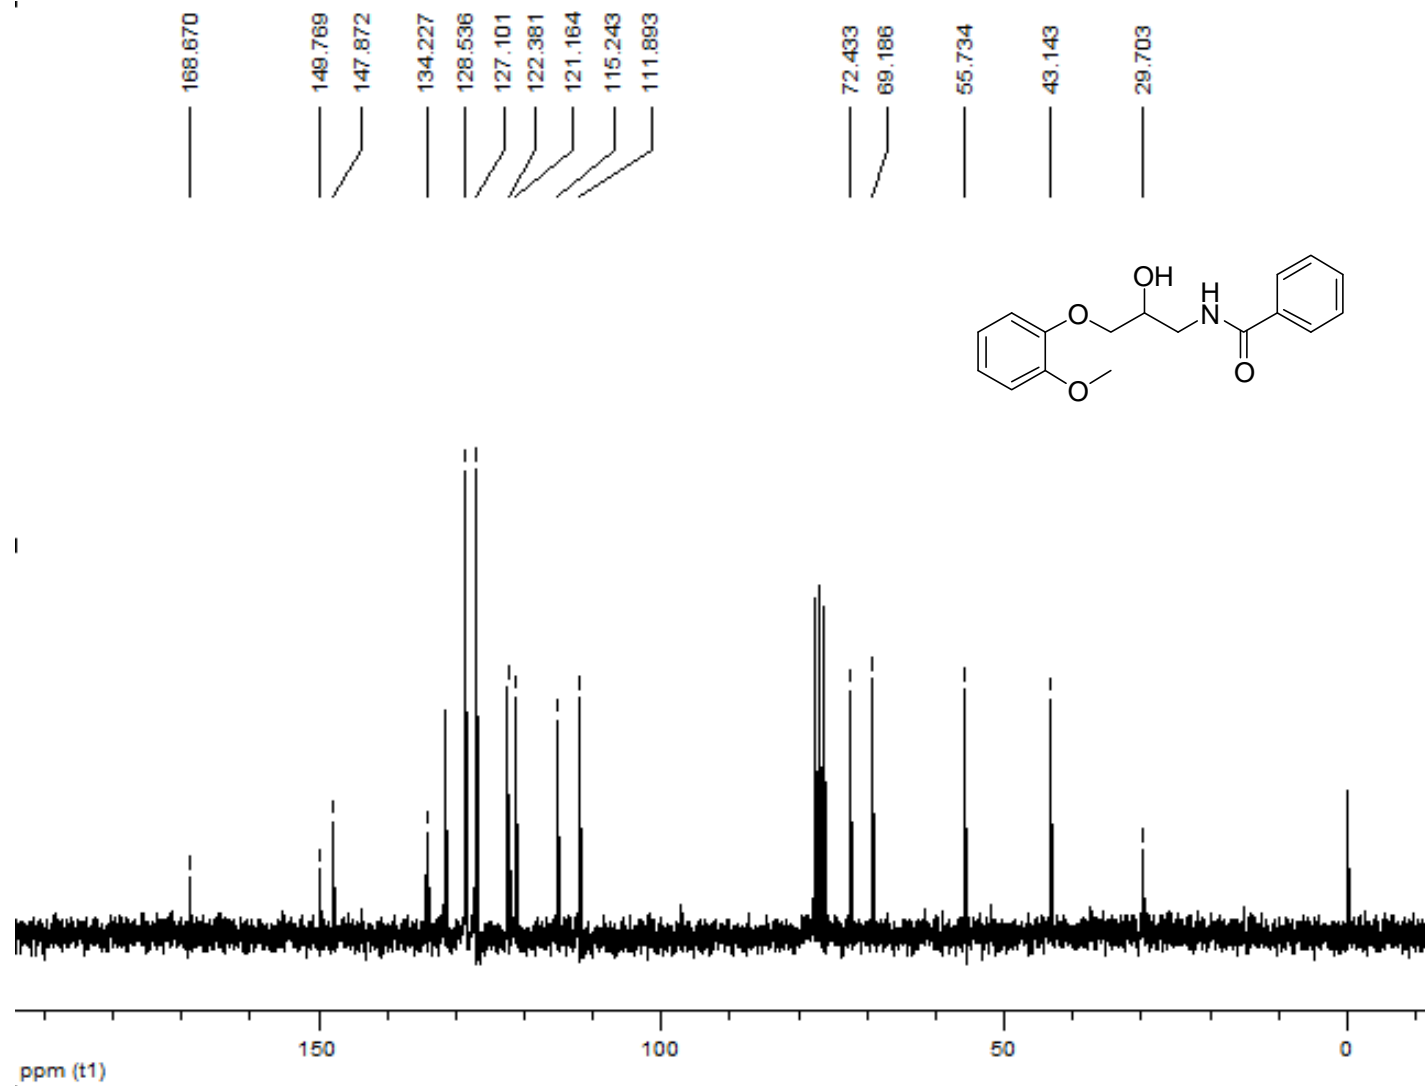

**Figure 6:** <sup>13</sup>C NMR spectrum of *N*-(2-hydroxy-3-(2-methoxyphenoxy)propyl)benzamide (**15**)

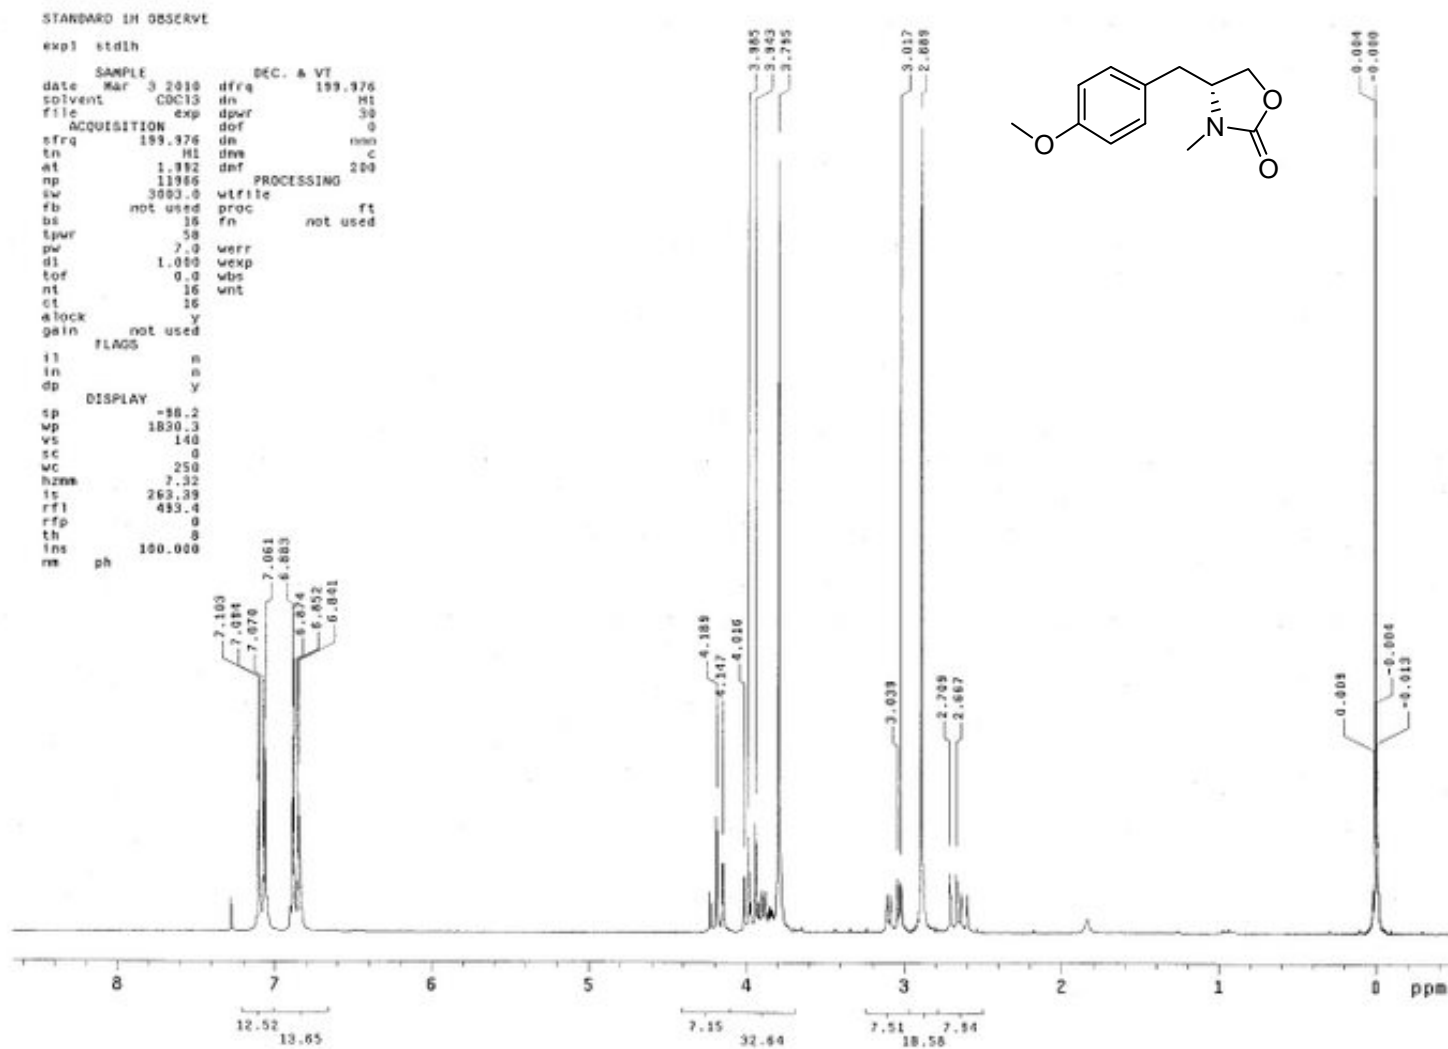

**Figure 7:**  $^1\text{H}$  NMR spectrum of (*R*)-4-(4-methoxybenzyl)-3-methyloxazolidin-2-one (**10**)



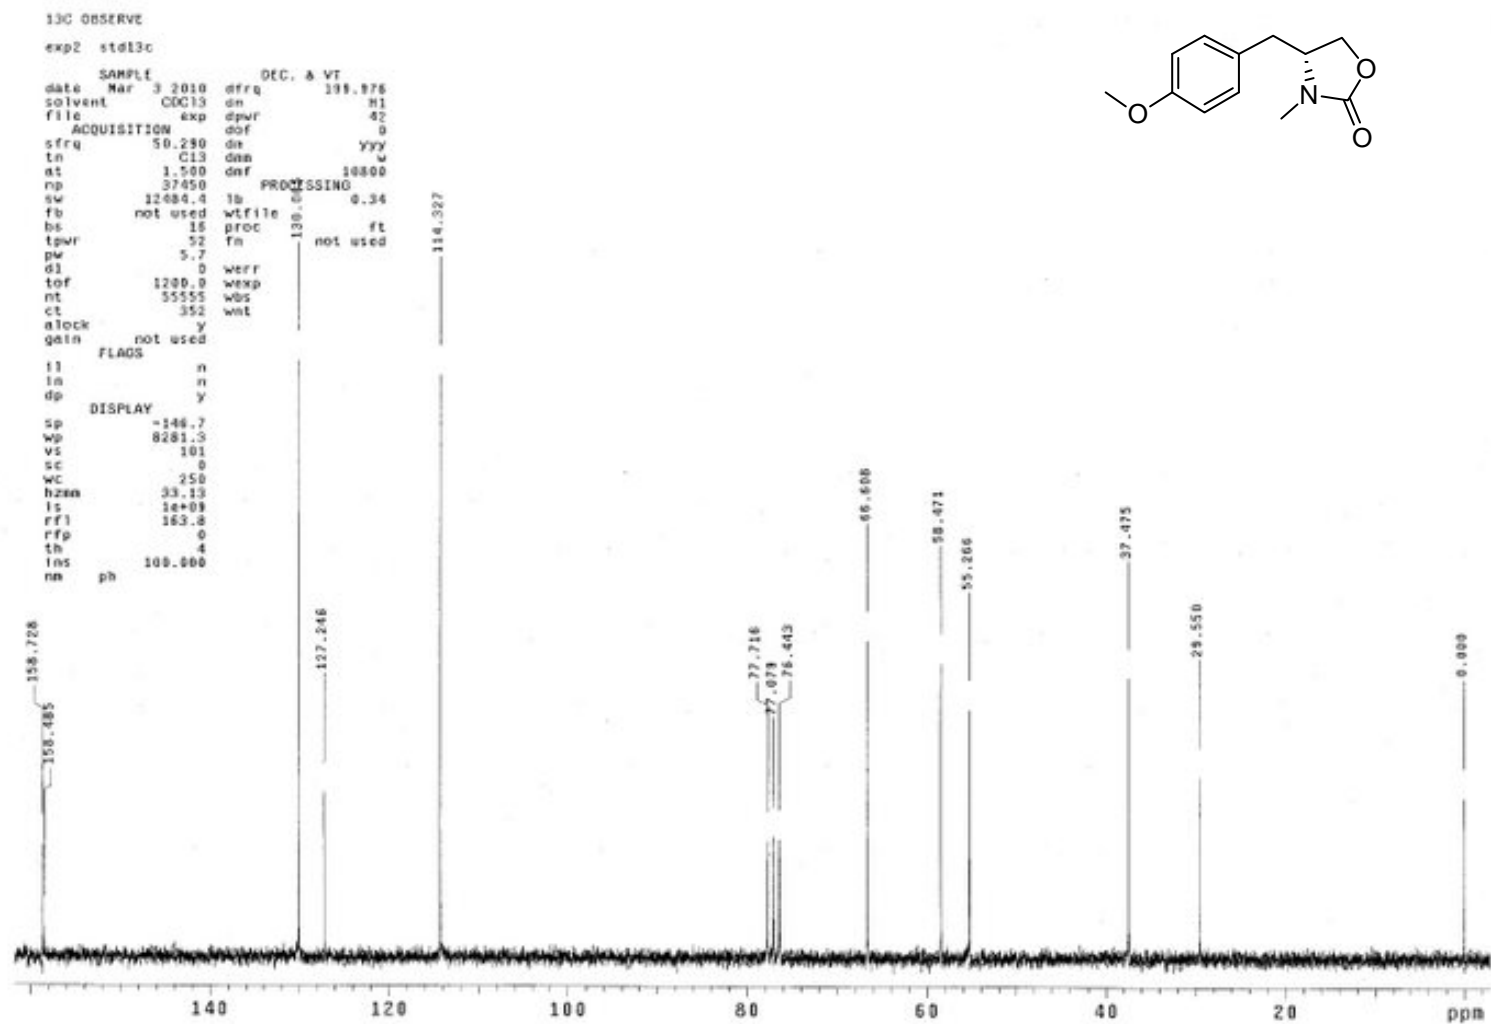

**Figure 8:**  $^{13}\text{C}$  NMR spectrum of (*R*)-4-(4-methoxybenzyl)-3-methyloxazolidin-2-one (**10**)



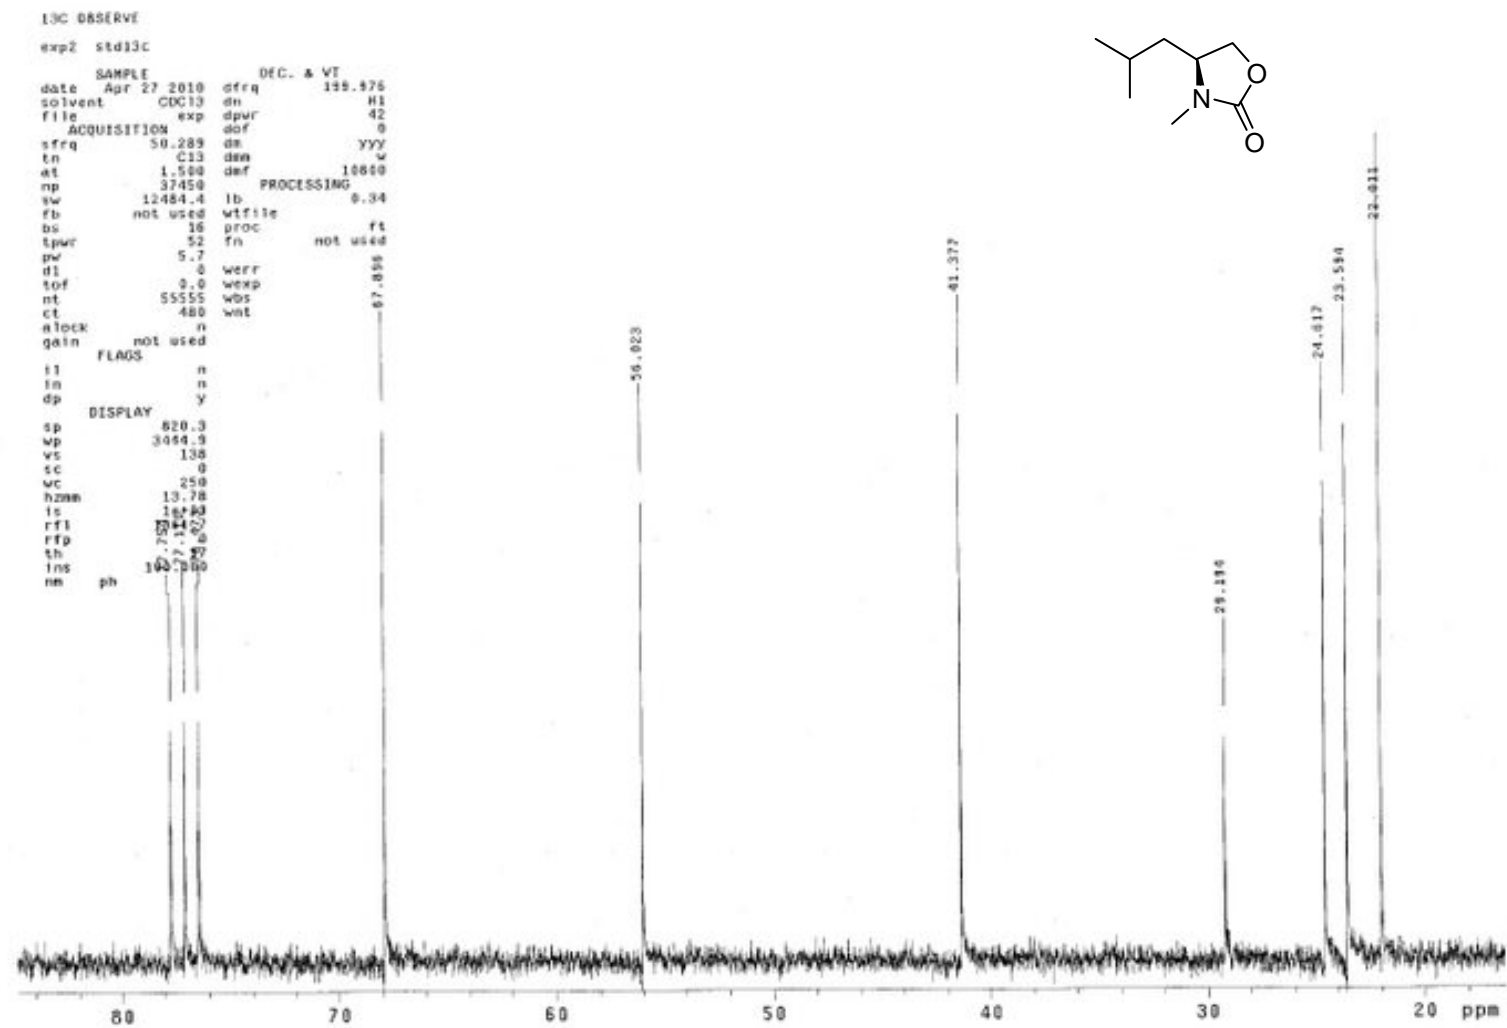

**Figure 10:**  $^{13}\text{C}$  NMR spectrum of (*S*)-4-isobutyl-3-methyloxazolidin-2-one (**11**)

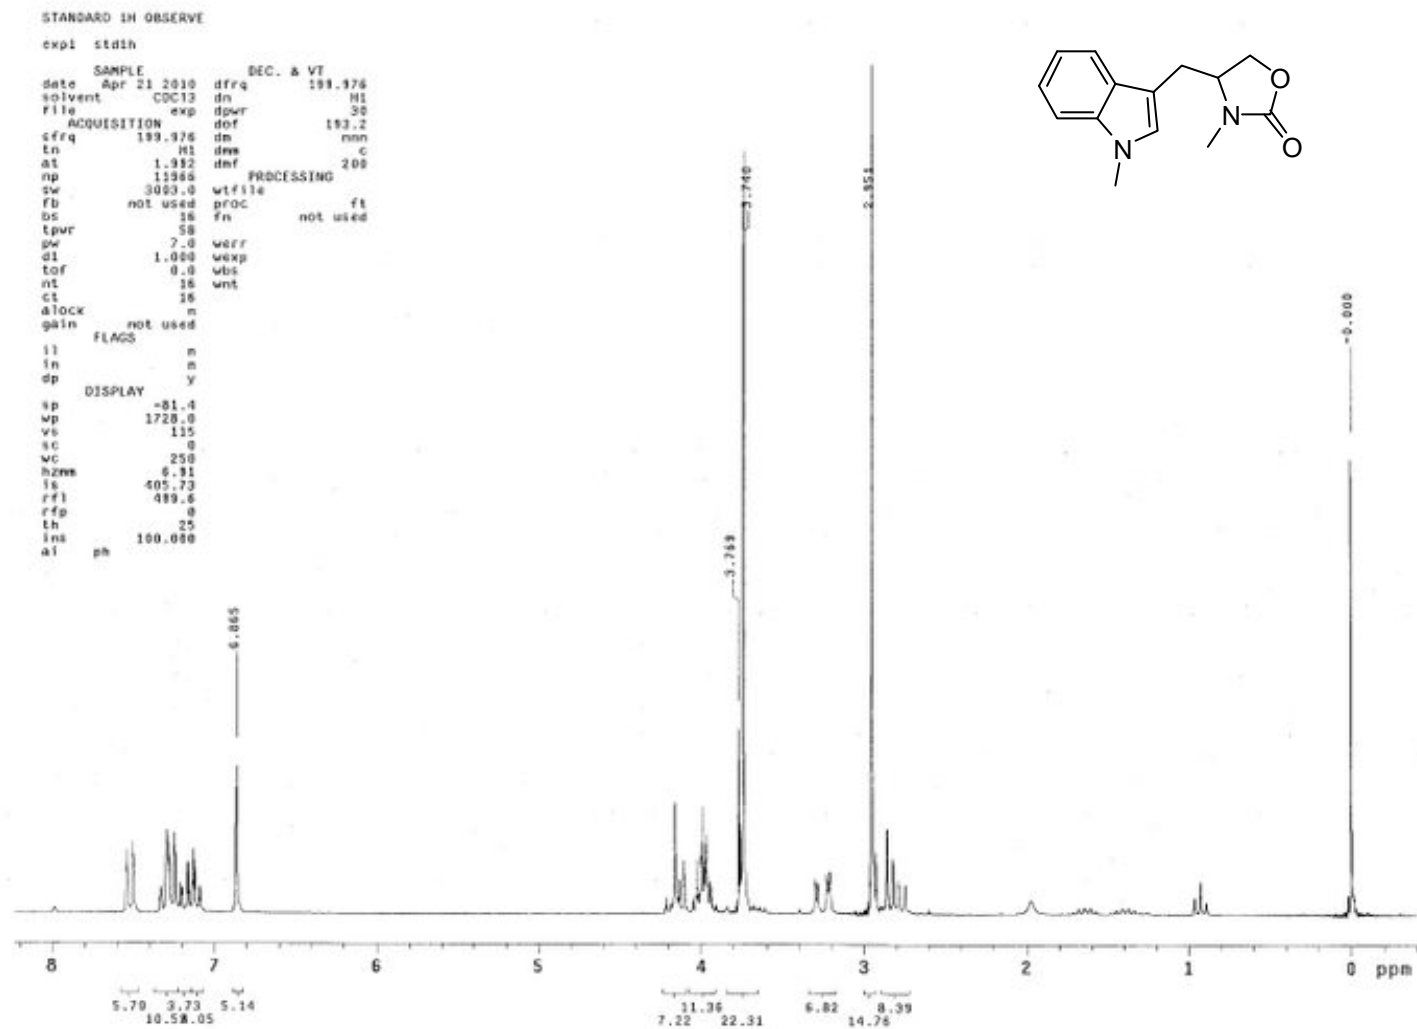

**Figure 11:**  $^1\text{H}$  NMR spectrum of 3-methyl-4-((1-methyl-1*H*-indol-3-yl)methyl)oxazolidin-2-one (**12**)

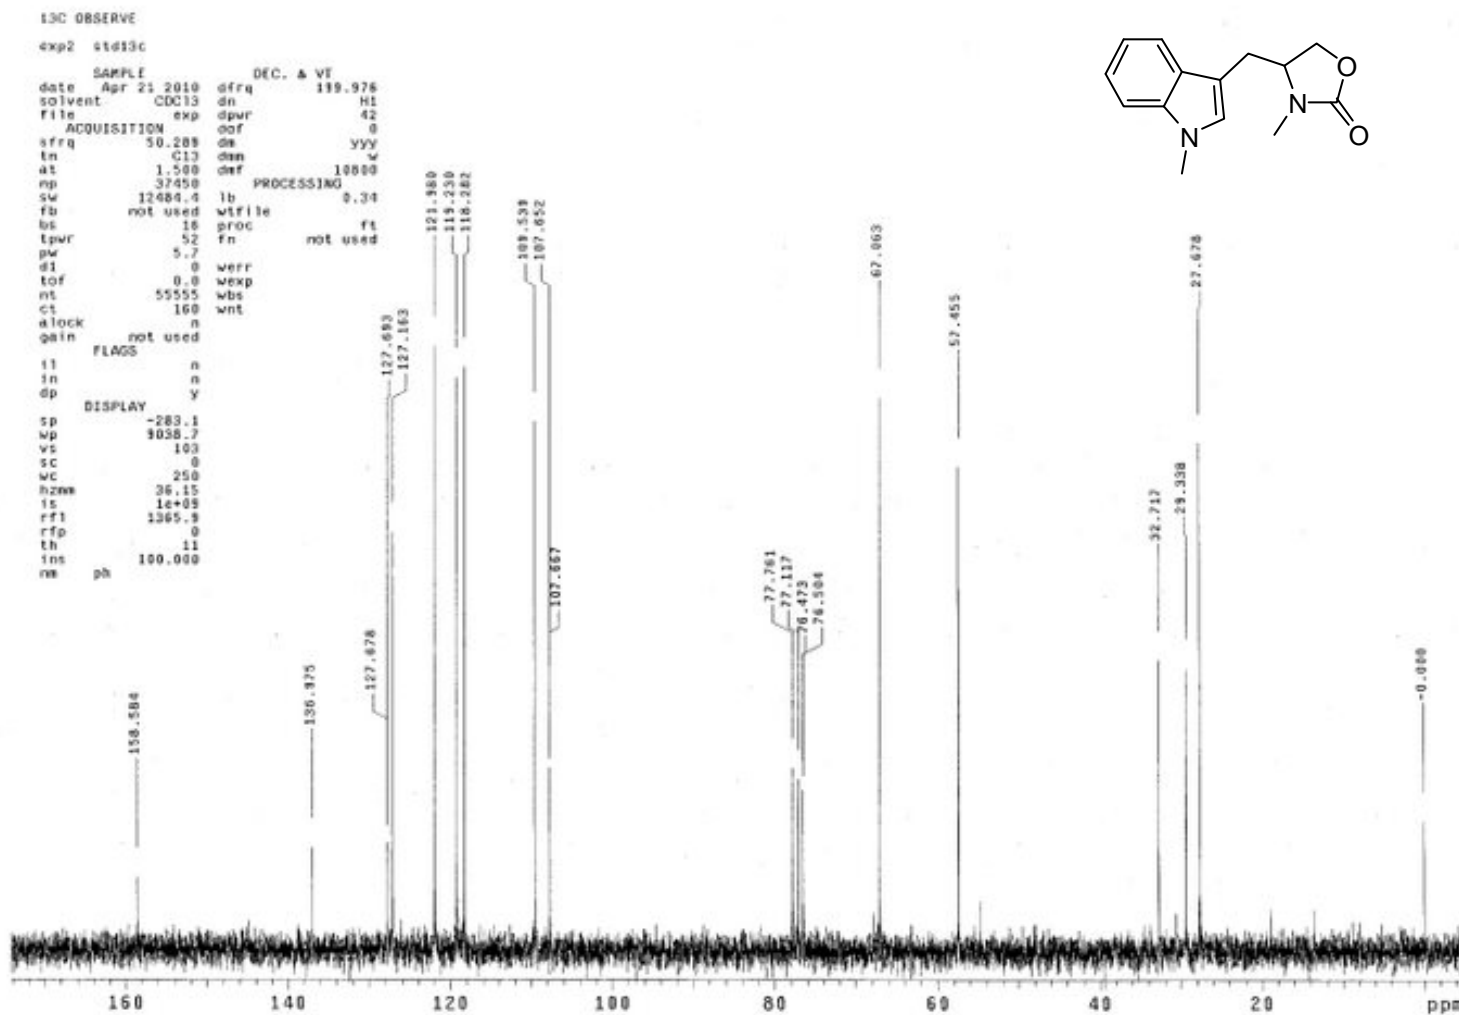

**Figure 12:**  $^{13}\text{C}$  NMR spectrum of 3-methyl-4-((1-methyl-1*H*-indol-3-yl)methyl)oxazolidin-2-one (**12**)

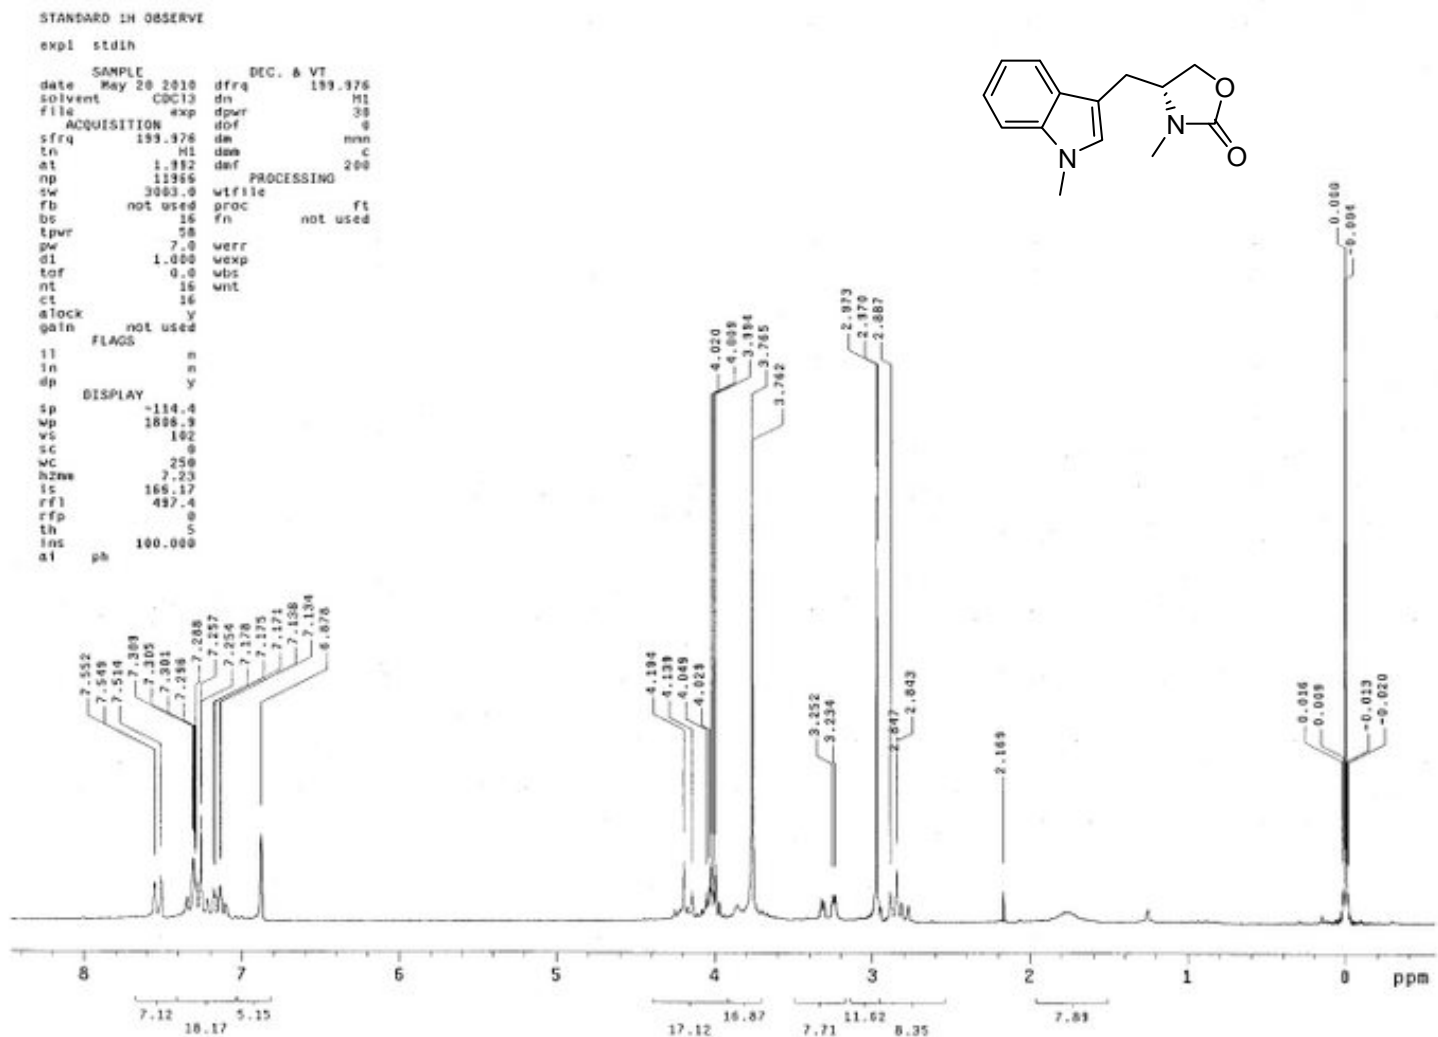

**Figure 13:**  $^1\text{H}$  NMR spectrum of (*R*)-3-methyl-4-((1-methyl-1*H*-indol-3-yl)methyl)oxazolidin-2-one (**13**)

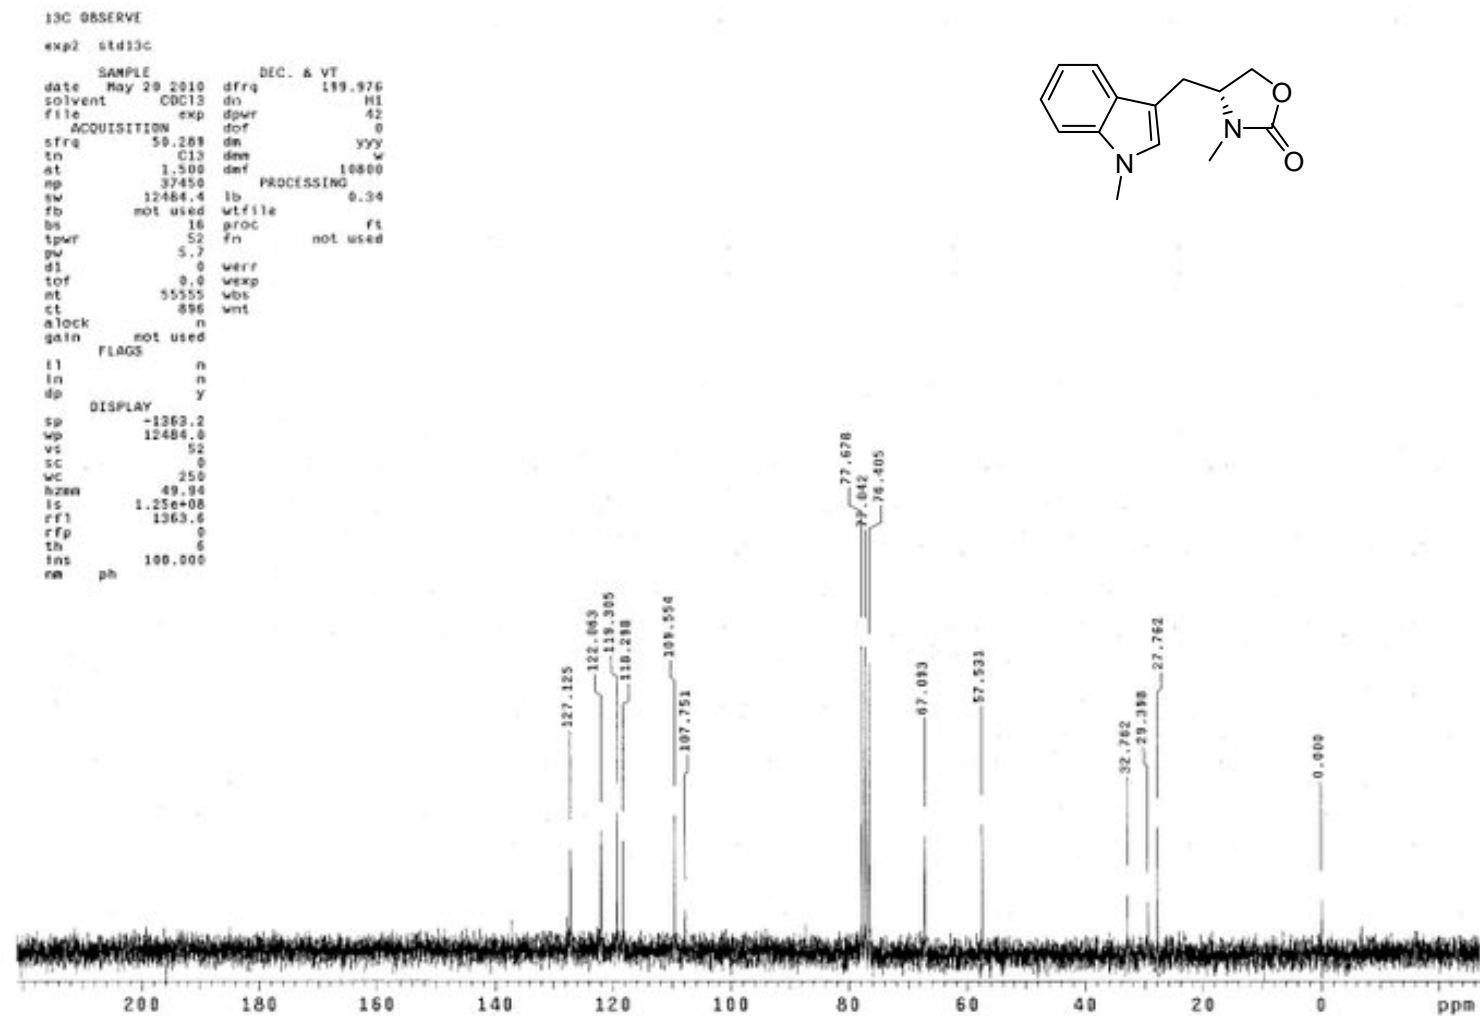

**Figure 14:**  $^{13}\text{C}$  NMR spectrum of (R)-3-methyl-4-((1-methyl-1H-indol-3-yl)methyl)oxazolidin-2-one (13)

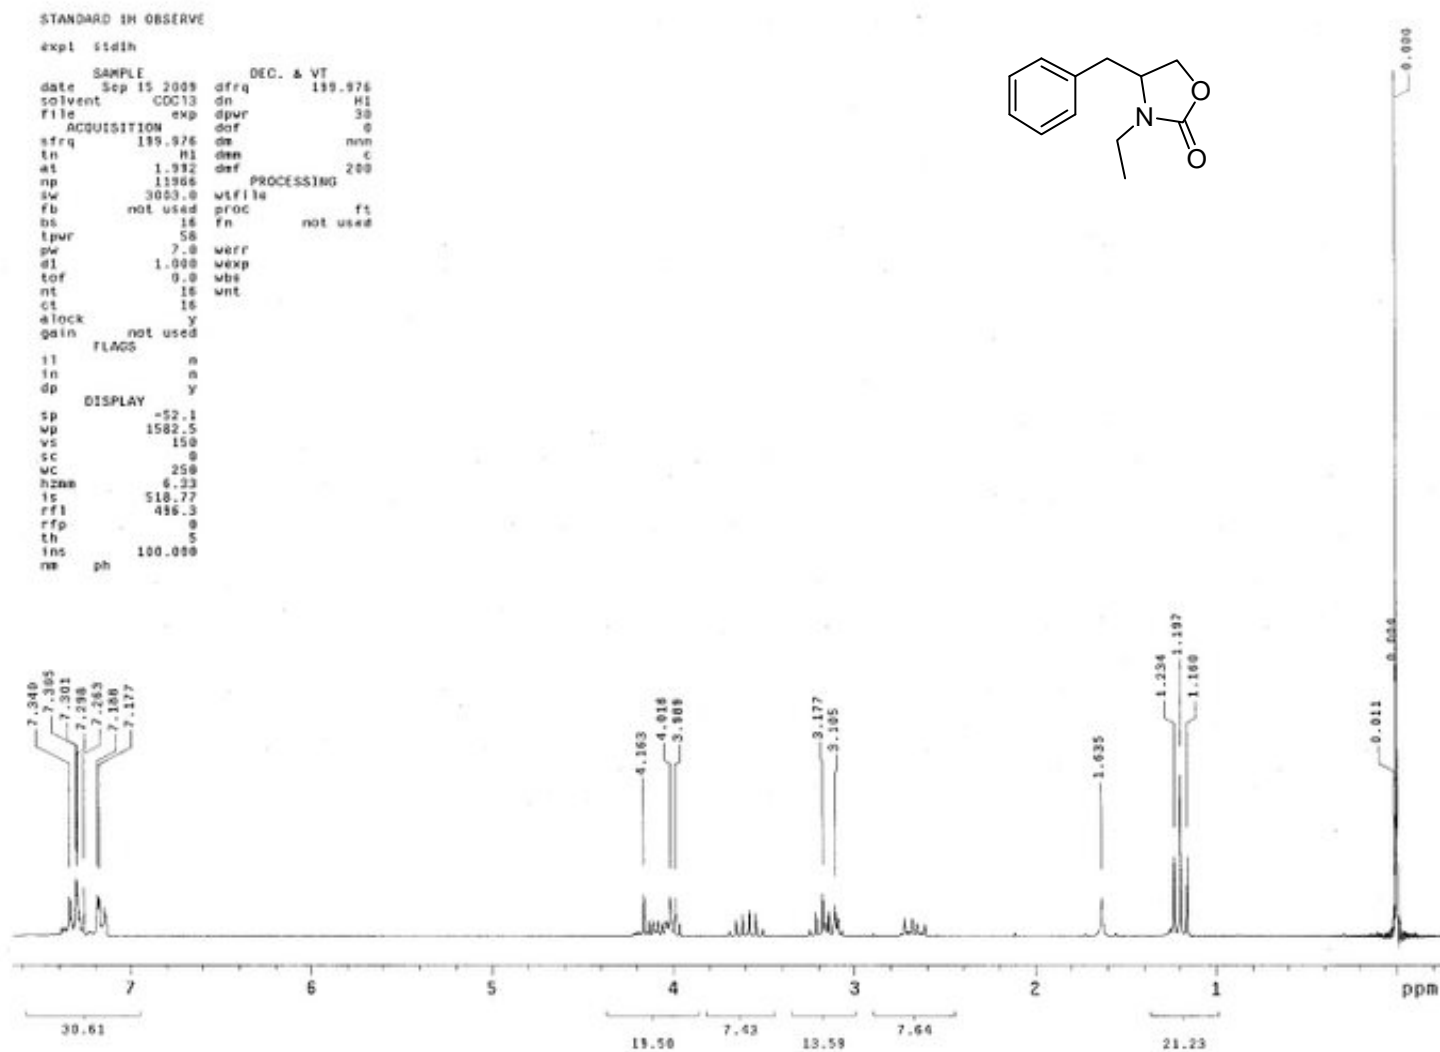

Figure 15:  $^1\text{H}$  NMR spectrum of 4-benzyl-3-ethyloxazolidin-2-one (17)



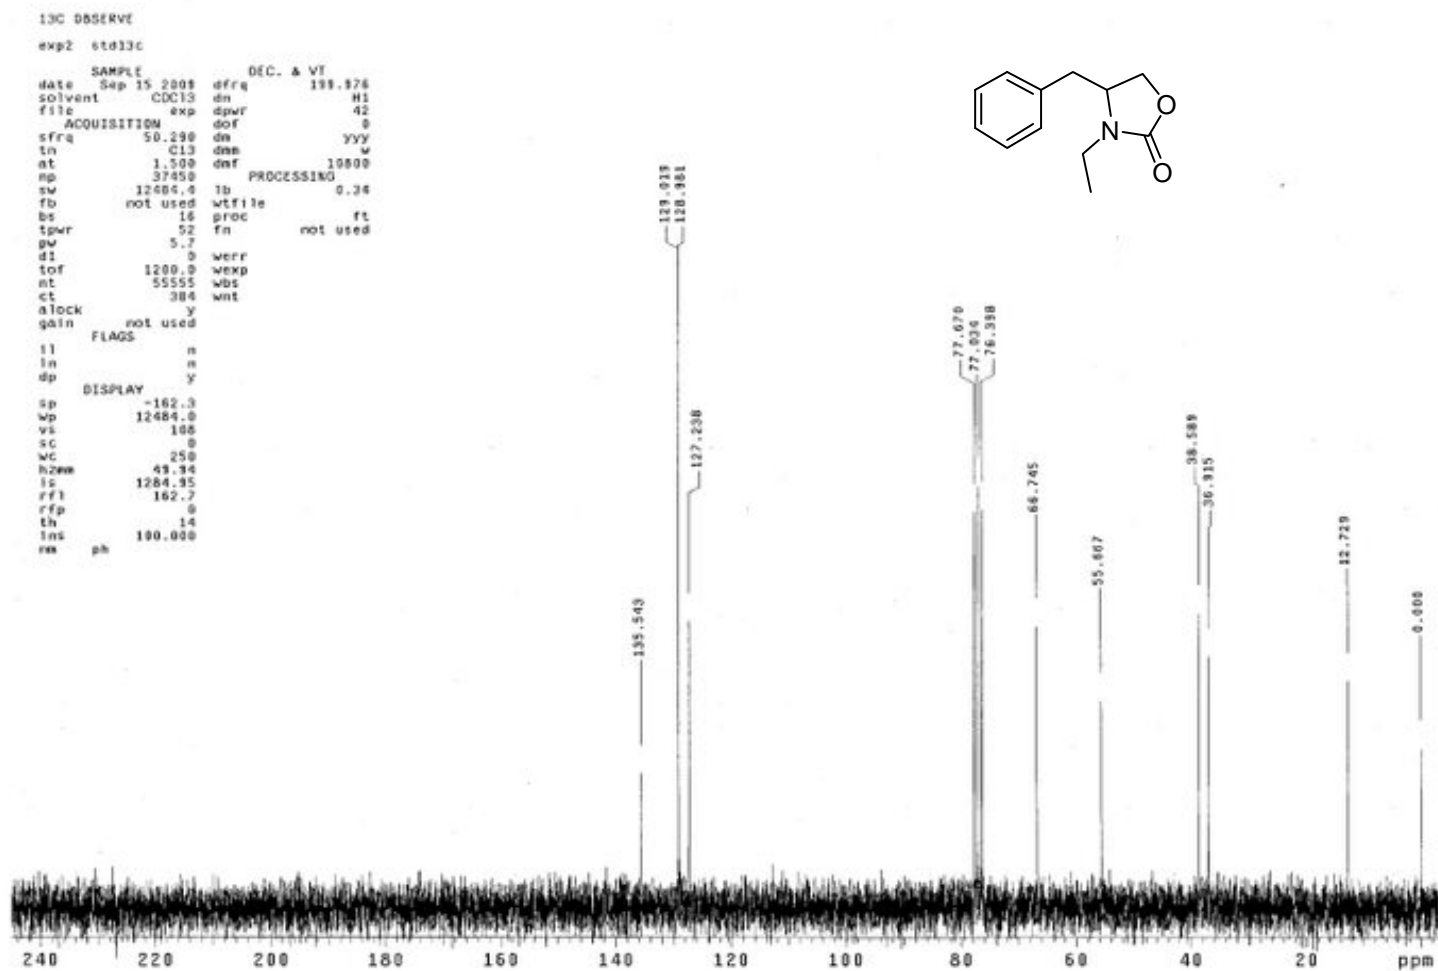

**Figure 16:**  $^{13}\text{C}$  NMR spectrum of 4-benzyl-3-ethyloxazolidin-2-one (**17**)

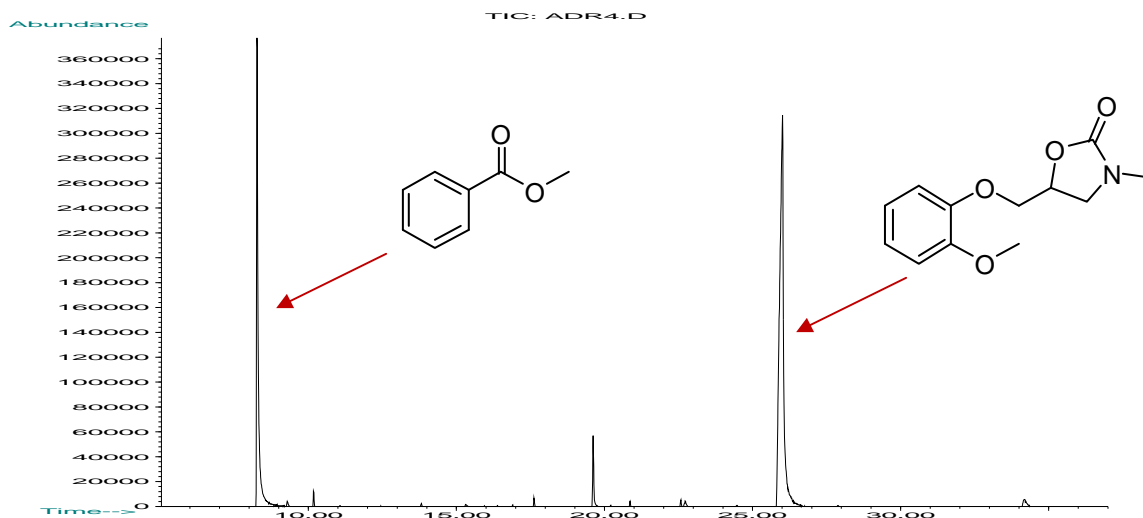

**Figure 17:** GC of reaction products 5-((2-methoxyphenoxy)-3-methyloxazolidin-2-one (16) and methyl benzoate.

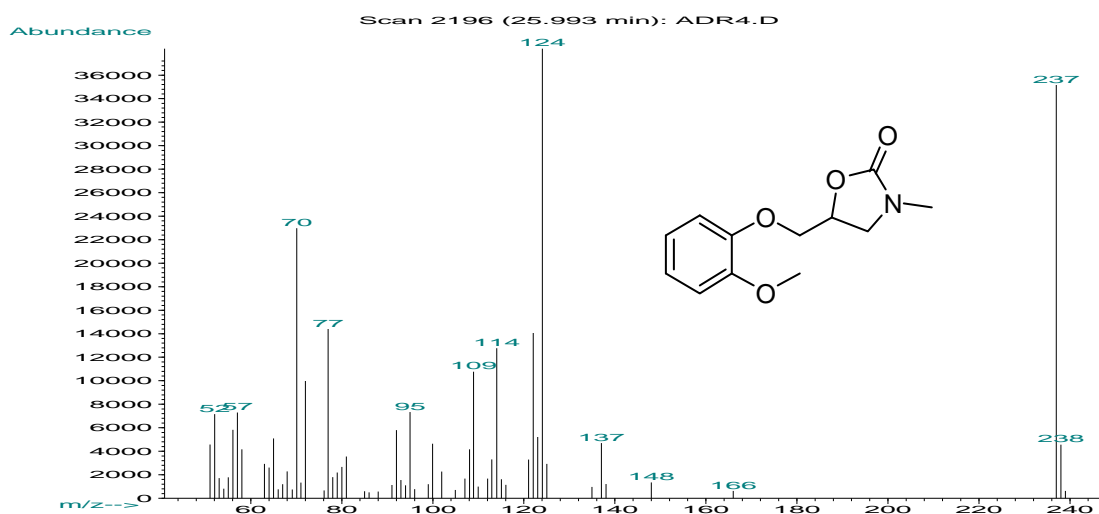

**Figure 18:** MS of 5-((2-methoxyphenoxy)-3-methyloxazolidin-2-one (16)

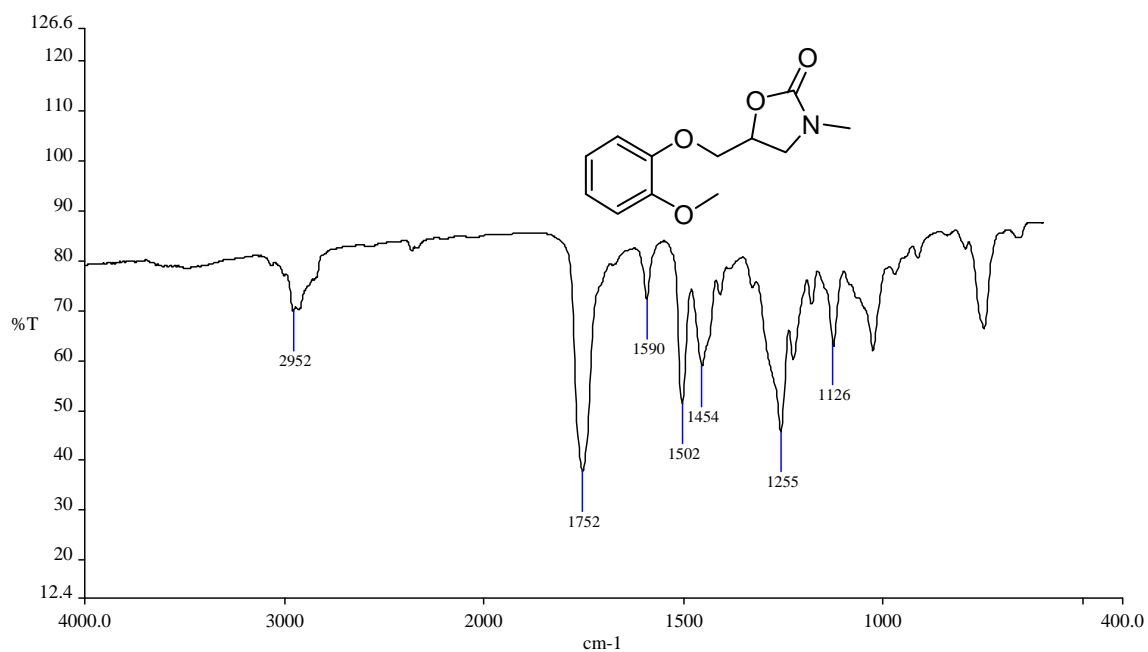

**Figure 19:** Infrared of 5-((2-methoxyphenoxy)-3-methyloxazolidin-2-one (**16**)
