# Supplementary material for: A Novel One-Pot and One-Step Microwave-Assisted Cyclization-Methylation Reaction of Amino Alcohols and Acetylated Derivatives with Dimethyl Carbonate and TBAC
Source: Hindawi journal article supplement (doi:10.1155/2014/634935), 2014-01-01
Supplement: f1 [file 634935.f1.zip]

## Supplementary information

### **A novel one-pot and one-step microwave-assisted cyclization-methylation reaction of amino alcohols and acetylated derivatives with dimethyl carbonate and TBAC**

Adrián Ochoa-Terán<sup>1</sup>, Leticia Guerrero R.\*<sup>2</sup> and Ignacio A. Rivero<sup>1</sup>

<sup>1</sup>*Centro de Graduados e Investigación en Química. Instituto Tecnológico de Tijuana.  
Bvd. Alberto Limón Padilla S/N. Tijuana, B.C. 22510. México*

<sup>2</sup>*Área de Ciencias Básicas e Ingenierías. Universidad Autónoma de Nayarit. Cd. de  
la Cultura Amado Nervo S/N. Tepic, Nay. 63190. México*

\* e-mail: [lguerrer@uan.edu.mx](mailto:lguerrer@uan.edu.mx) and [grolet\\_ros@yahoo.com.mx](mailto:grolet_ros@yahoo.com.mx)

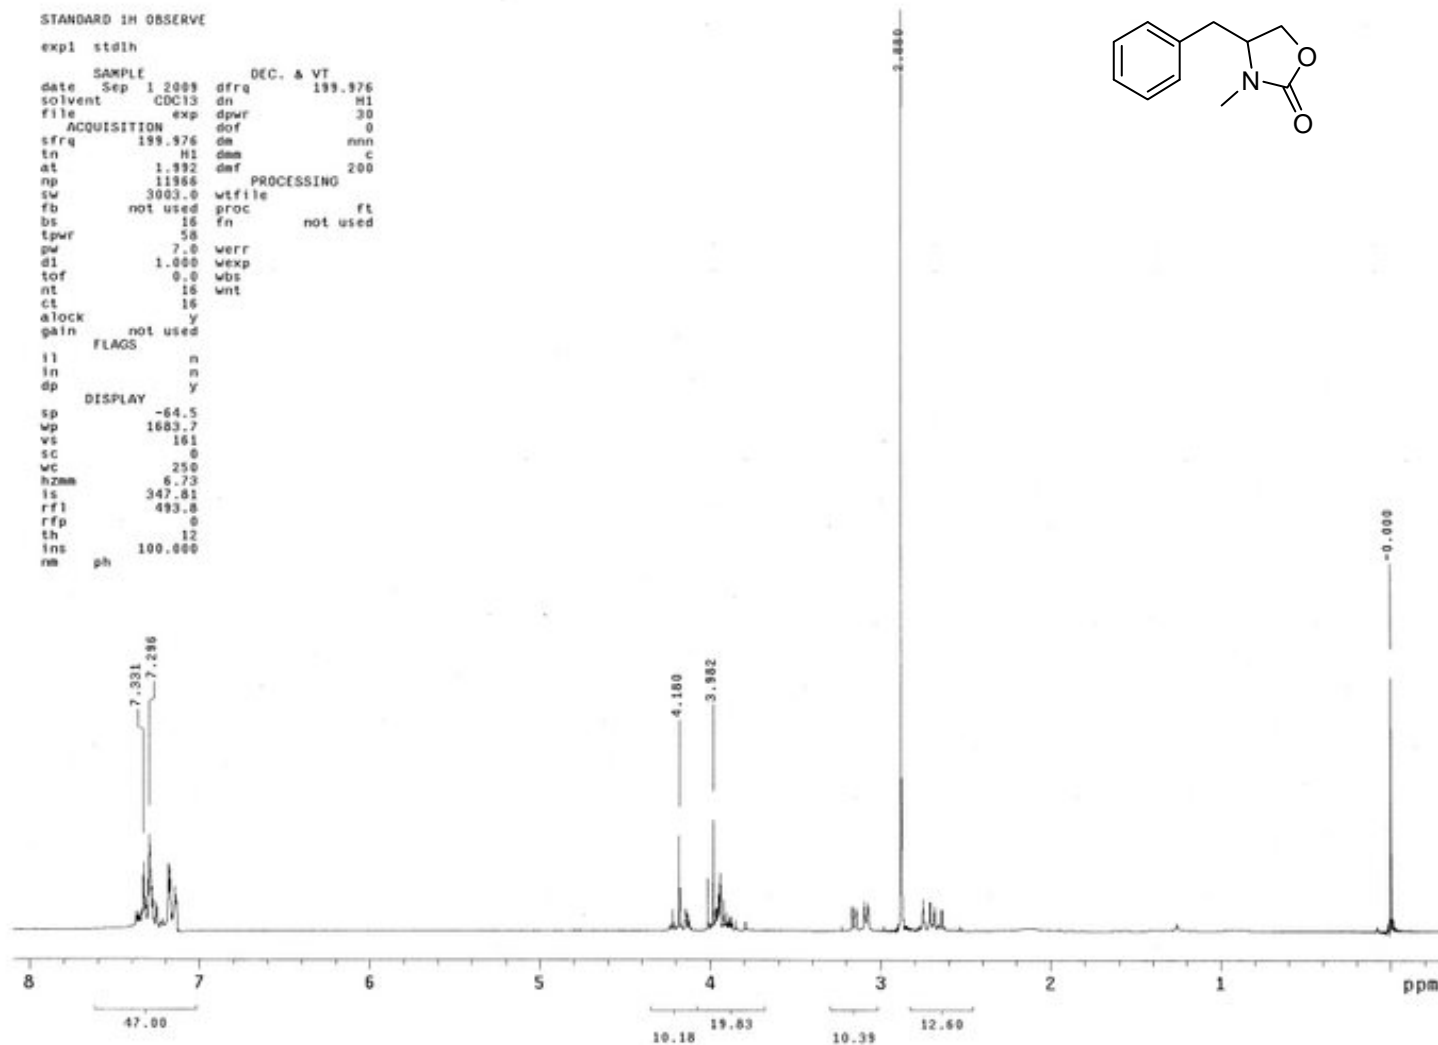

**Figure 1:**  $^1\text{H}$  NMR spectrum of 4-benzyl-3-methyloxazolidin-2-one (**5**)

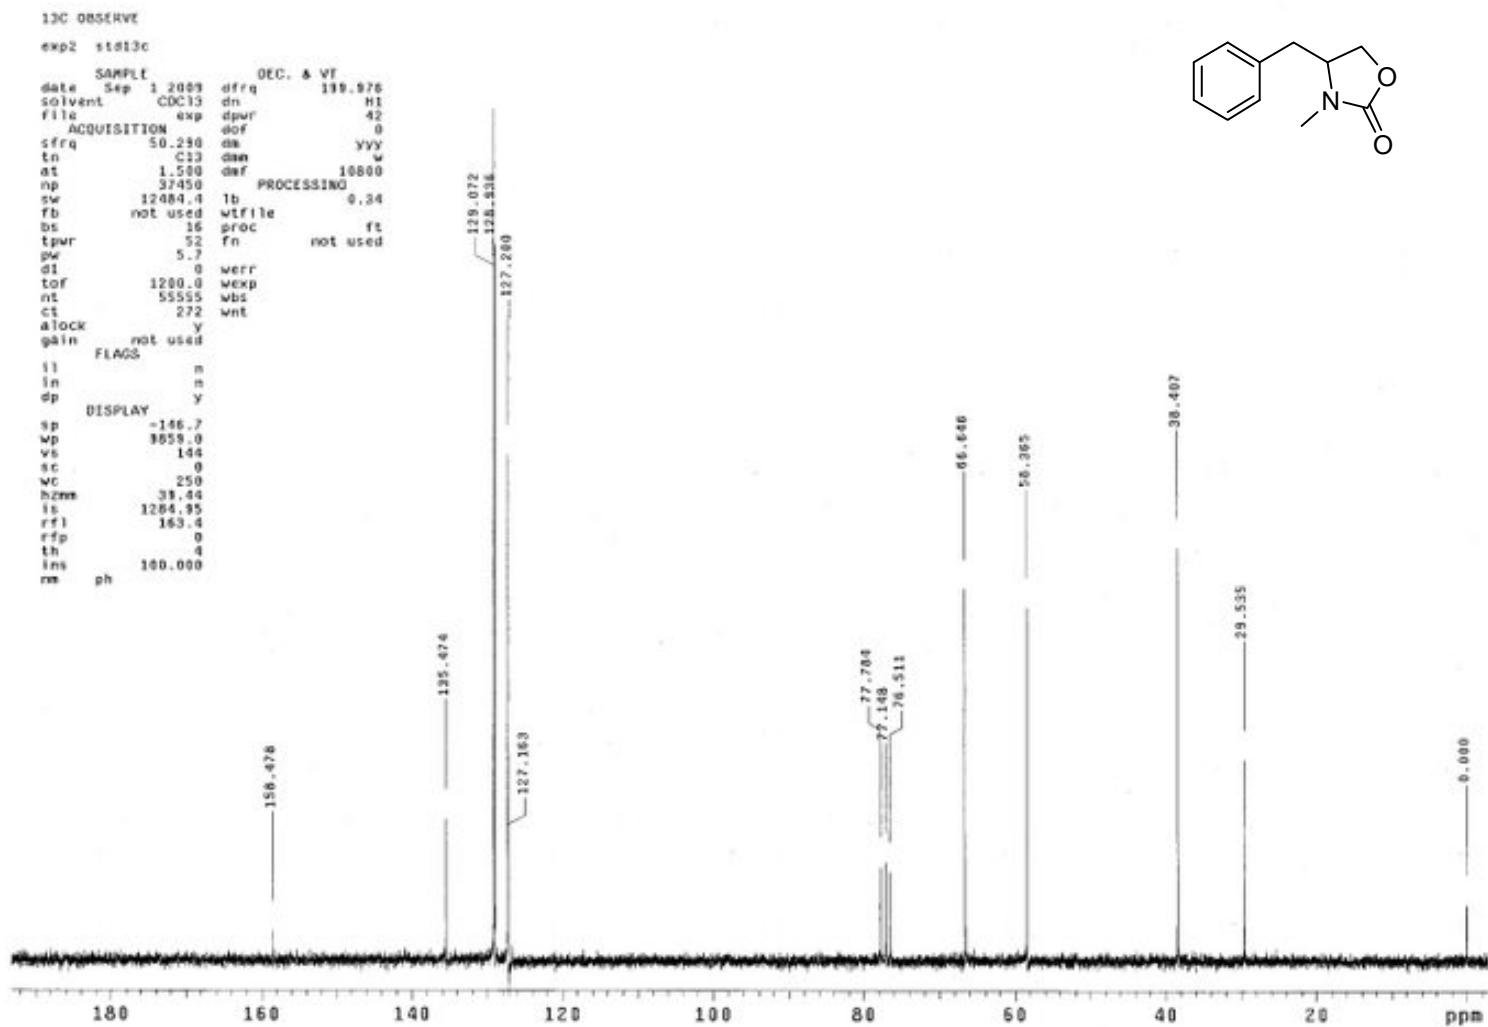

Figure 2:  $^{13}\text{C}$  NMR spectrum of 4-benzyl-3-methyloxazolidin-2-one (**5**)

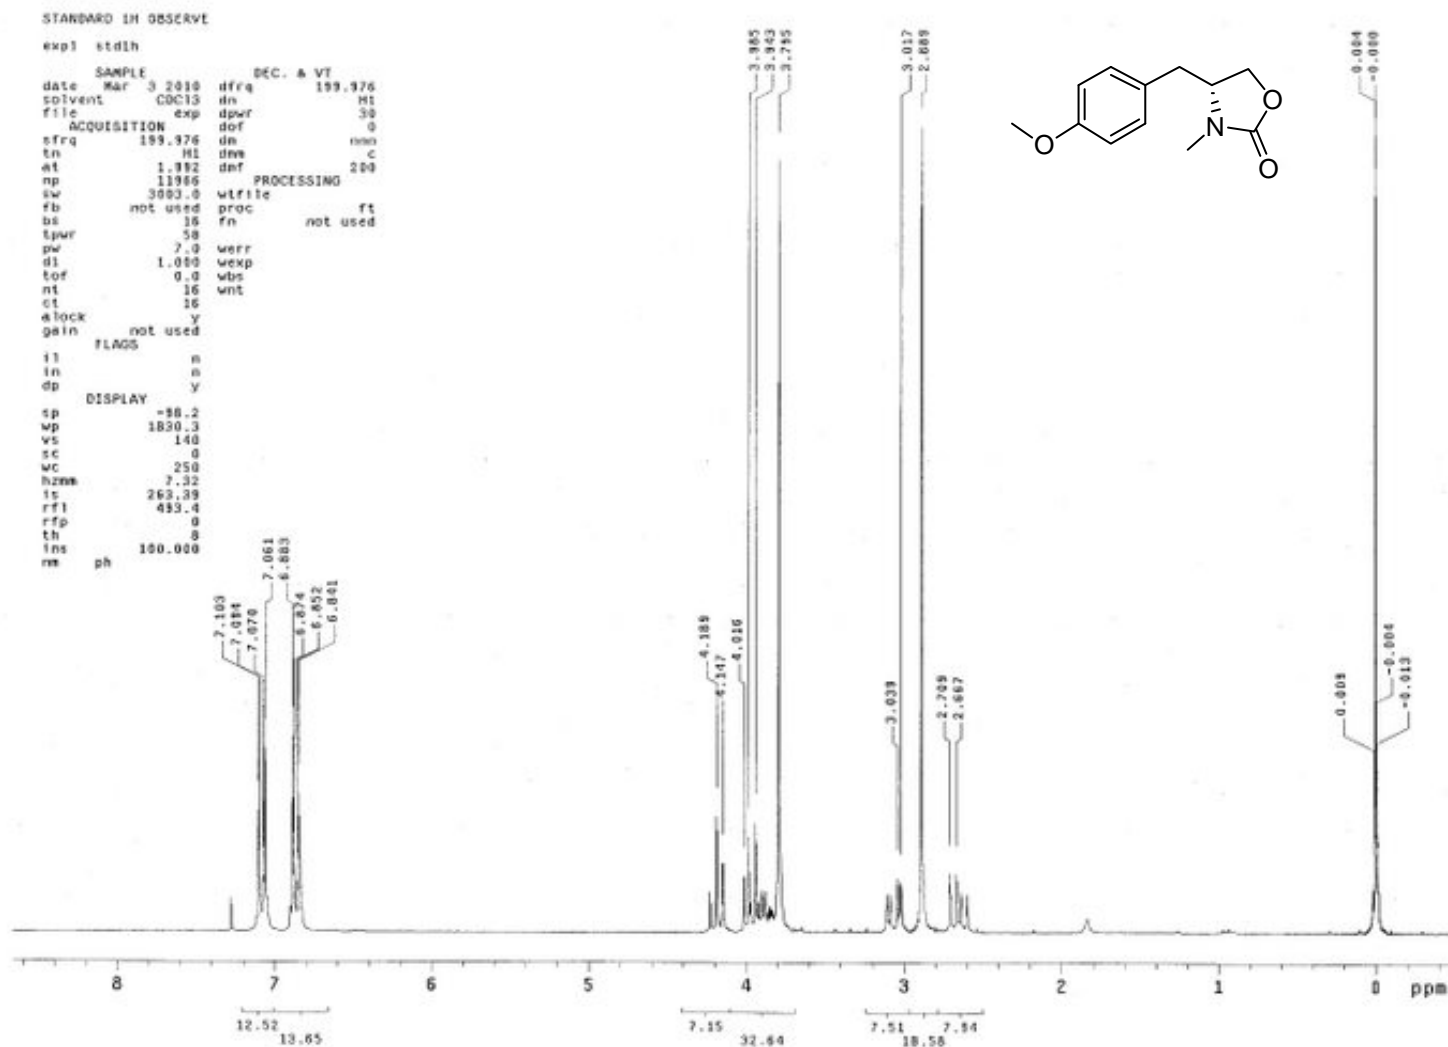

Figure 3:  $^1\text{H}$  NMR spectrum of (R)-4-(4-methoxybenzyl)-3-methyloxazolidin-2-one (**10**)

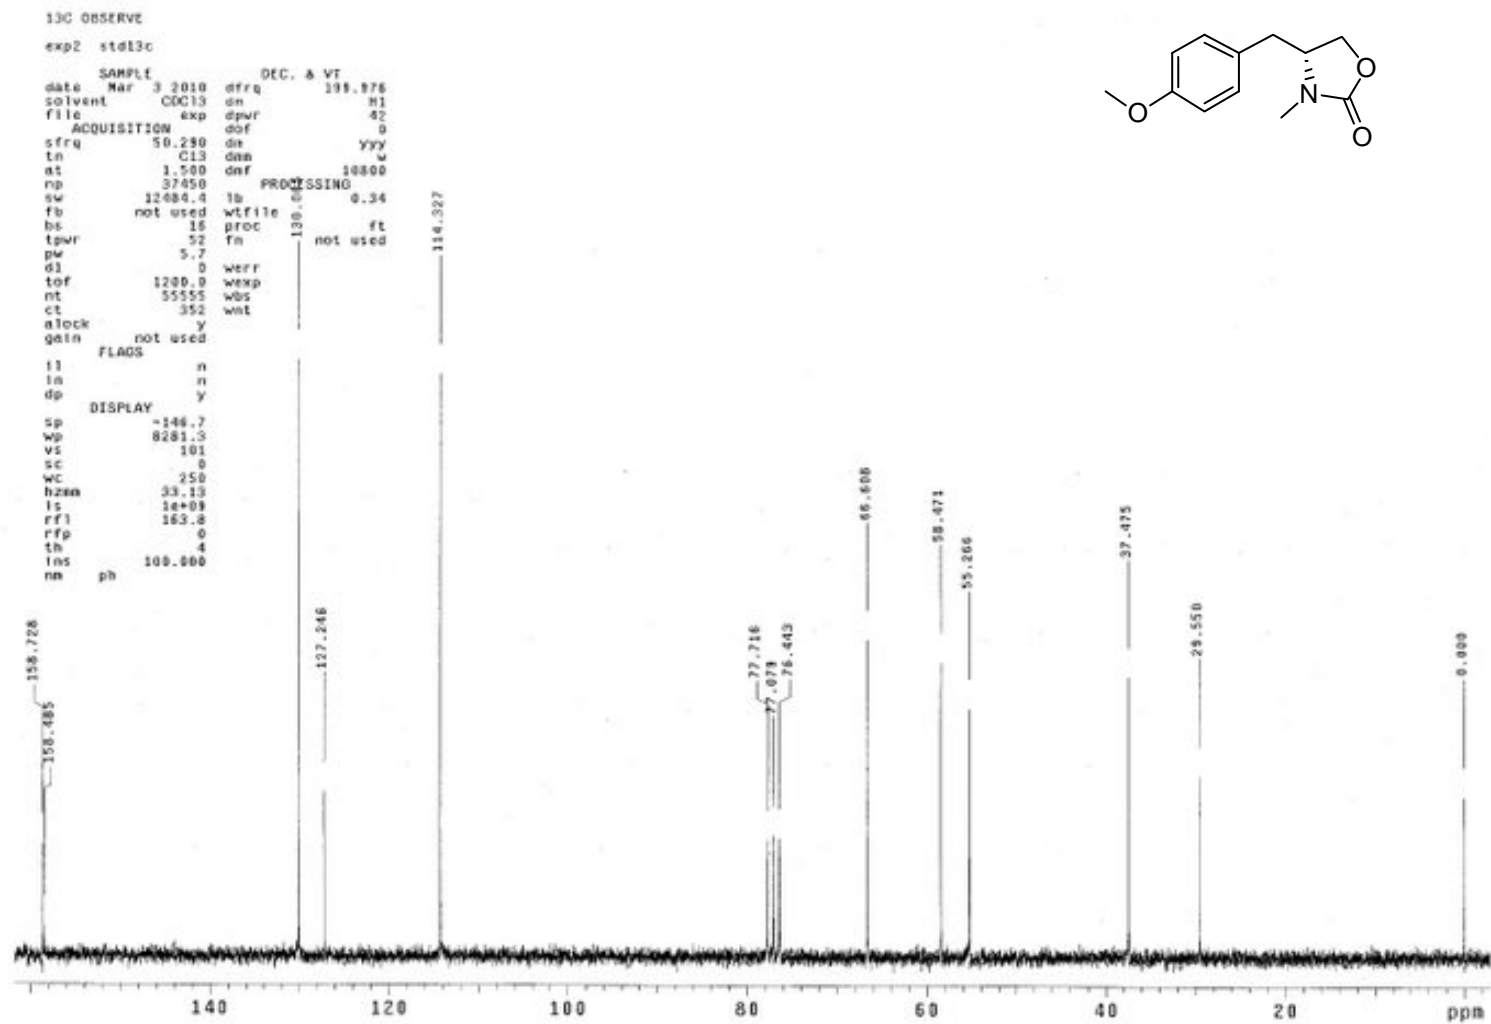

**Figure 4:**  $^{13}\text{C}$  NMR spectrum of (*R*)-4-(4-methoxybenzyl)-3-methyloxazolidin-2-one (**10**)

exp1 stdh

| SAMPLE      |             | DEC. & VT  |          |
|-------------|-------------|------------|----------|
| date        | Apr 27 2010 | dfrq       | 193.976  |
| solvent     | CDC13       | dn         | M1       |
| file        | exp         | dpr        | 30       |
| ACQUISITION |             | dof        | 193.2    |
| sfrq        | 193.976     | dm         | nnn      |
| in          | M1          | dnn        | C        |
| at          | 1.992       | daf        | 200      |
| sw          | 11966       | PROCESSING |          |
| fb          | 3063.0      | wtfile     |          |
| bs          | not used    | proc       | ft       |
| tp          | 16          | fn         | not used |
| pr          | 56          |            |          |
| d1          | 7.0         | verr       |          |
| tof         | 1.000       | wexp       |          |
| nt          | 0.0         | wbs        |          |
| ct          | 16          | wnt        |          |
| clock       | m           |            |          |
| gain        | not used    |            |          |
| FLAGS       |             |            |          |
| fl          | n           |            |          |
| in          | n           |            |          |
| dp          | y           |            |          |
| DISPLAY     |             |            |          |
| sp          | -114.0      |            |          |
| wp          | 1641.2      |            |          |
| ws          | 49          |            |          |
| sc          | 0           |            |          |
| wc          | 250         |            |          |
| hzmm        | 6.56        |            |          |
| ls          | 239.26      |            |          |
| rff         | 489.0       |            |          |
| rffp        | 0           |            |          |
| th          | 0           |            |          |
| lms         | 100.000     |            |          |
| al          | ph          |            |          |

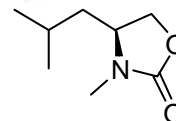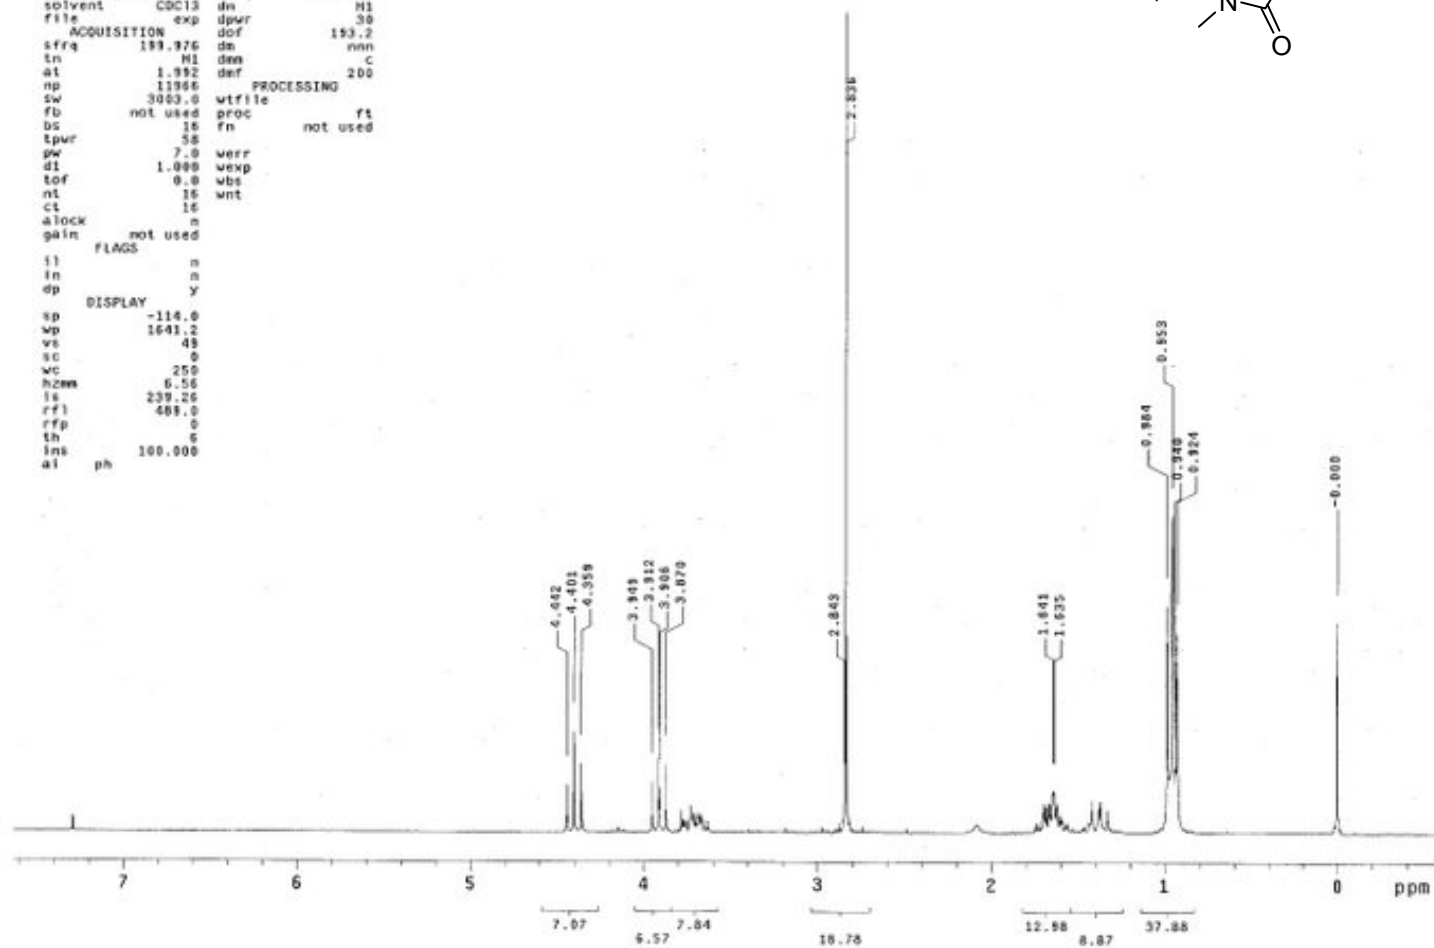

**Figure 5:**  $^1\text{H}$  NMR spectrum of (*S*)-4-isobutyl-3-methyloxazolidin-2-one (**11**)

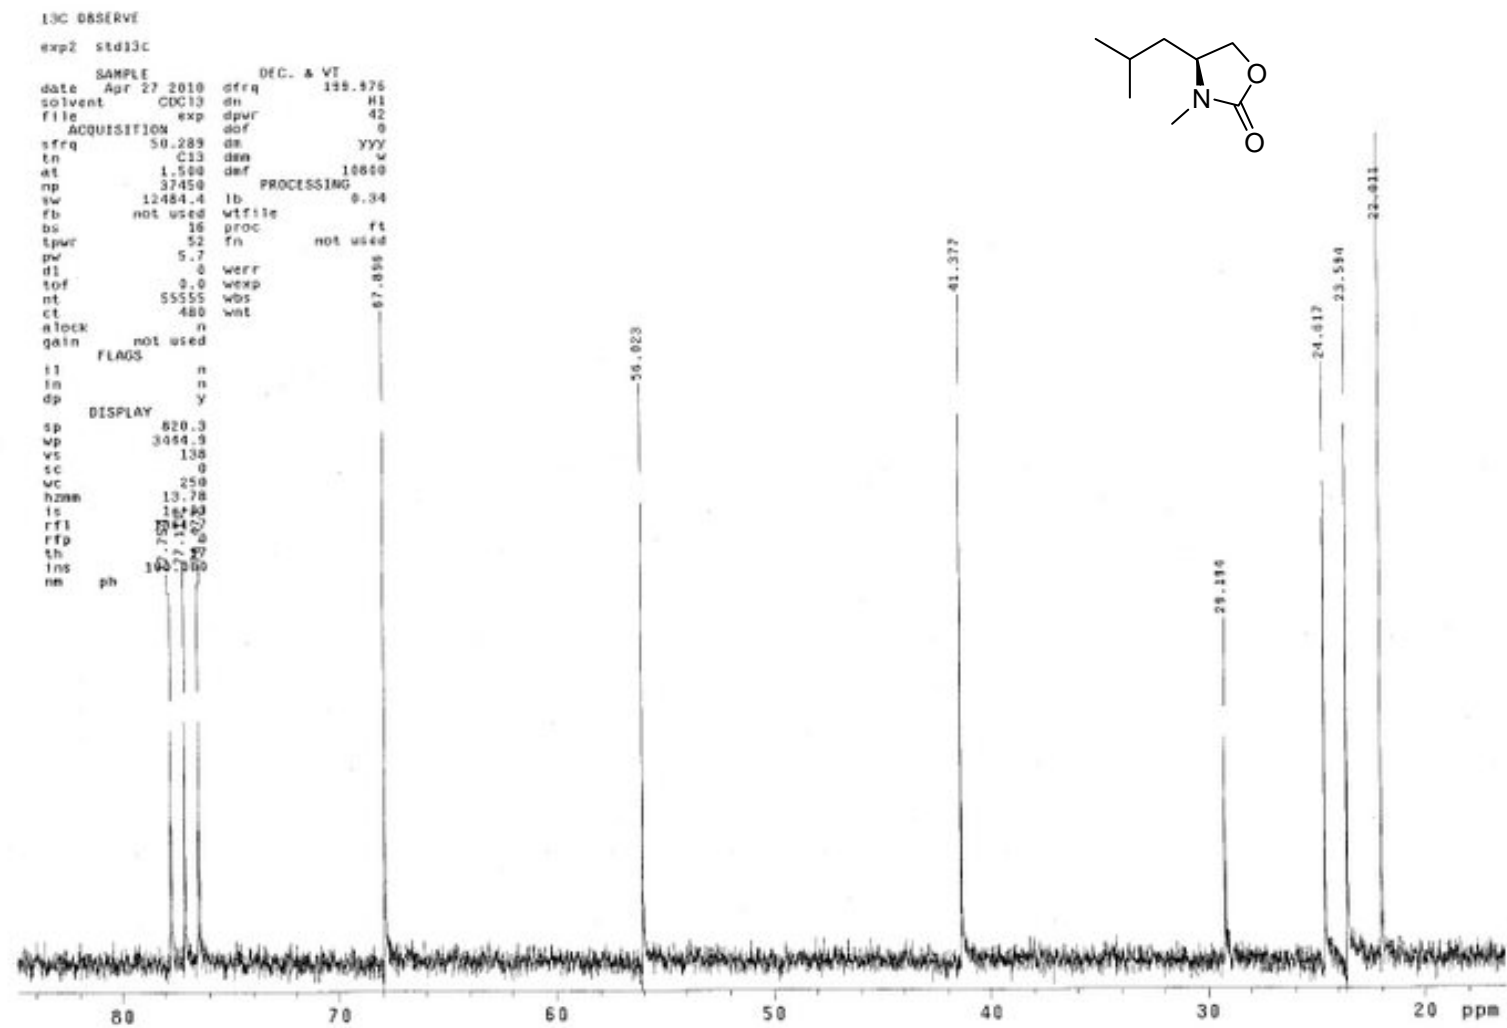

**Figure 6:**  $^{13}\text{C}$  NMR spectrum of (S)-4-isobutyl-3-methyloxazolidin-2-one (**11**)

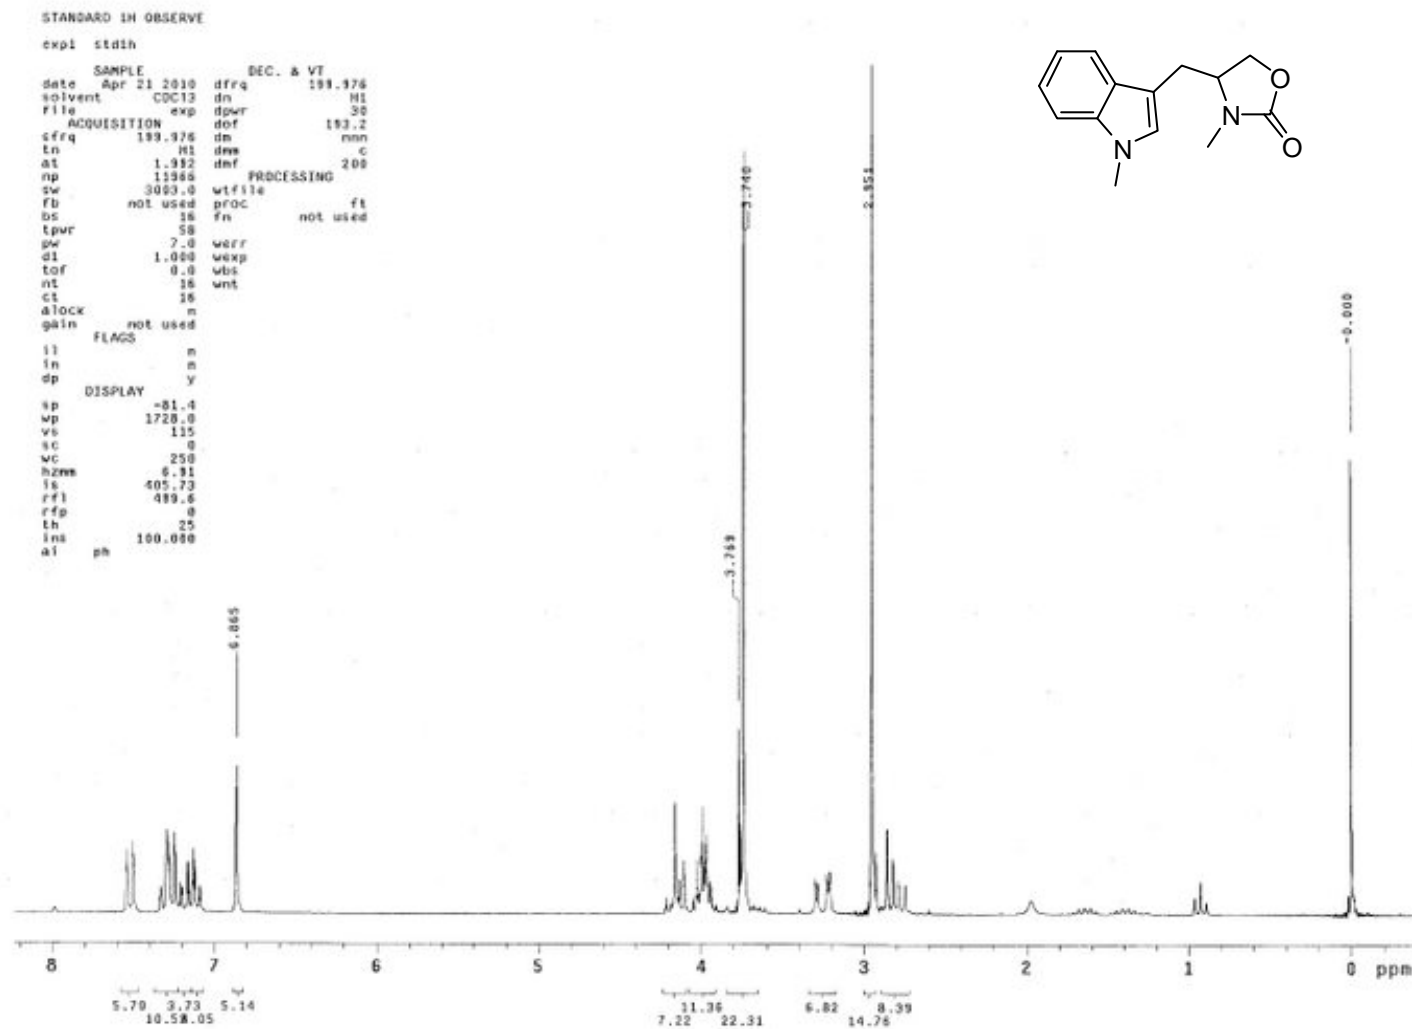

**Figure 7:**  $^1\text{H}$  NMR spectrum of 3-methyl-4-((1-methyl-1*H*-indol-3-yl)methyl)oxazolidin-2-one (**12**)



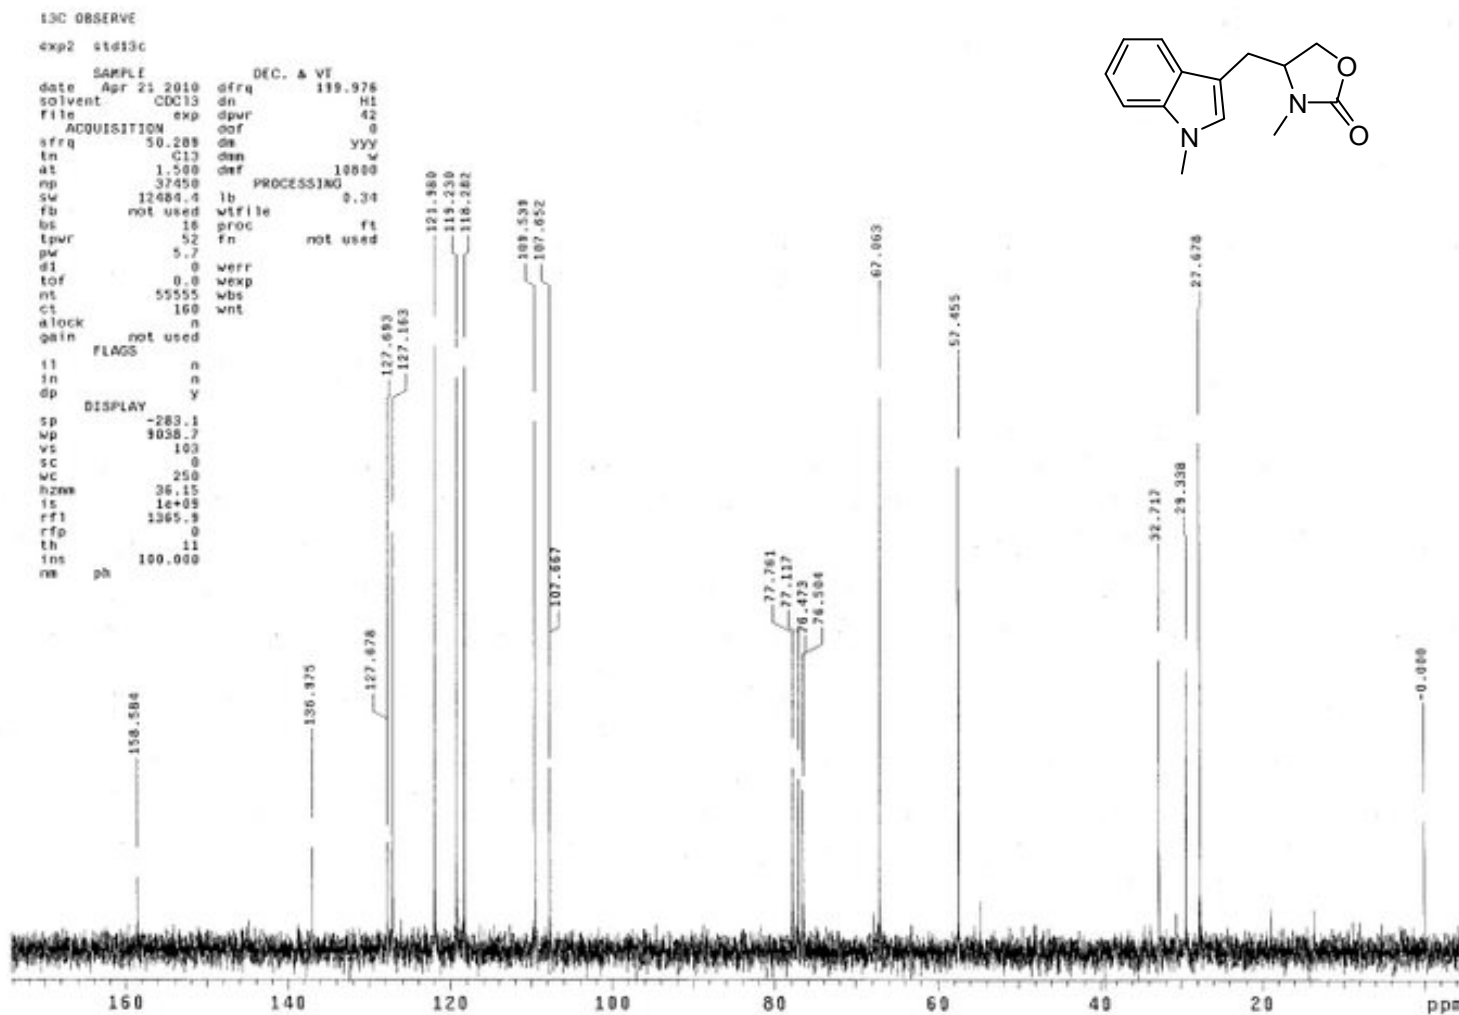

**Figure 8:**  $^{13}\text{C}$  NMR spectrum of 3-methyl-4-((1-methyl-1*H*-indol-3-yl)methyl)oxazolidin-2-one (**12**)

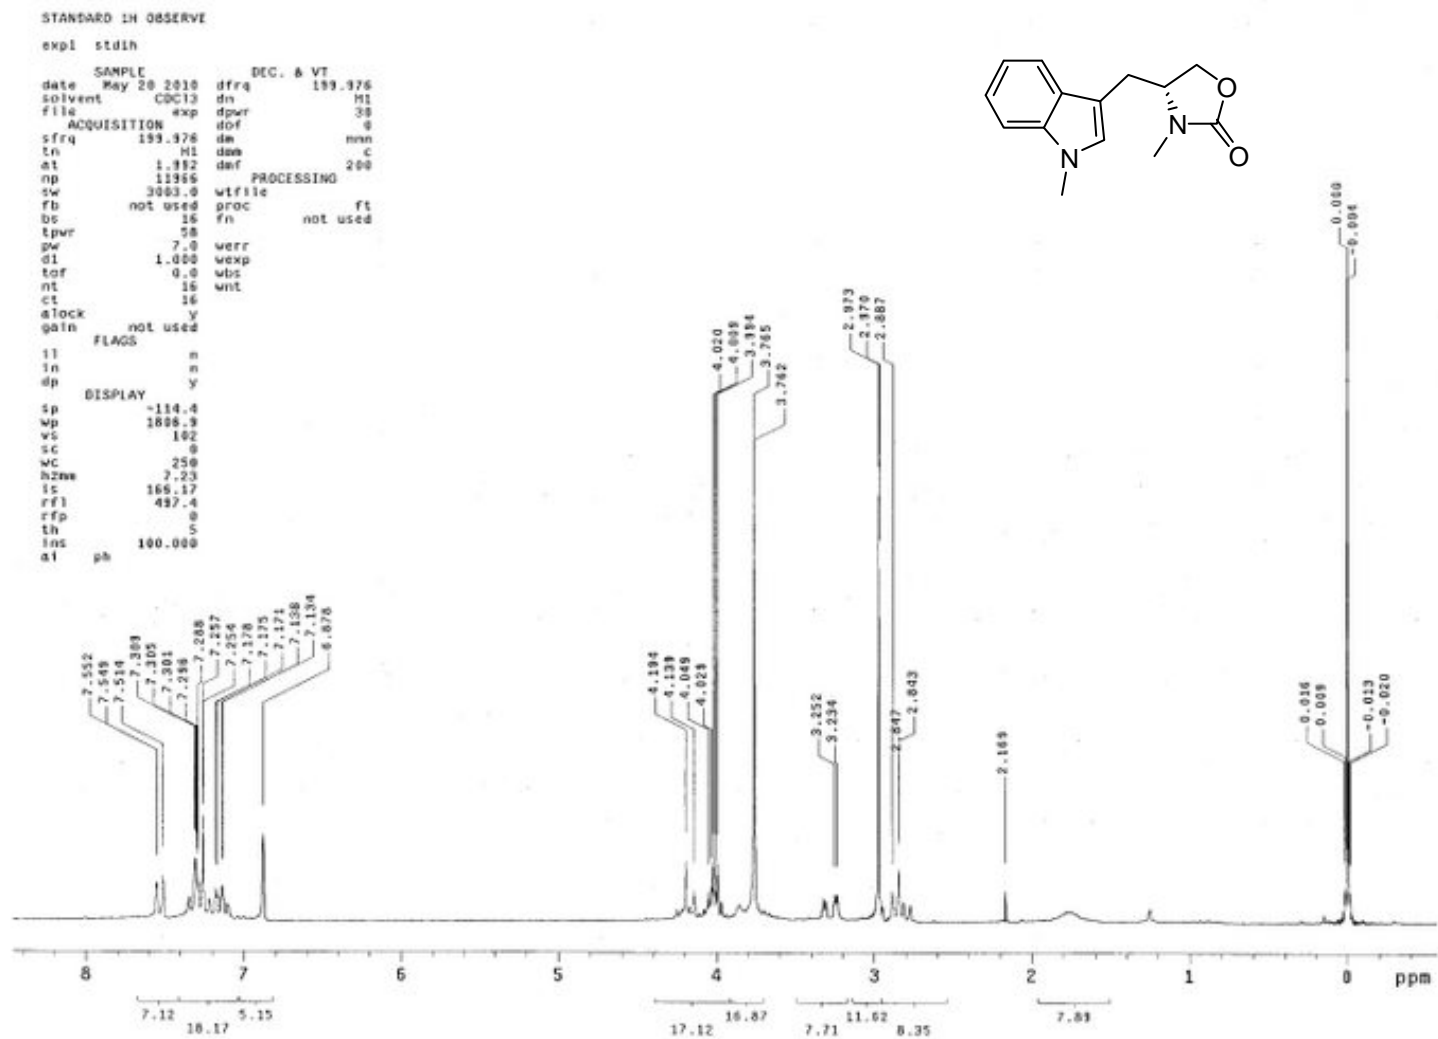

**Figure 9:**  $^1\text{H}$  NMR spectrum of (*R*)-3-methyl-4-((1-methyl-1*H*-indol-3-yl)methyl)oxazolidin-2-one (**13**)

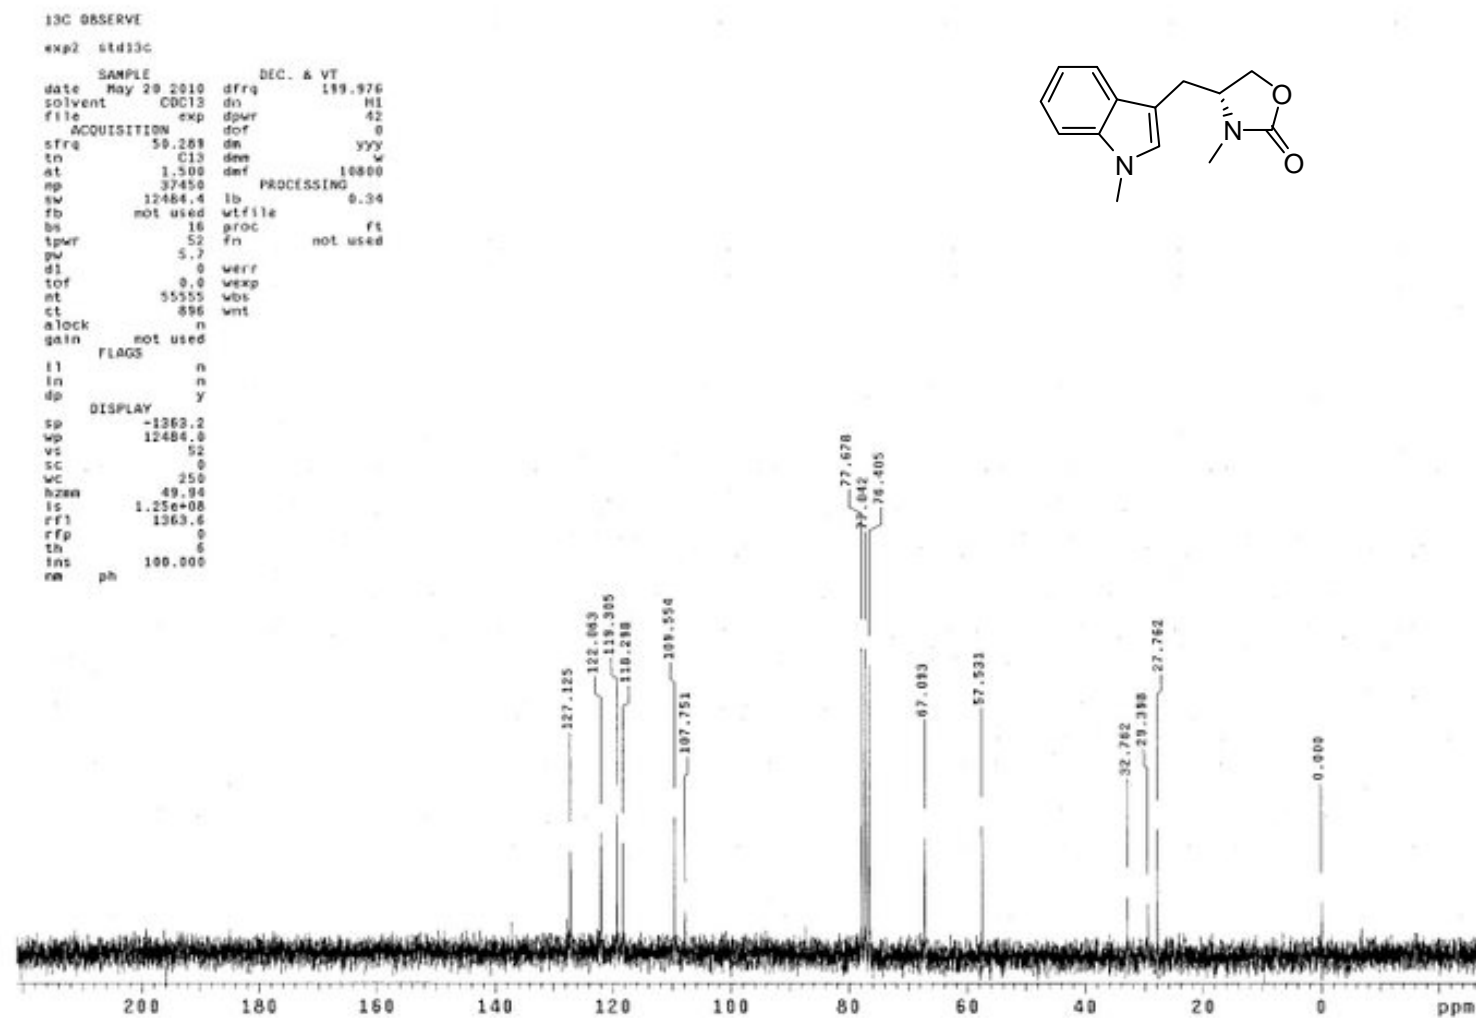

**Figure 10:**  $^{13}\text{C}$  NMR spectrum of (R)-3-methyl-4-((1-methyl-1H-indol-3-yl)methyl)oxazolidin-2-one (**13**)

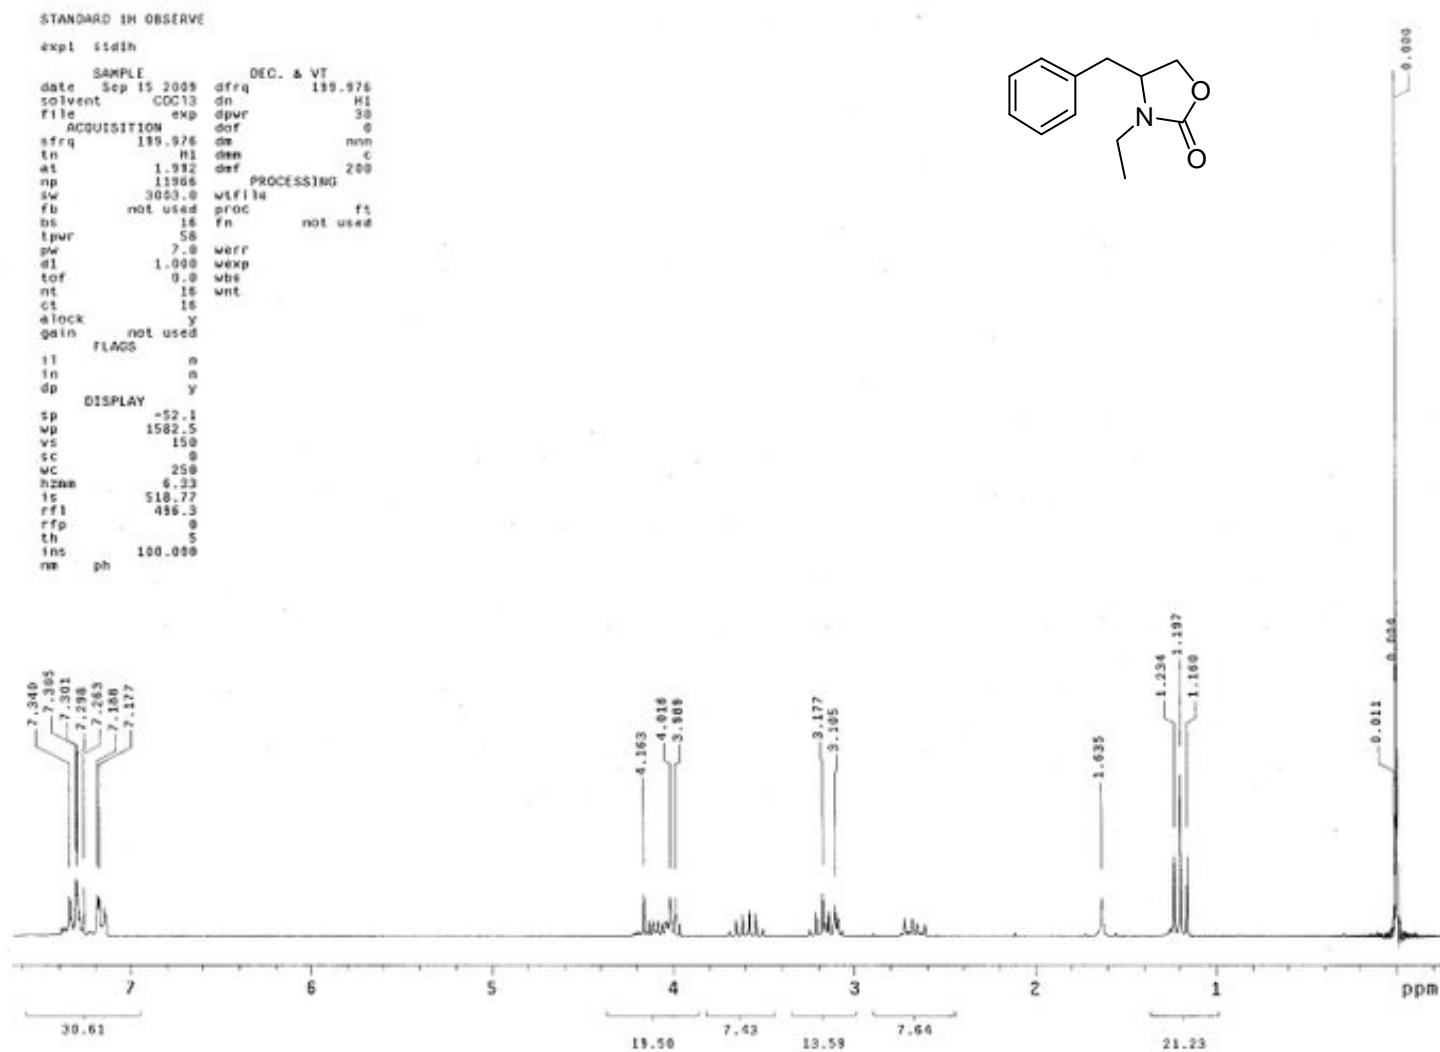

**Figure 11:**  $^1\text{H}$  NMR spectrum of 4-benzyl-3-ethyloxazolidin-2-one (**17**)

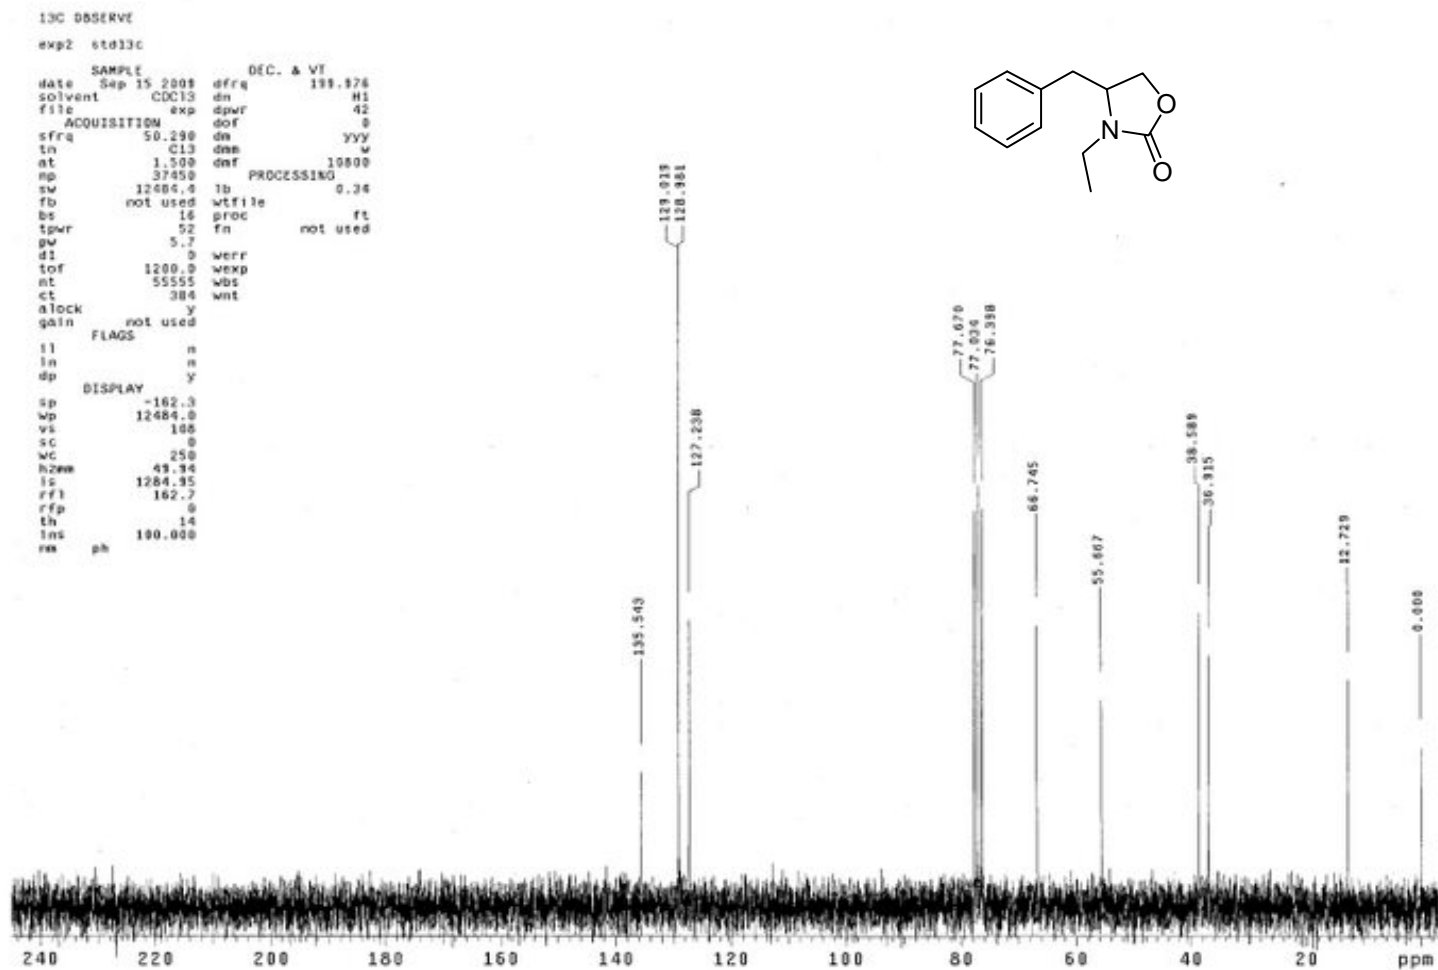

Figure 12:  $^{13}\text{C}$  NMR spectrum of 4-benzyl-3-ethyloxazolidin-2-one (17)

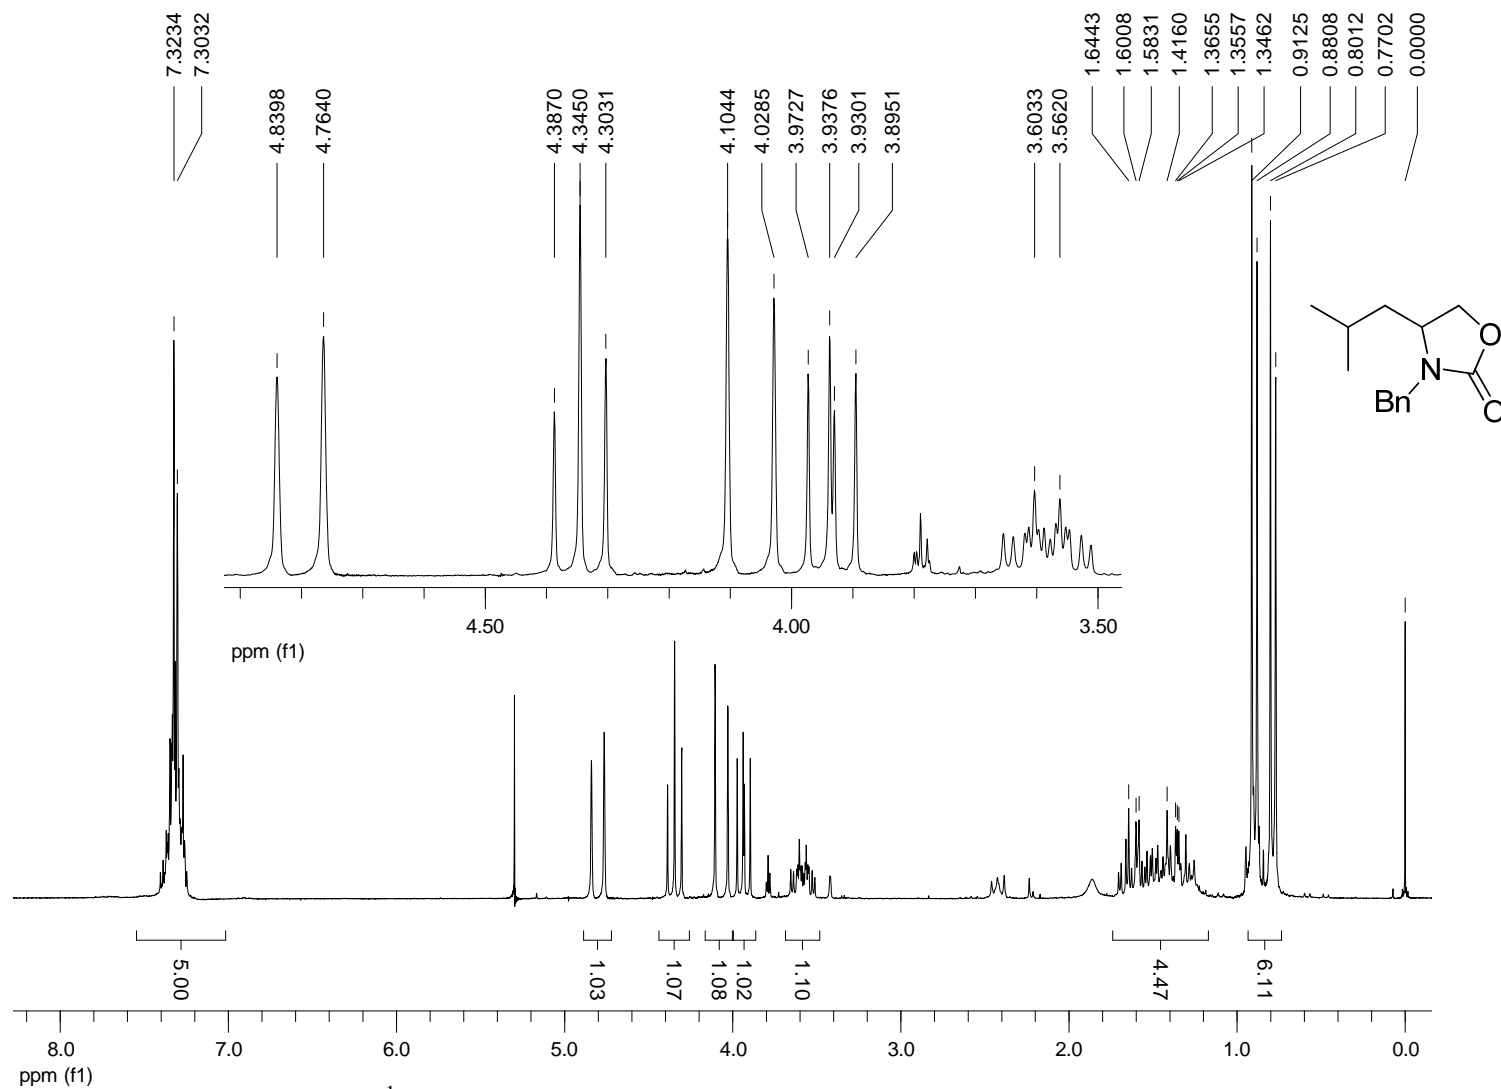

**Figure 13:** <sup>1</sup>H NMR spectrum of 3-benzyl-4-isobutyloxazolidin-2-one (**19**)

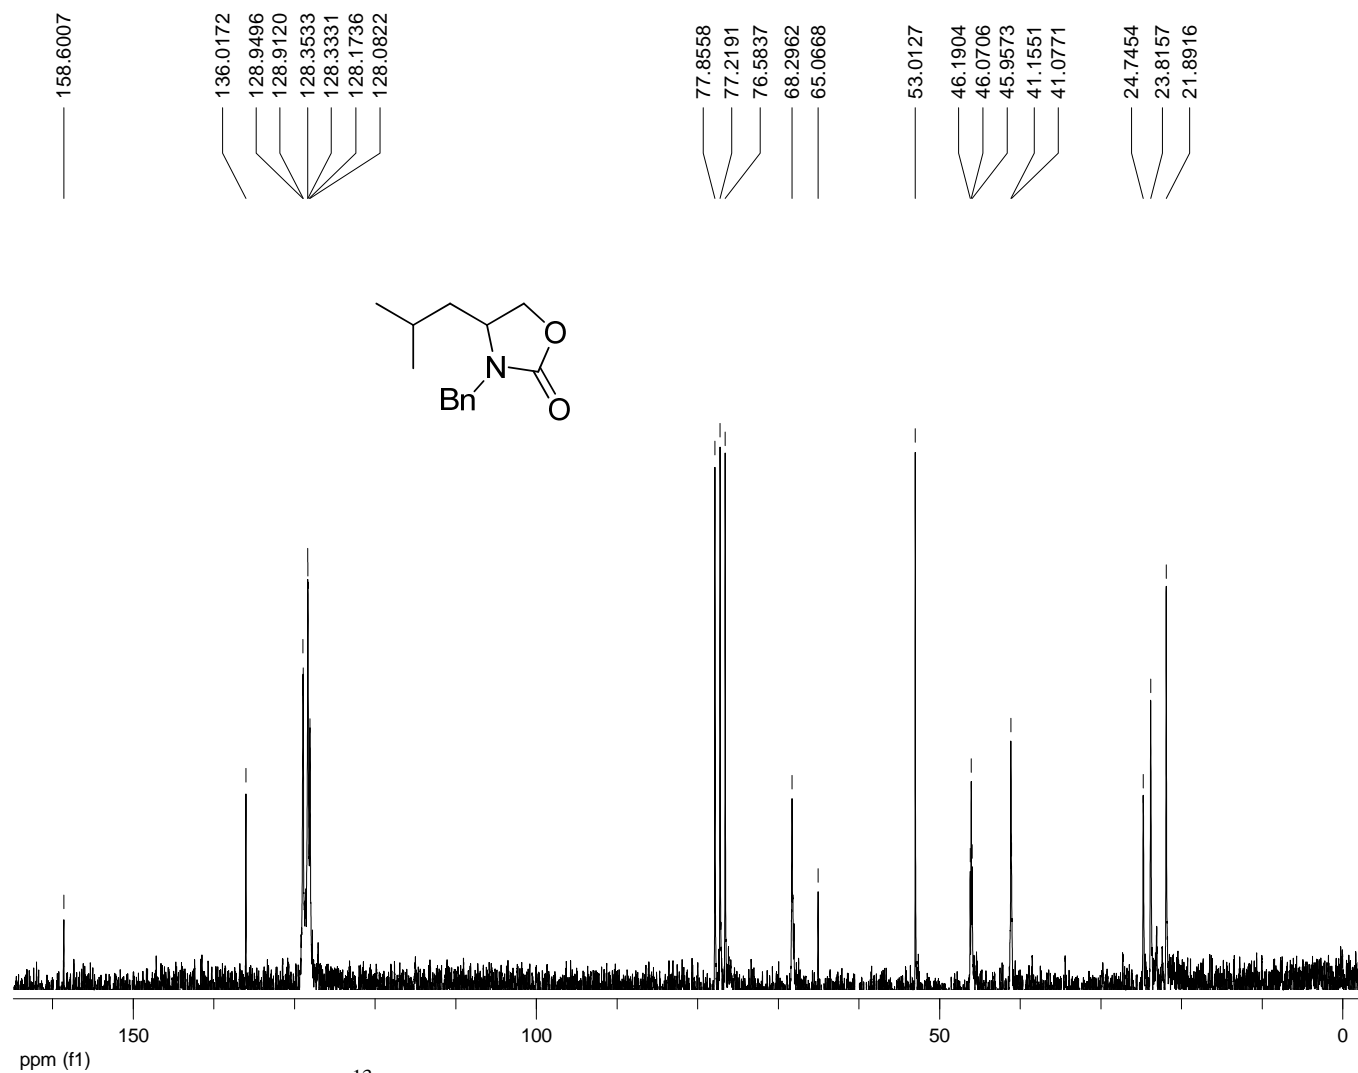

**Figure 14:** <sup>13</sup>C NMR spectrum of 3-benzyl-4-isobutyloxazolidin-2-one (**19**)

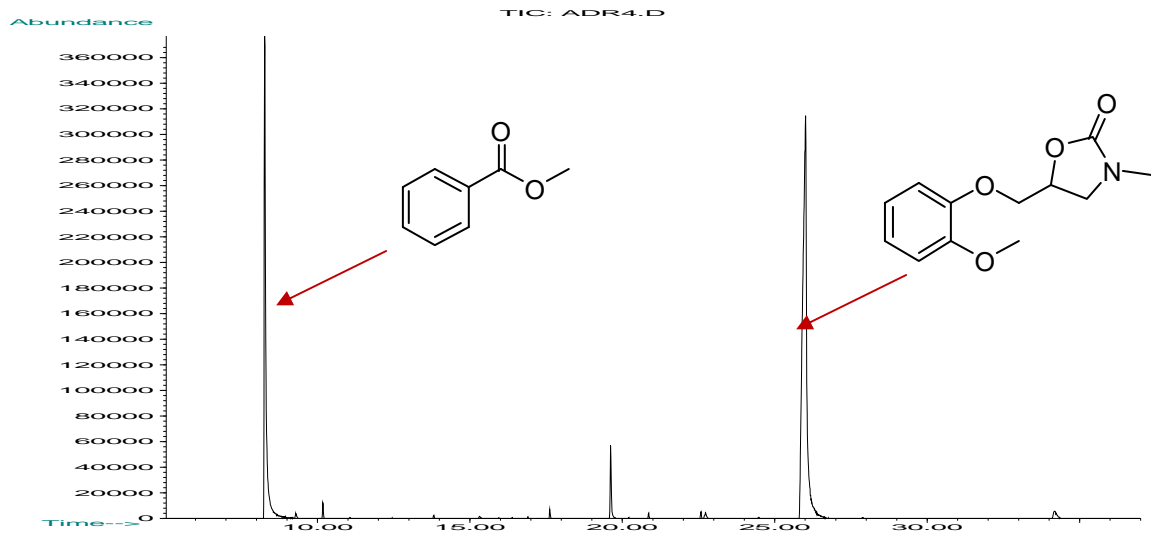

**Figure 15:** GC of reaction products 5-((2-methoxyphenoxy)-3-methyloxazolidin-2-one (**16**) and methyl benzoate.

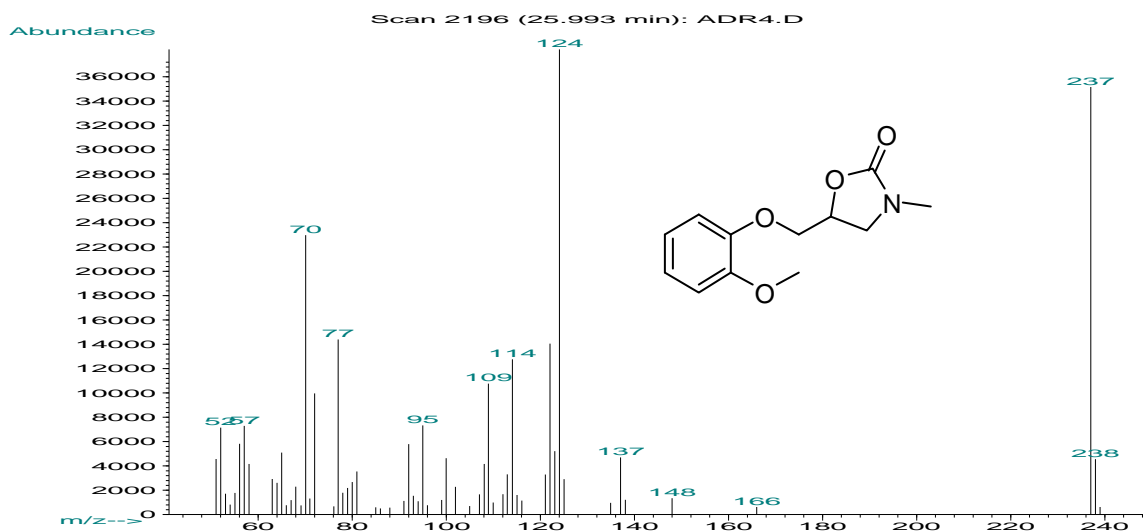

**Figure 16:** MS of 5-((2-methoxyphenoxy)-3-methyloxazolidin-2-one (**16**)



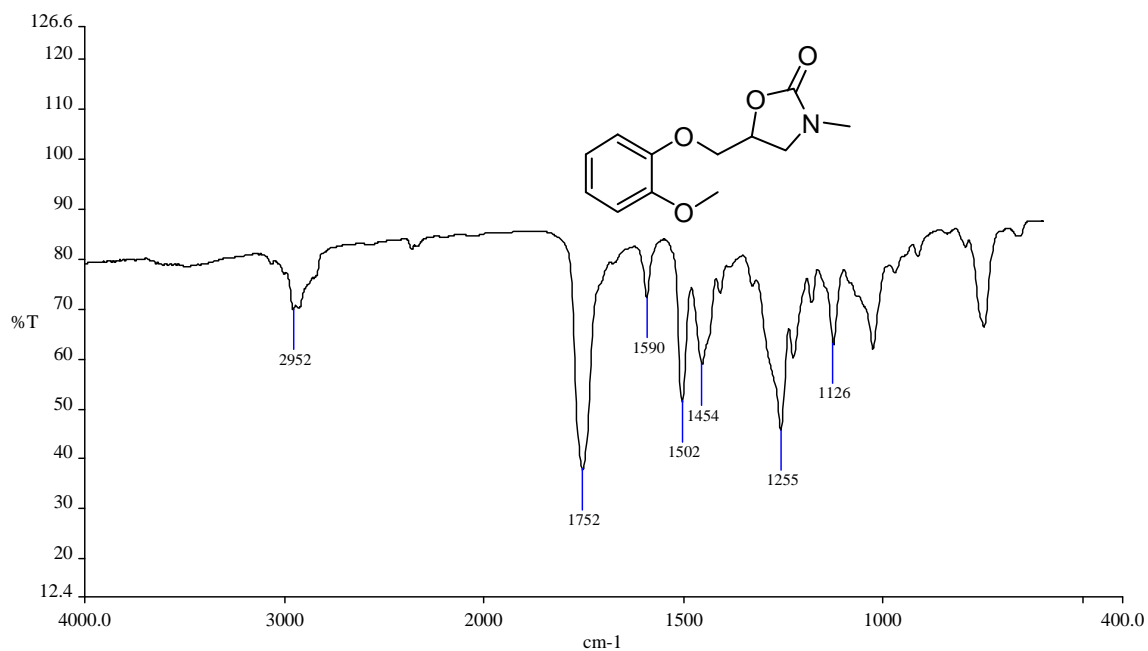

**Figure 17:** IR spectrum of 5-((2-methoxyphenoxy)-3-methyloxazolidin-2-one (**16**)

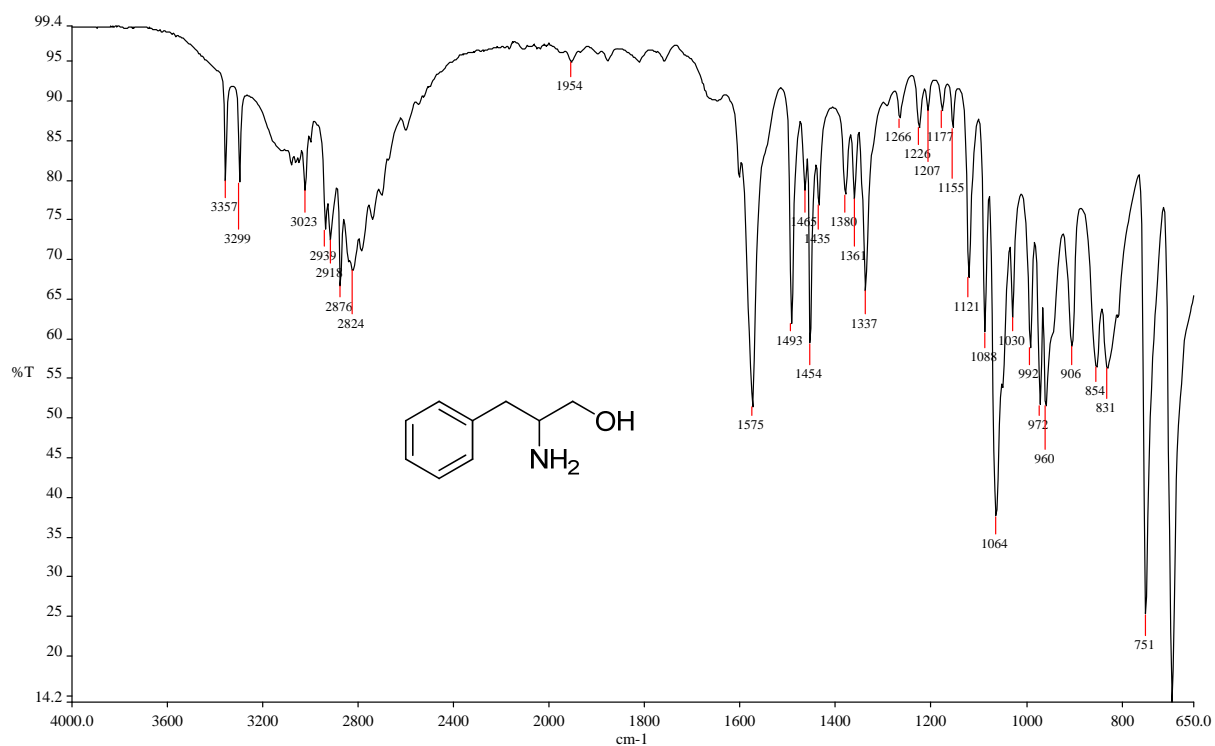

**Figure 18:** IR spectrum of 2-amino-3-phenylpropan-1-ol (**1**)

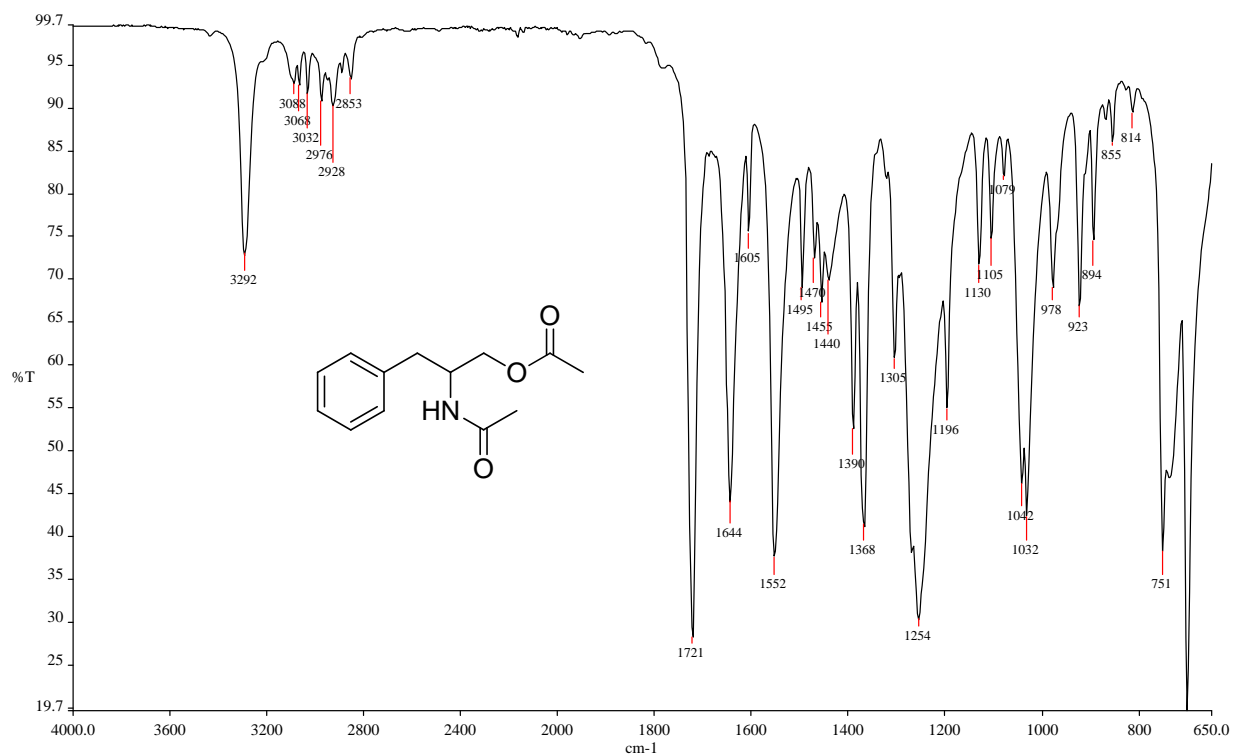

**Figure 19:** IR spectrum of 2-acetamido-3-phenylpropyl acetate (3)

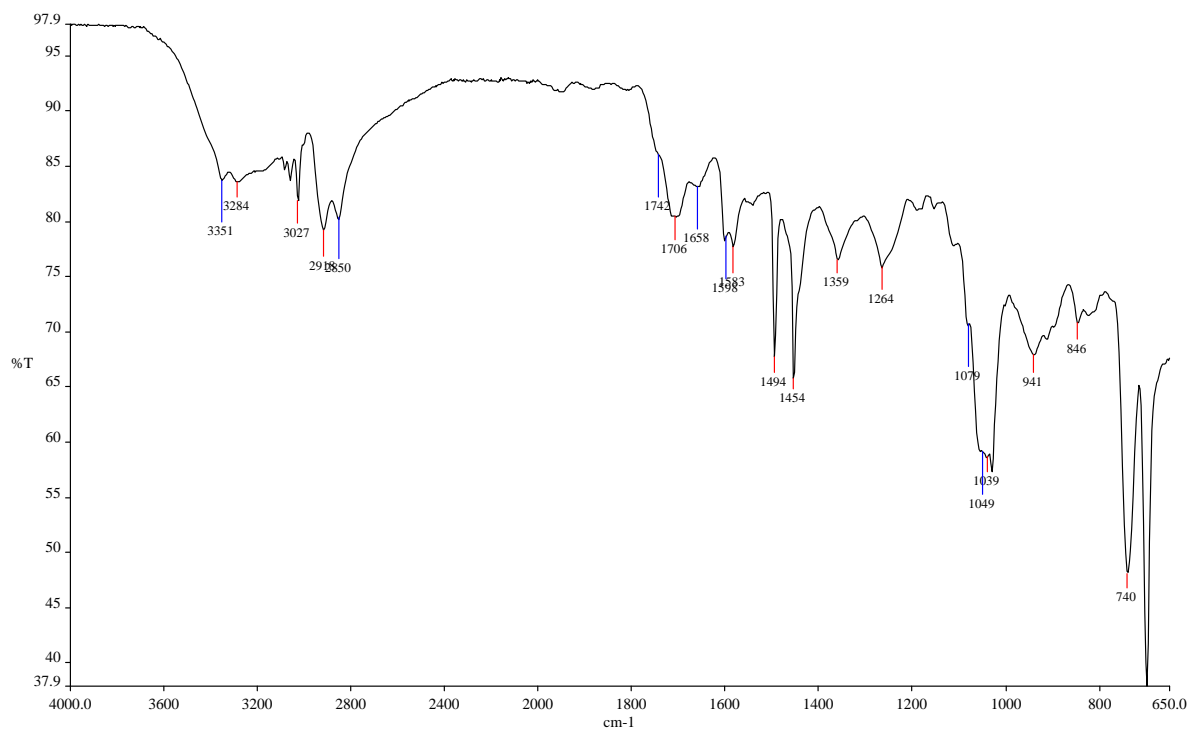

**Figure 20:** IR spectrum of crude obtained in conditions described in Table 2, entry 1

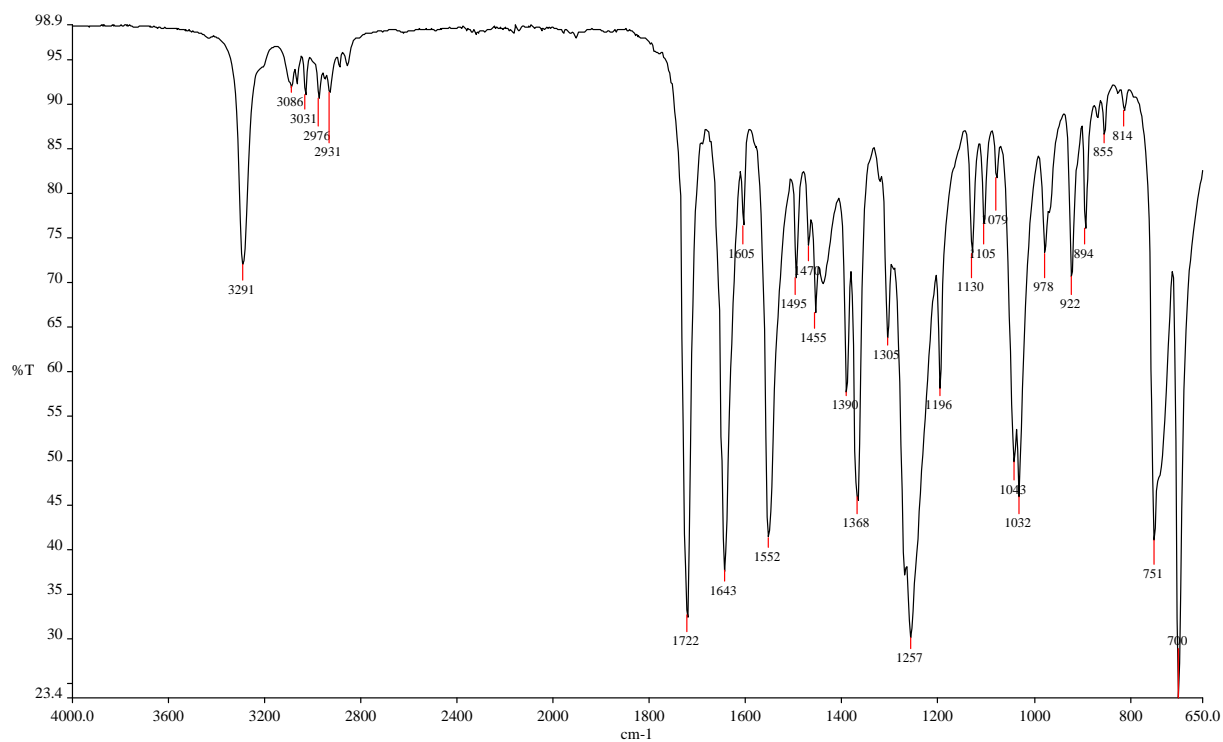

**Figure 21:** IR spectrum of crude product described in Table 2, entry 2.

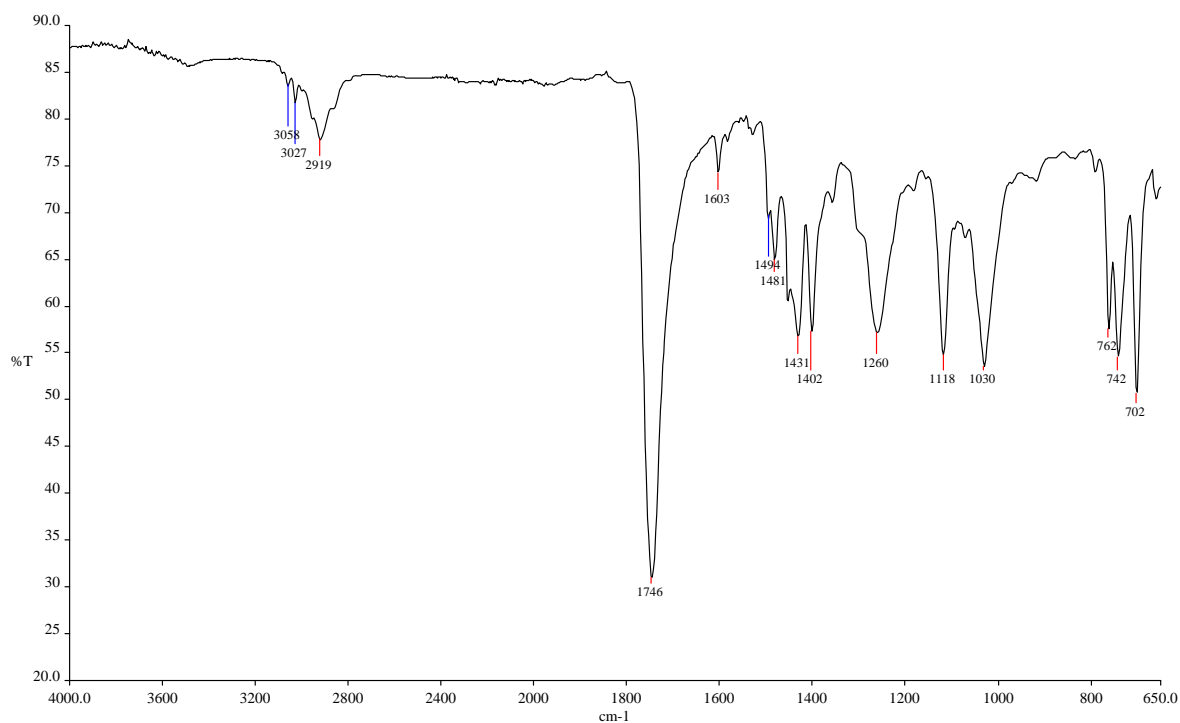

**Figure 22:** IR spectrum of crude obtained in conditions described in Table 2, entry 3

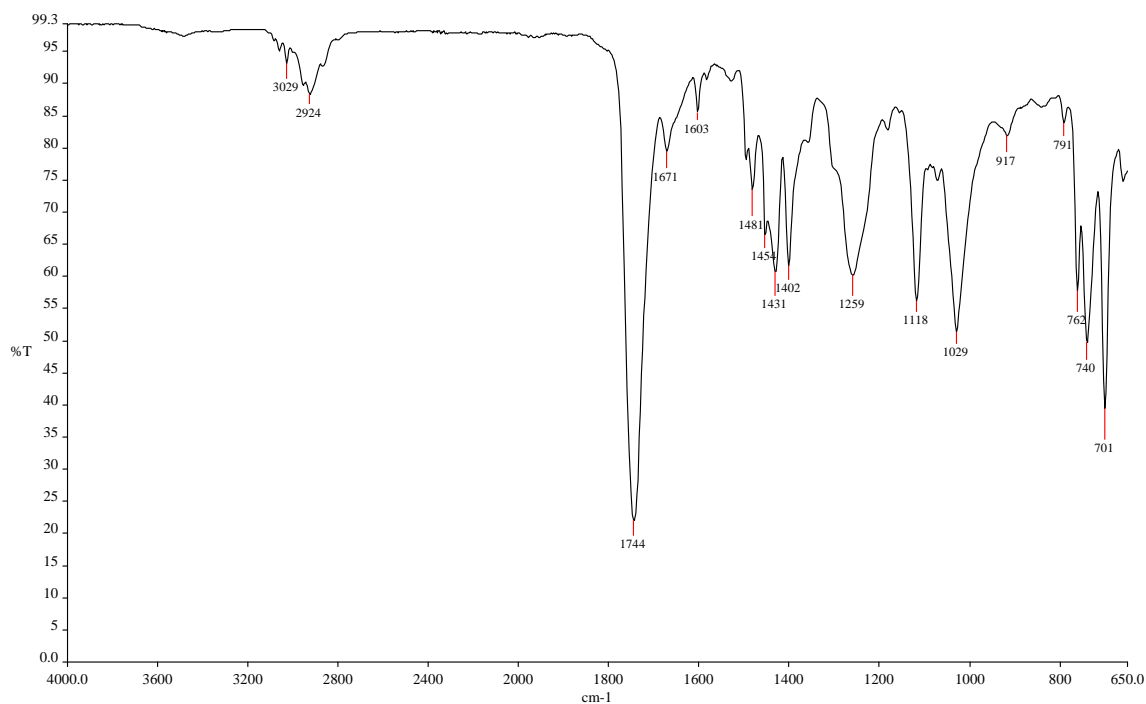

**Figure 23:** IR spectrum of crude obtained in conditions described in Table 2, entry 4

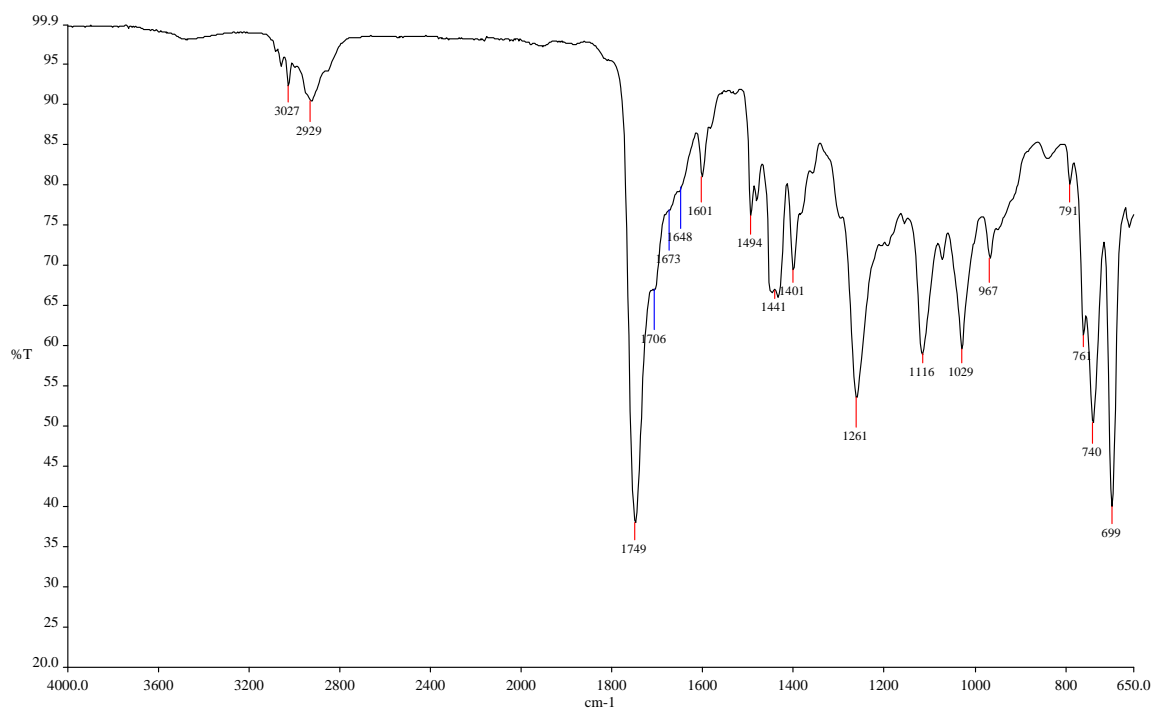

**Figure 24.**IR spectrum of crude obtained in conditions described in Table 2, entry 5

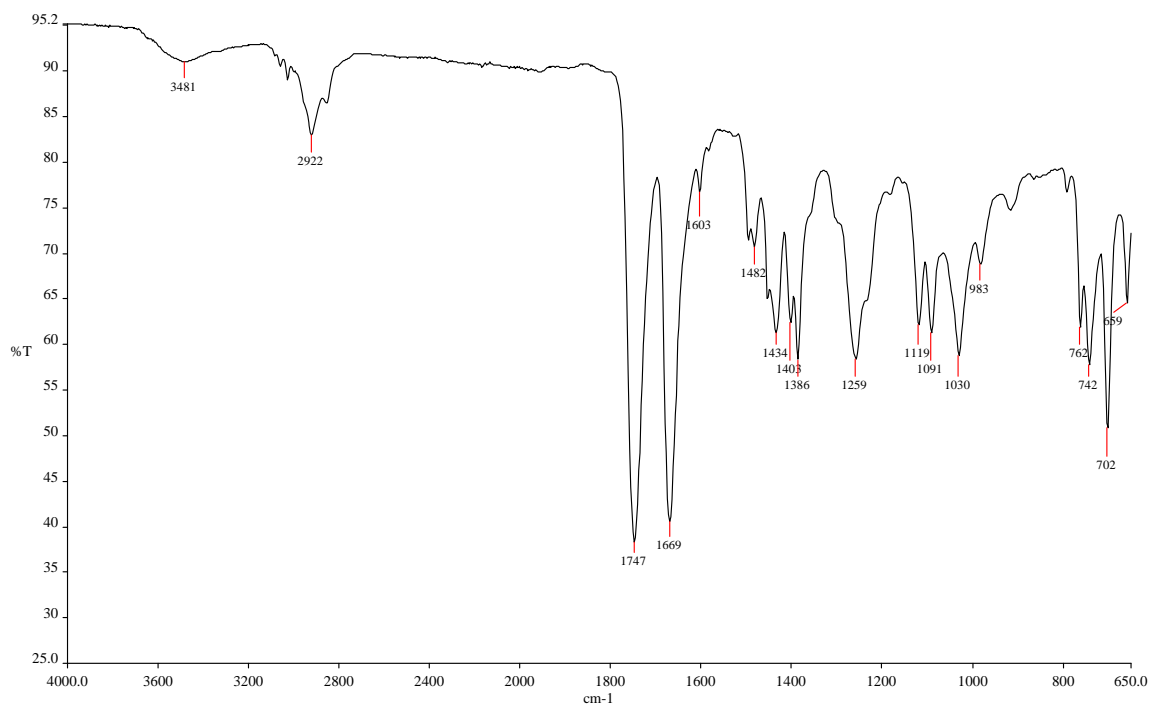

**Figure 25:** IR spectrum of crude obtained in conditions described in Table 2, entry 6

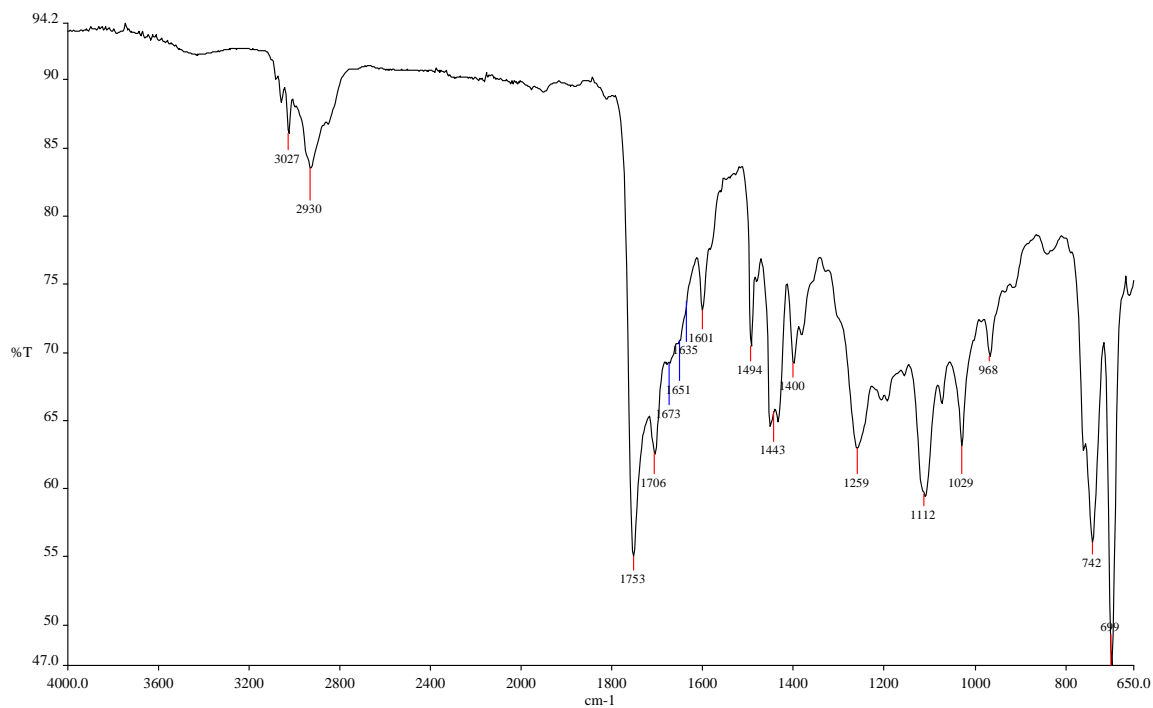

**Figure 26:** IR spectrum of crude obtained in conditions described in Table 2, entry 7

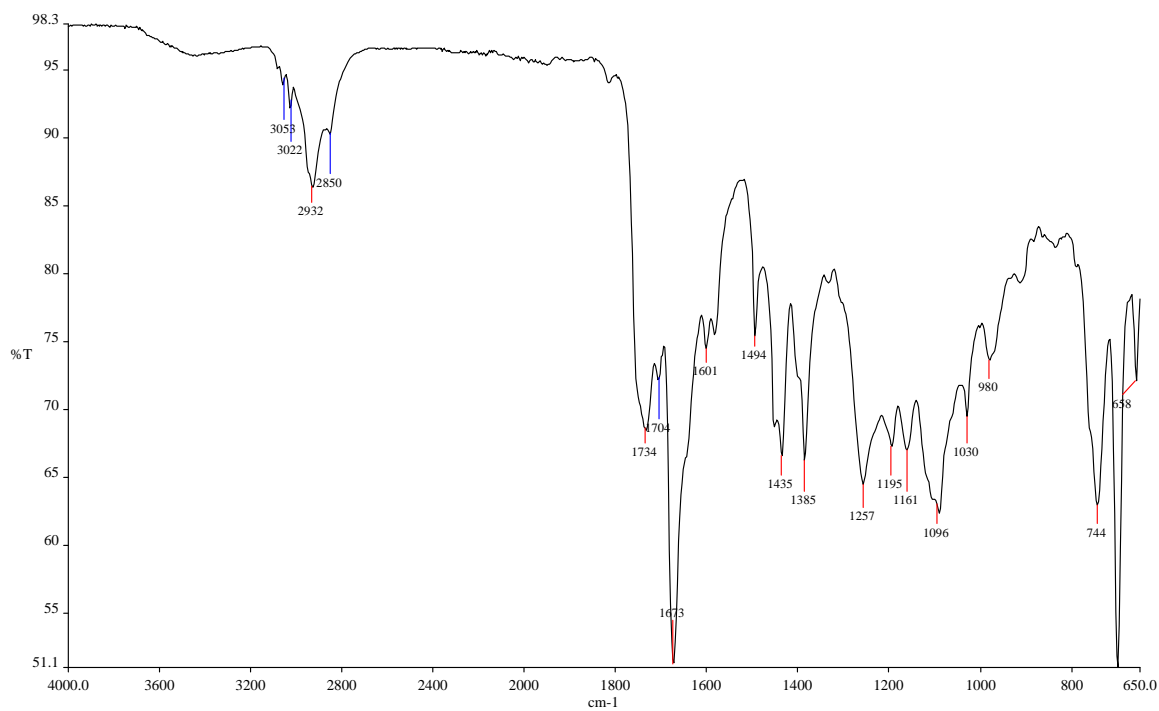

**Figure 27:** IR spectrum of crude obtained in conditions described in Table 2, entry 8

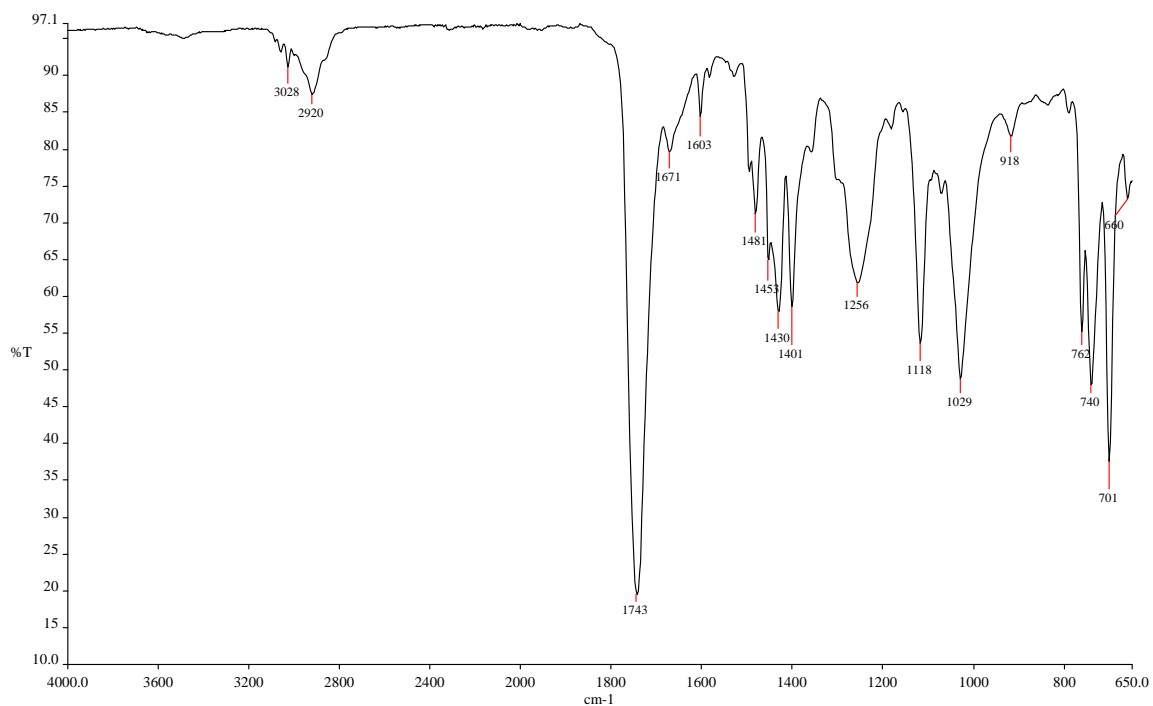

**Figure 28:** IR spectrum of crude obtained in conditions described Table 2, entry 9

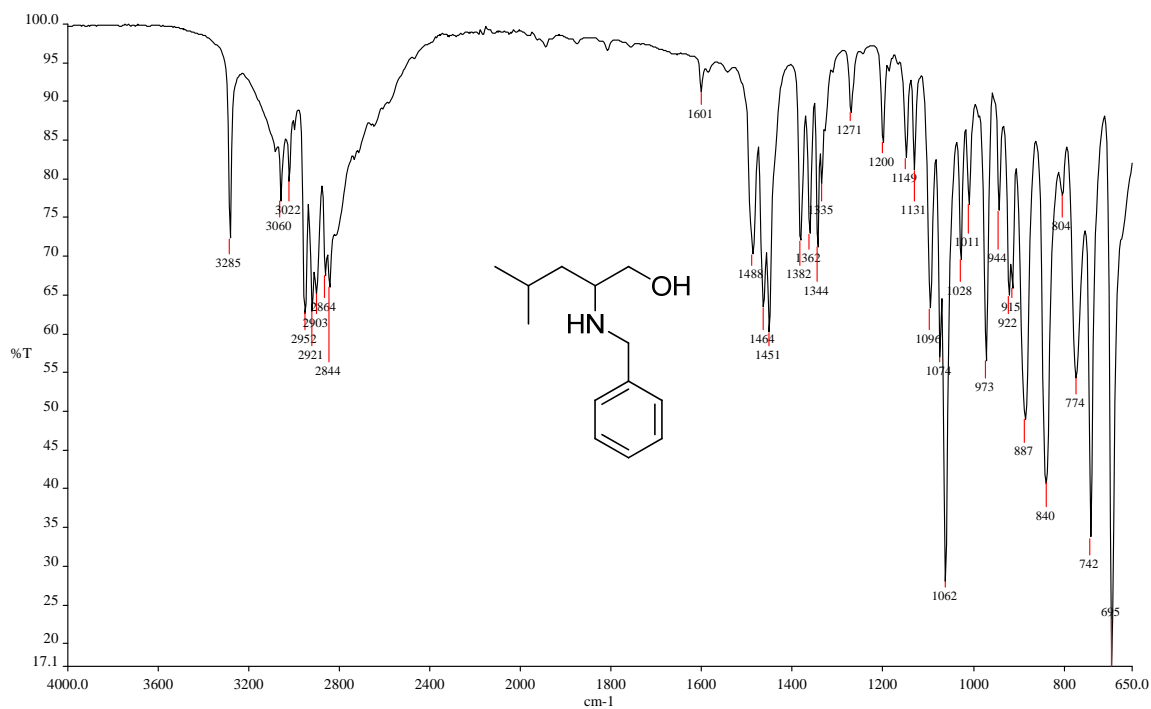

**Figure 29:** IR spectrum of 2-(benzylamino)-4-methylpentan-1-ol (**18**)

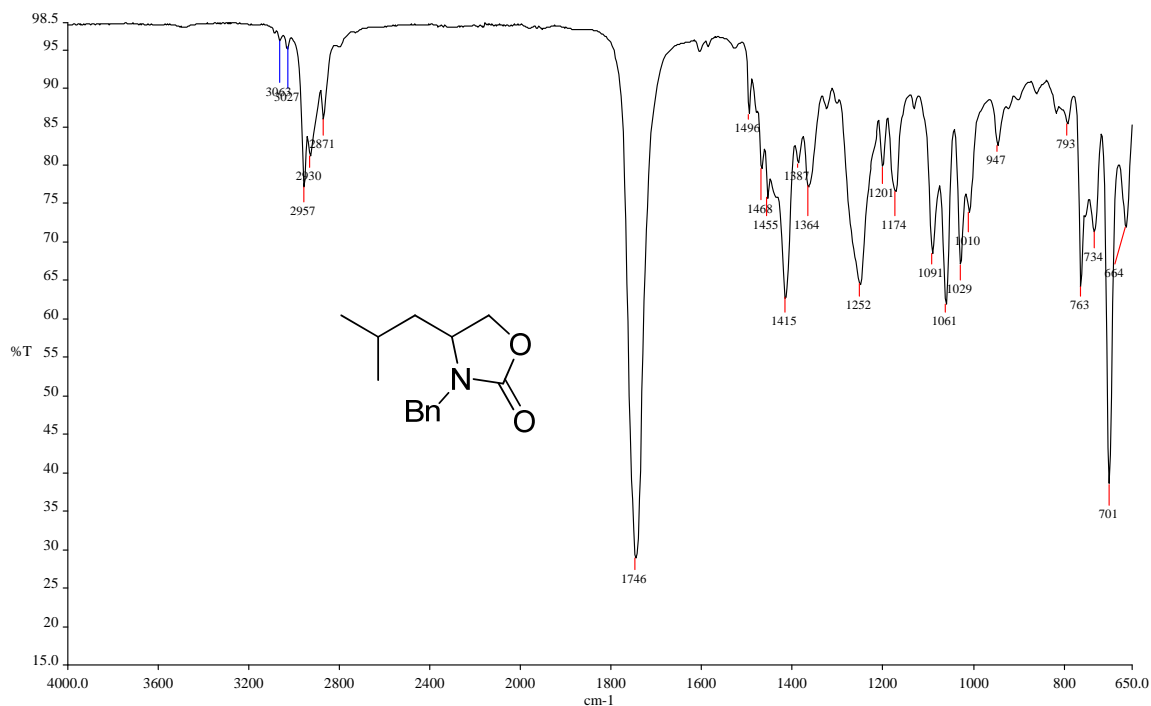

**Figure 30:** IR spectrum of crude obtained in conditions described in Table 2, entry 10

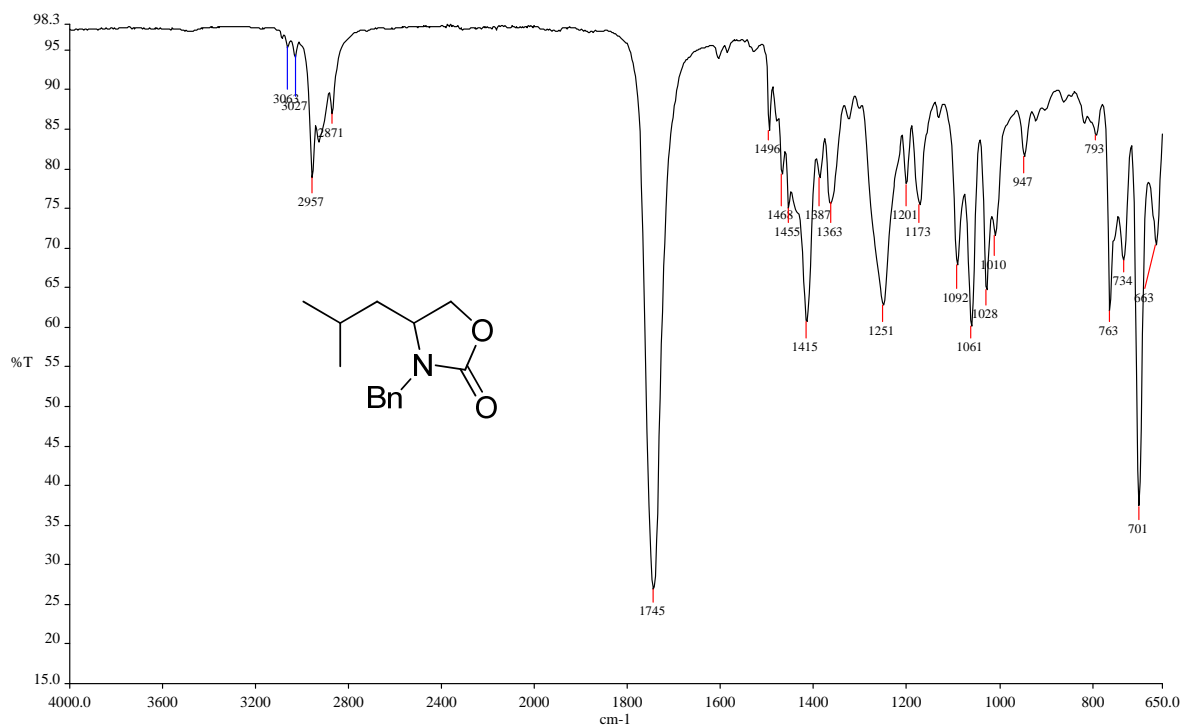

**Figure 31:** IR spectrum of crude obtained in conditions described in Table 2, entry 11



File :C:\MSDCHEM\1\DATA\OCHOA\Snapshot\ADRIAN72.d  
Operator : D. CHAVEZ  
Acquired : 12 Aug 2014 13:43 using AcqMethod VOLATILESPESADOS.M  
Instrument : Numero 1  
Sample Name: TETRABUTILAMINA  
Misc Info :  
Vial Number: 5

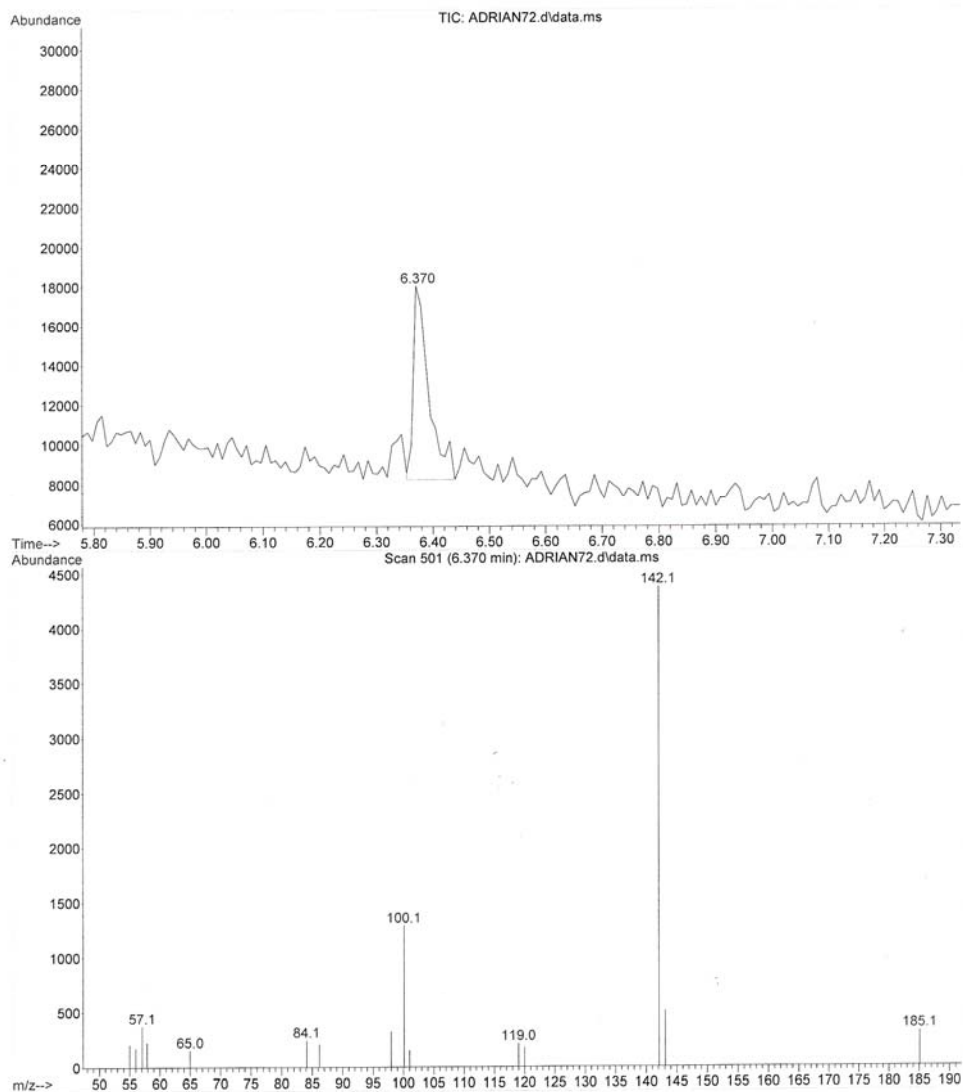

**Figure 32:**GC-MS of TBAC in solution (part 1).

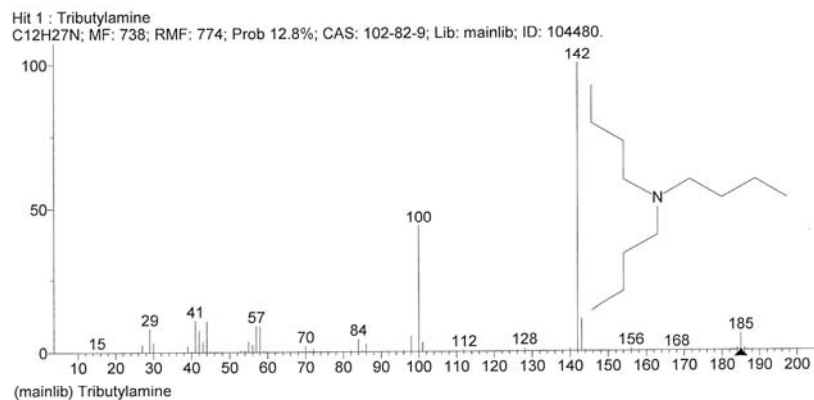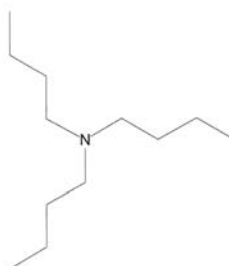

Name: Tributylamine  
 Formula: C<sub>12</sub>H<sub>27</sub>N  
 MW: 185 CAS#: 102-82-9 NIST#: 291265 ID#: 104480 DB: mainlib  
 Other DBs: Fine, TSCA, RTECS, HODOC, EINECS, IRDB  
 Contributor: NIST Mass Spectrometry Data Center, 1998.  
 10 largest peaks:  
 142 999 | 100 435 | 143 112 | 41 110 | 44 107 | 57 91 | 58 90 | 29 82 | 42 75 | 185 58 |  
 Synonyms:  
 1.1-Butanamine, N,N-dibutyl-  
 2.Tri-n-butylamine  
 3.Tris[N-butylamine]  
 4.(n-C<sub>4</sub>H<sub>9</sub>)<sub>3</sub>N  
 5.Tributylamina  
 6.UN 2542  
 7.N,N-Dibutyl-1-butanamine #

**Figure 33:**GC-MS of TBAC in solution (part 2).

File : C:\MSDCHEM\1\DATA\OCHOA\Snapshot\ADRIAN73.d  
 Operator : D. CHAVEZ  
 Acquired : 12 Aug 2014 14:19 using AcqMethod VOLATILESPESADOS.M  
 Instrument : Numero 1  
 Sample Name: DET. DE ACETATO DE ETILO  
 Misc Info :  
 Vial Number: 4

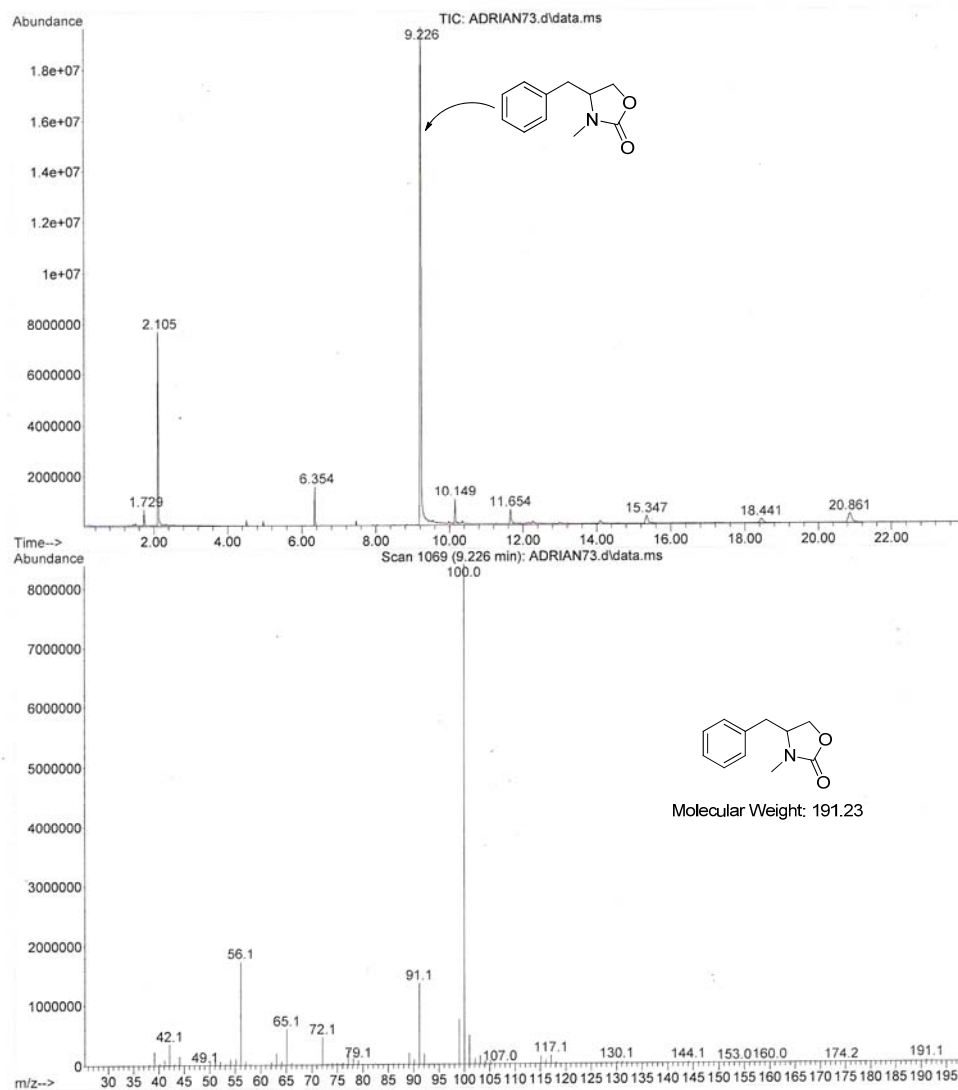

**Figure 34:**GC-MS of the crude of reaction obtained in conditions described in Table 2, entry 4 (part 1)

File :C:\MSDCHEM\1\DATA\OCHOA\Snapshot\ADRIAN73.d  
Operator : D. CHAVEZ  
Acquired : 12 Aug 2014 14:19 using AcqMethod VOLATILESPESADOS.M  
Instrument : Numero 1  
Sample Name: DET. DE ACETATO DE ETILO  
Misc Info :  
Vial Number: 4

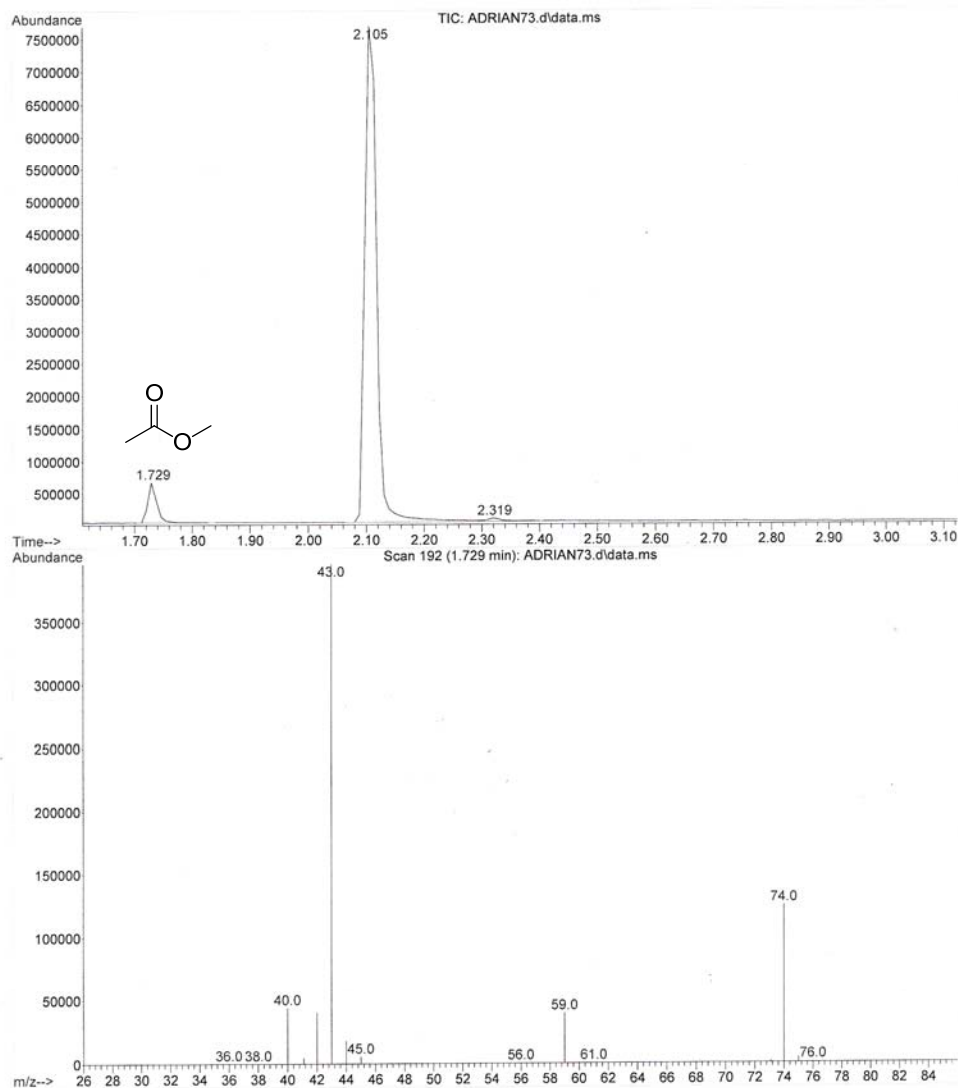

**Figure 35:**GC-MS of the crude of reaction obtained in conditions described in Table 2, entry 4 (part 2)

Hit 1 : Acetic acid, methyl ester  
 C3H6O2; MF: 903; RMF: 929; Prob 86.0%; CAS: 79-20-9; Lib: replib; ID: 2573.

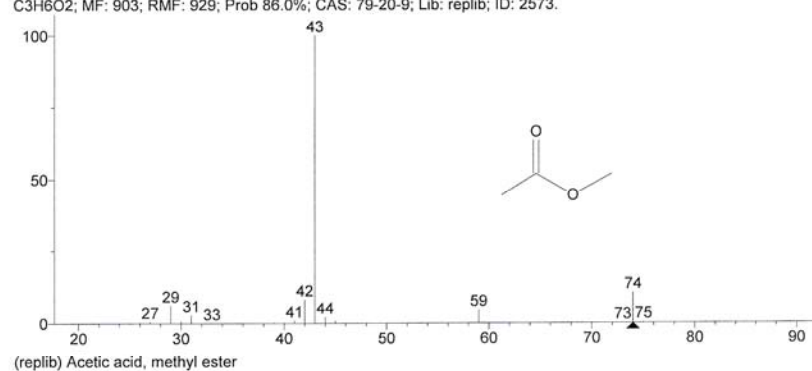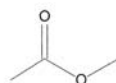

Name: Acetic acid, methyl ester  
 Formula: C<sub>3</sub>H<sub>6</sub>O<sub>2</sub>  
 MW: 74 CAS#: 79-20-9 NIST#: 154747 ID#: 2573 DB: replib  
 Other DBs: Fine, TSCA, RTECS, HODOC, NIH, EINECS, IRDB  
 Contributor: Chemical Concepts  
 10 largest peaks:  
 43 999 | 74 105 | 42 82 | 29 62 | 59 46 | 31 29 | 44 22 | 41 9 | 30 8 | 45 8 |  
 Synonyms:  
 1.Methyl acetate  
 2.Devoton  
 3.Tereton  
 4.CH<sub>3</sub>COOCH<sub>3</sub>  
 5.Methyl ethanoate  
 6.Acetate de methyle  
 7.Methyl acetic ester  
 8.Methylacetaat

Page 1 of 2

**Figure 36:**GC-MS of the crude of reaction obtained in conditions described in Table 2, entry 4 (part 3)

File :C:\MSDCHEM\1\DATA\OCHOA\Snapshot\ADRIAN73.d  
 Operator : D. CHAVEZ  
 Acquired : 12 Aug 2014 14:19 using AcqMethod VOLATILESPESADOS.M  
 Instrument : Numero 1  
 Sample Name: DET. DE ACETATO DE ETILO  
 Misc Info :  
 Vial Number: 4

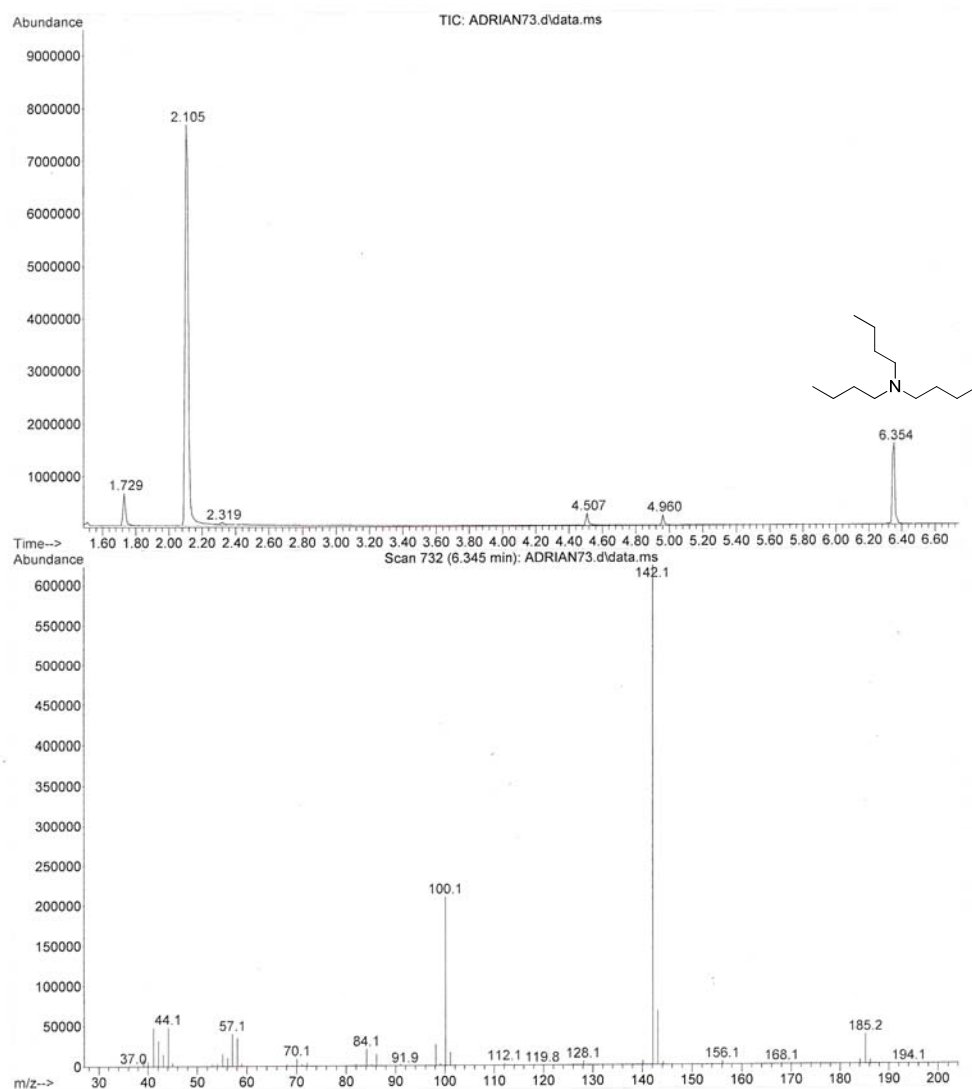

**Figure 37:**GC-MS of the crude of reaction obtained in conditions described in Table 2, entry 4 (part 4)

Hit 1 : Tributylamine  
 C<sub>12</sub>H<sub>27</sub>N; MF: 933; RMF: 935; Prob 82.8%; CAS: 102-82-9; Lib: mainlib; ID: 104480.

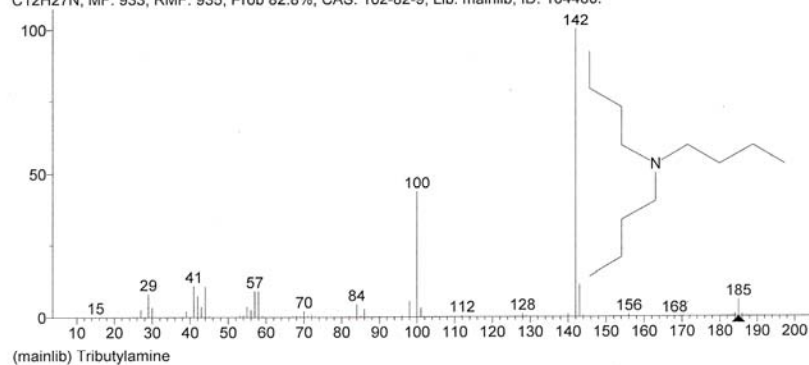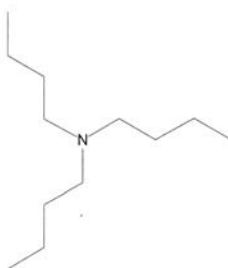

Name: Tributylamine  
 Formula: C<sub>12</sub>H<sub>27</sub>N  
 MW: 185 CAS#: 102-82-9 NIST#: 291265 ID#: 104480 DB: mainlib  
 Other DBs: Fine, TSCA, RTECS, HODOC, EINECS, IRDB  
 Contributor: NIST Mass Spectrometry Data Center, 1998.  
 10 largest peaks:  
 142 999 | 100 435 | 143 112 | 41 110 | 44 107 | 57 91 | 58 90 | 29 82 | 42 75 | 185 58 |  
 Synonyms:  
 1.1-Butanamine, N,N-dibutyl-  
 2.Tri-n-butylamine  
 3.Tris[N-butylamine]  
 4.(n-C<sub>4</sub>H<sub>9</sub>)<sub>3</sub>N  
 5.Tributylamina  
 6.UN 2542  
 7.N,N-Dibutyl-1-butanamine #

Page 1 of 1

**Figure 38:**GC-MS of the crude of reaction obtained in conditions described in Table 2, entry 4 (part 5)

File :C:\msdchem\1\data\OCHOA\ADRIAN73.D  
Operator : D. CHAVEZ  
Acquired : 12 Aug 2014 14:19 using AcqMethod VOLATILESPESADOS.M  
Instrument : Numero 1  
Sample Name: DET. DE ACETATO DE ETILO  
Misc Info :  
Vial Number: 4

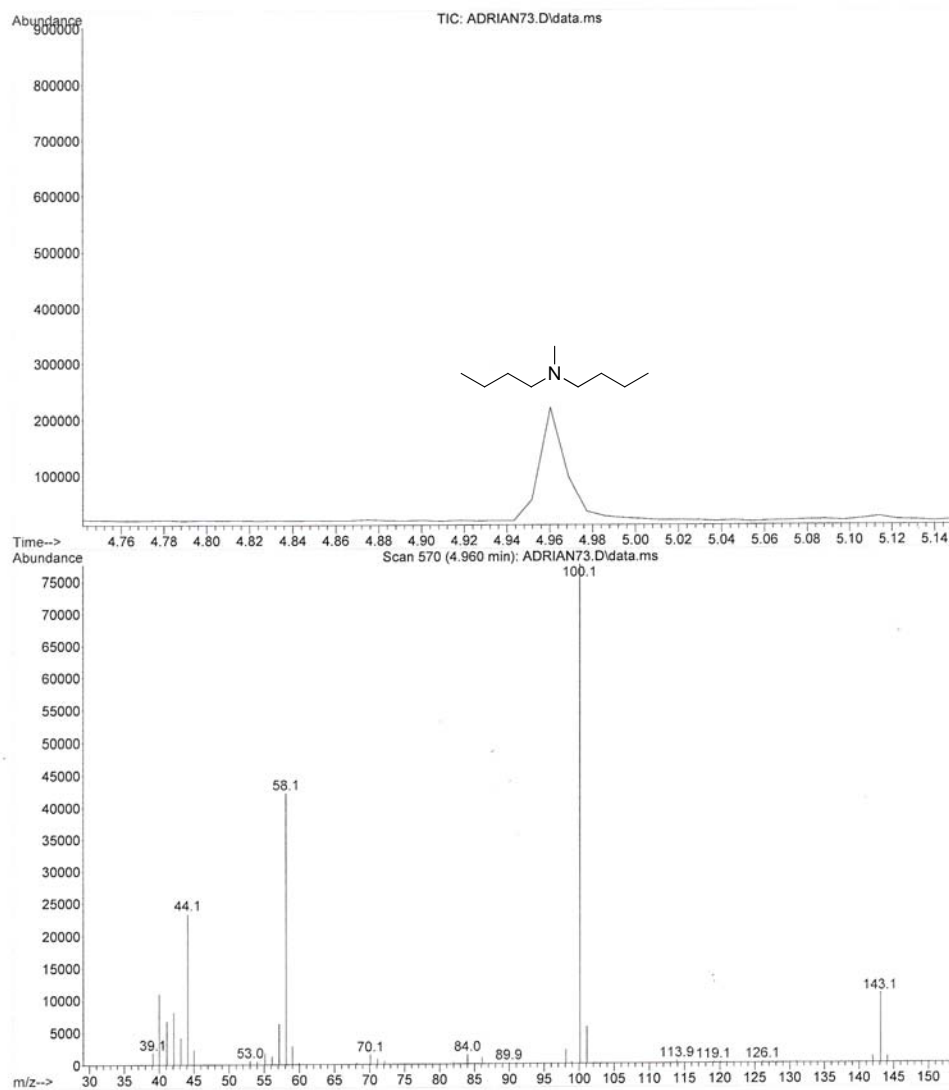

**Figure 39:**GC-MS of the crude of reaction obtained in conditions described in Table 2, entry 4 (part 6)



Hit 1 : 1-Butanamine, N-butyl-N-methyl-  
 C<sub>9</sub>H<sub>21</sub>N; MF: 836; RMF: 866; Prob 67.0%; CAS: 3405-45-6; Lib: mainlib; ID: 62561.

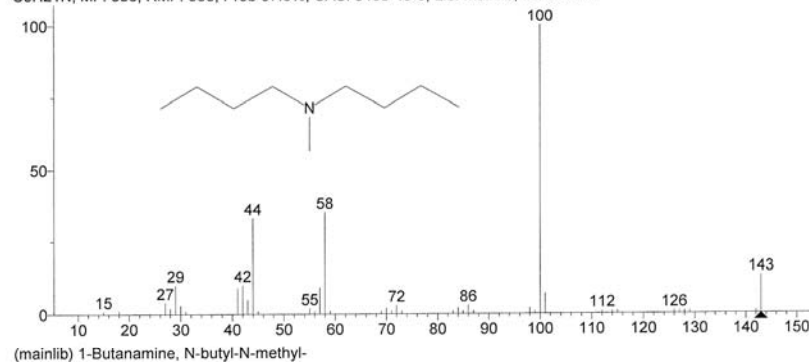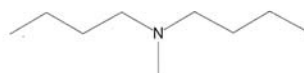

Name: 1-Butanamine, N-butyl-N-methyl-  
 Formula: C<sub>9</sub>H<sub>21</sub>N  
 MW: 143 CAS#: 3405-45-6 NIST#: 46649 ID#: 62561 DB: mainlib  
 Other DBs: Fine, TSCA, RTECS, EINECS  
 Contributor: CARL DJERASSI DEPT OF CHEM STANFORD UNIV STANFORD CALIF 94305  
 10 largest peaks:  
 100 999 | 58 350 | 44 330 | 143 130 | 29 100 | 42 100 | 41 90 | 57 90 | 101 70 | 43 50 |  
 Synonyms:  
 1. Dibutylamine, N-methyl-  
 2. Methanamine, N,N-dibutyl-  
 3. Methyl dibutylamine  
 4. N-Methyl dibutylamine  
 5. N,N-Dibutylmethylamine  
 6. di-n-Butylmethylamine  
 7. Methyl di-n-butylamine  
 8. N,N-di-n-Butylmethylamine

Page 1 of 2

**Figure 40:** GC-MS of the crude of reaction obtained in conditions described in Table 2, entry 4 (part 7)

File :C:\MSDCHEM\1\DATA\OCHOA\Snapshot\ADRIAN74.d  
 Operator : D. CHAVEZ  
 Acquired : 12 Aug 2014 14:58 using AcqMethod VOLATILESPESADOS.M  
 Instrument : Numero 1  
 Sample Name: REACCION 14  
 Misc Info : DET. DE ACETATO DE ETILO  
 Vial Number: 6

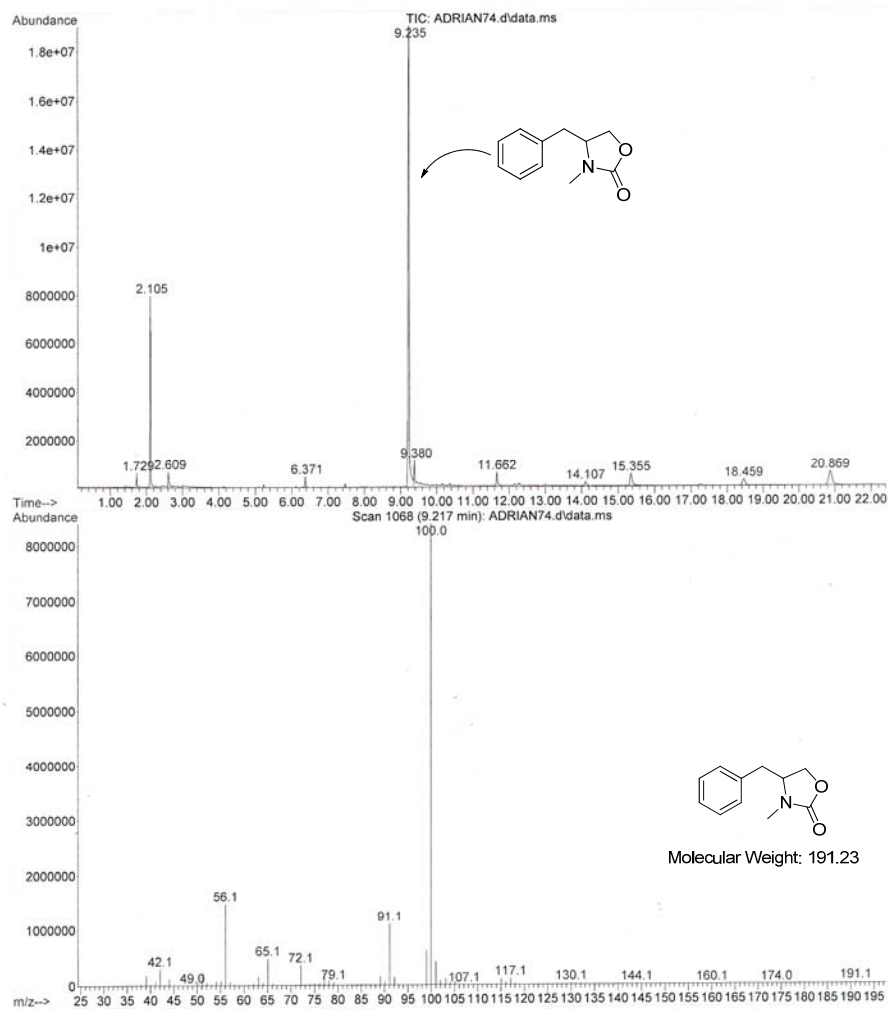

**Figure 41:**GC-MS of the crude of reaction obtained in conditions described in Table 2, entry 9 (part 1)

File :C:\MSDCHEM\1\DATA\OCHOA\Snapshot\ADRIAN74.d  
 Operator : D. CHAVEZ  
 Acquired : 12 Aug 2014 14:58 using AcqMethod VOLATILESPESADOS.M  
 Instrument : Numero 1  
 Sample Name: REACCION 14  
 Misc Info : DET. DE ACETATO DE ETILO  
 Vial Number: 6

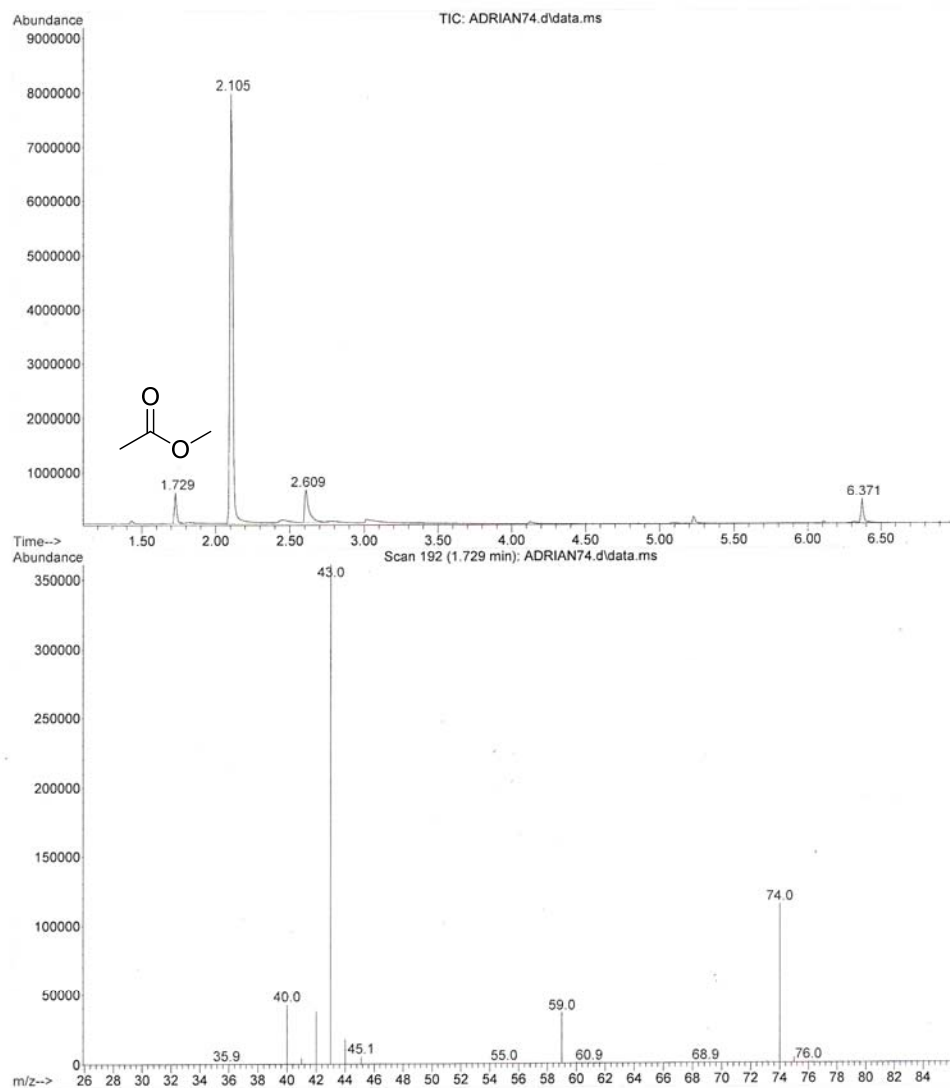

**Figure 42:**GC-MS of the crude of reaction obtained in conditions described in Table 2, entry 9 (part 2)

Hit 1 : Acetic acid, methyl ester  
 C3H6O2; MF: 907; RMF: 937; Prob 86.3%; CAS: 79-20-9; Lib: replib; ID: 2569.

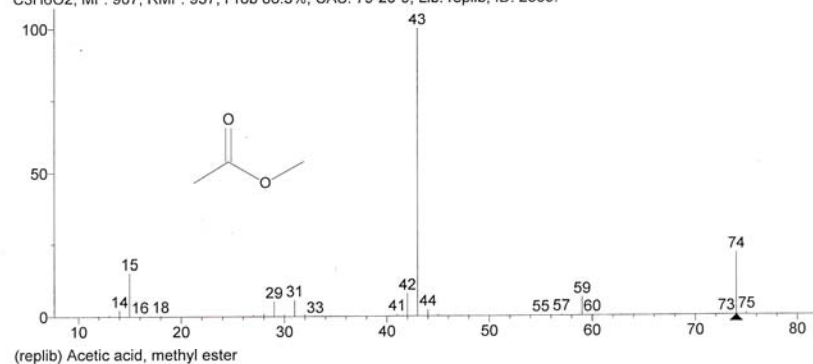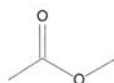

Name: Acetic acid, methyl ester  
 Formula: C<sub>3</sub>H<sub>6</sub>O<sub>2</sub>  
 MW: 74 CAS#: 79-20-9 NIST#: 229449 ID#: 2569 DB: replib  
 Other DBs: Fine, TSCA, RTECS, HODOC, NIH, EINECS, IRDB  
 Contributor: Japan AIST/NIMC Database- Spectrum MS-NW- 27  
 10 largest peaks:  
 43 999 | 74 214 | 15 150 | 42 79 | 59 64 | 31 57 | 29 52 | 44 23 | 14 21 | 28 10 |  
 Synonyms:  
 1.Methyl acetate  
 2.Devoton  
 3.Tereton  
 4.CH<sub>3</sub>COOCH<sub>3</sub>  
 5.Methyl ethanoate  
 6.Acetate de methyle  
 7.Methyl acetic ester  
 8.Methylacetaat

Page 1 of 2

**Figure 43:**GC-MS of the crude of reaction obtained in conditions described in Table 2, entry 9 (part 3)

File :C:\MSDCHEM\1\DATA\OCHOA\Snapshot\ADRIAN74.d  
Operator : D. CHAVEZ  
Acquired : 12 Aug 2014 14:58 using AcqMethod VOLATILESPESADOS.M  
Instrument : Numero 1  
Sample Name: REACCION 14  
Misc Info : DET. DE ACETATO DE ETILO  
Vial Number: 6

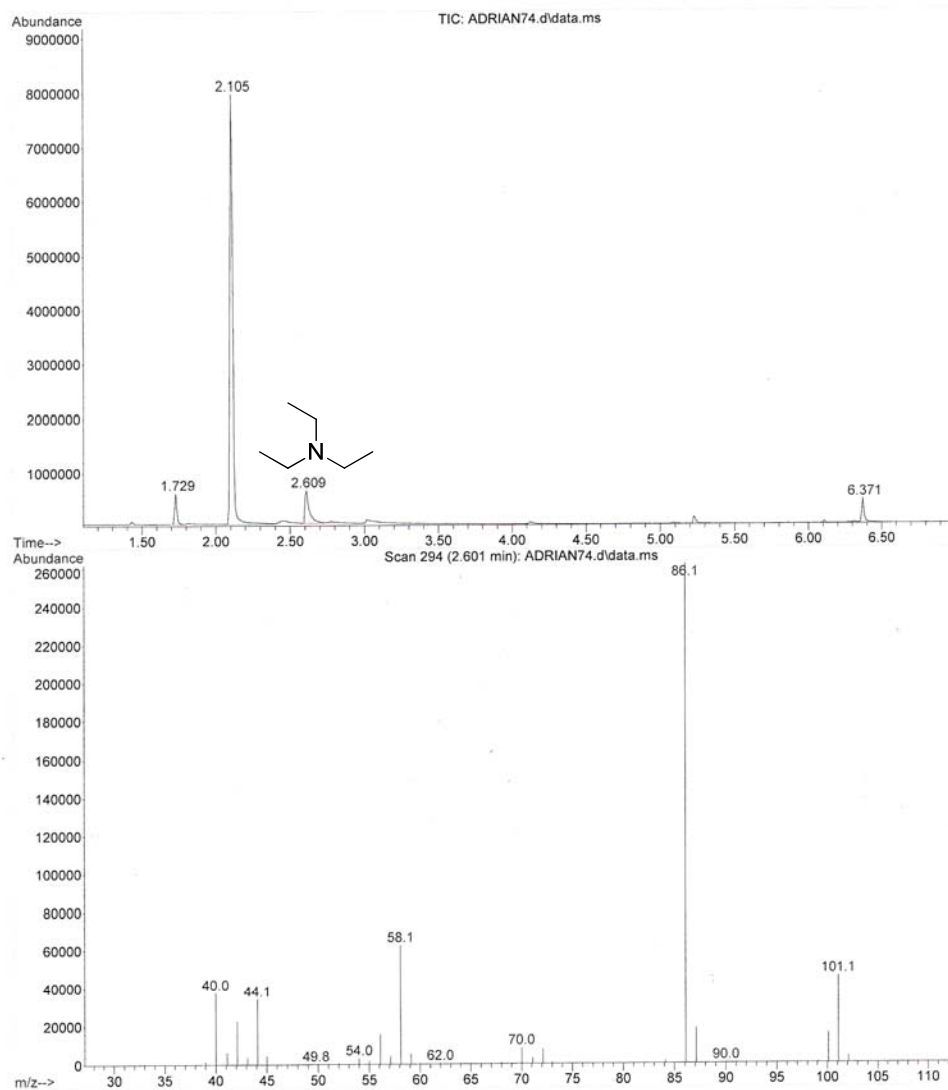

**Figure 44:**GC-MS of the crude of reaction obtained in conditions described in Table 2, entry 9 (part 4)

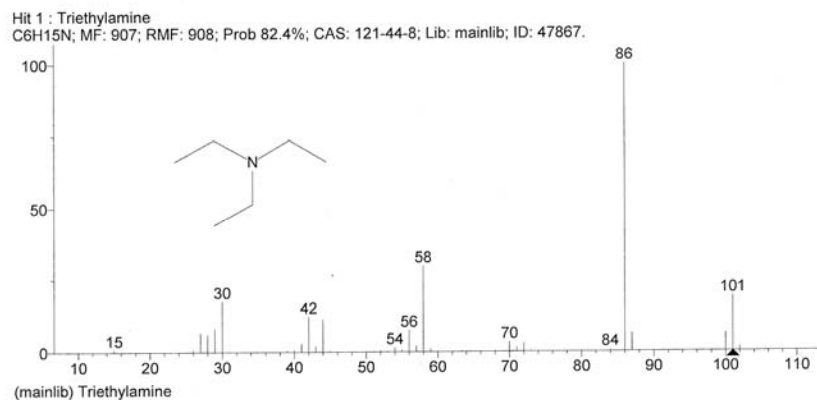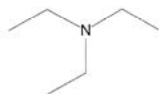

Name: Triethylamine  
 Formula: C<sub>6</sub>H<sub>15</sub>N  
 MW: 101 CAS#: 121-44-8 NIST#: 291545 ID#: 47867 DB: mainlib  
 Other DBs: Fine, TSCA, RTECS, EPA, HODOC, EINECS, IRDB  
 Contributor: NIST Mass Spectrometry Data Center, 1998.  
 10 largest peaks:  
 86 999 | 58 296 | 101 188 | 30 174 | 42 121 | 44 113 | 29 82 | 56 75 | 27 66 | 87 63 |  
 Synonyms:  
 1.Ethanamine, N,N-diethyl-  
 2.(C<sub>2</sub>H<sub>5</sub>)<sub>3</sub>N  
 3.(Diethylamino)ethane  
 4.N,N-Diethylethanamine  
 5.TEN  
 6.Triaethylamin  
 7.Trietilamina  
 8.UN 1296

Page 1 of 2

**Figure 45:**GC-MS of the crude of reaction obtained in conditions described in Table 2, entry 9 (part 5)

File :C:\msdchem\1\data\OCHOA\ADRIAN74.D  
 Operator : D. CHAVEZ  
 Acquired : 12 Aug 2014 14:58 using AcqMethod VOLATILESPESADOS.M  
 Instrument : Numero 1  
 Sample Name: REACCION 14  
 Misc Info : DET. DE ACETATO DE ETILO  
 Vial Number: 6

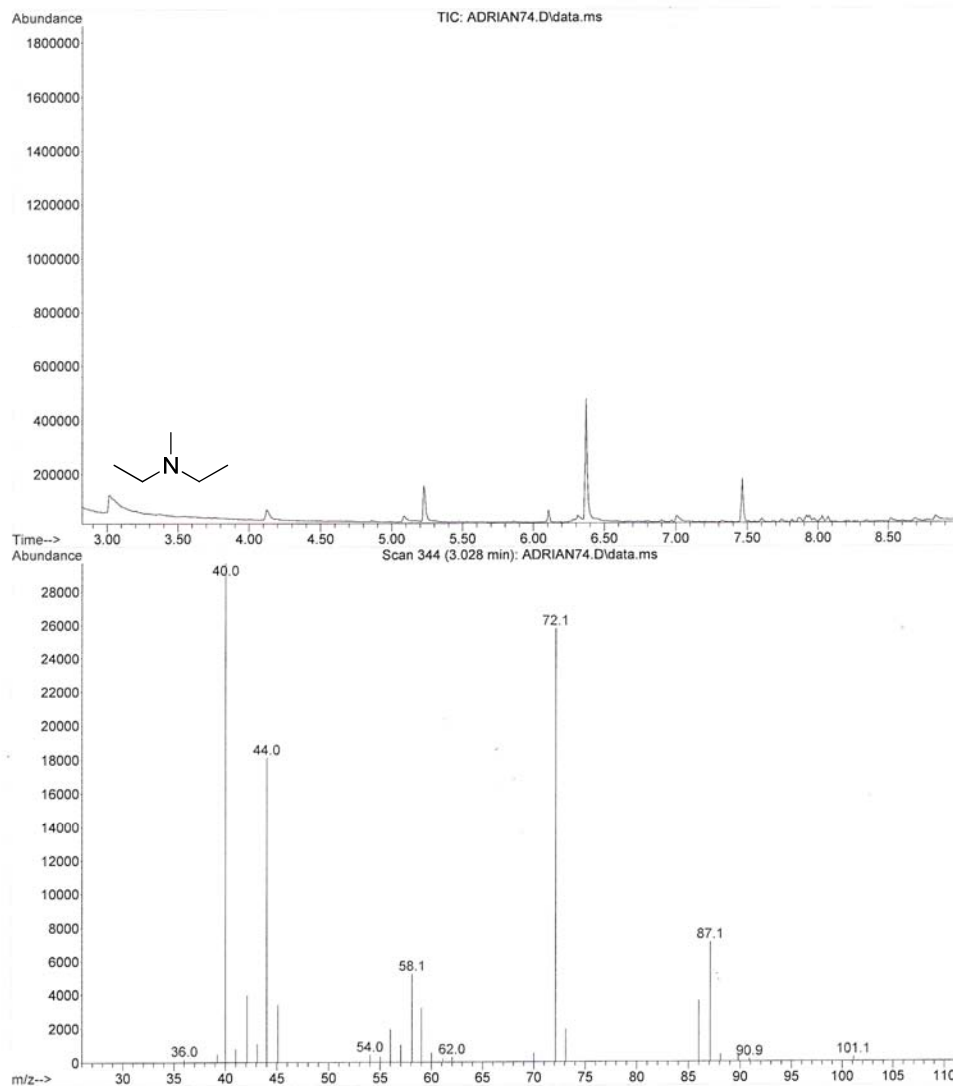

**Figure 46:**GC-MS of the crude of reaction obtained in conditions described in Table 2, entry 9 (part 6)

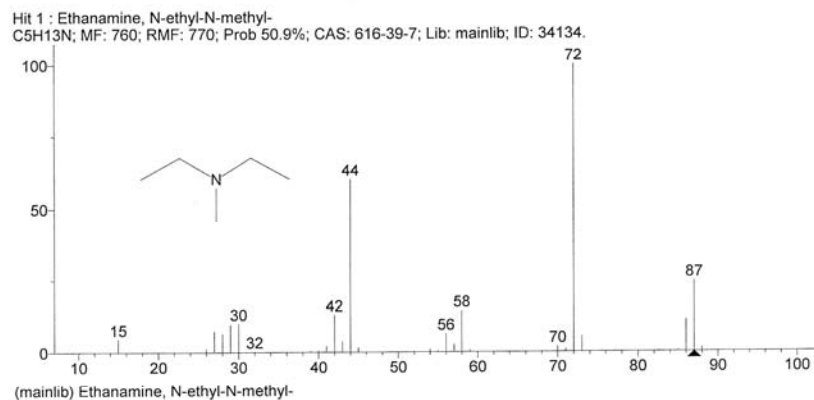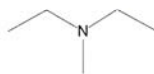

Name: Ethanamine, N-ethyl-N-methyl-  
 Formula: C<sub>5</sub>H<sub>13</sub>N  
 MW: 87 CAS#: 616-39-7 NIST#: 233768 ID#: 34134 DB: mainlib  
 Other DBs: Fine, TSCA, HODOC, EINECS  
 Contributor: Japan AIST/NIMC Database- Spectrum MS-NW-2121  
 10 largest peaks:  
 72 999 | 44 602 | 87 244 | 58 143 | 42 129 | 86 110 | 30 100 | 29 95 | 27 72 | 56 64 |  
 Synonyms:  
 1.Diethylamine, N-methyl-  
 2.Diethylmethylaniline  
 3.Methyldiethylamine  
 4.N-Methyldiethylamine  
 5.N,N-Diethylmethylaniline  
 6.(C<sub>2</sub>H<sub>5</sub>)<sub>2</sub>(CH<sub>3</sub>)N  
 7.N-Ethyl-N-methyl-ethanamine

**Figure 47:**GC-MS of the crude of reaction obtained in conditions described in Table 2, entry 9 (part 7)



File :C:\msdchem\1\data\OCHOA\ADRIAN75.D  
 Operator : D. CHAVEZ  
 Acquired : 14 Aug 2014 10:45 using AcqMethod GENERAL.M  
 Instrument : Numero 1  
 Sample Name: REACCION 12  
 Misc Info :  
 Vial Number: 2

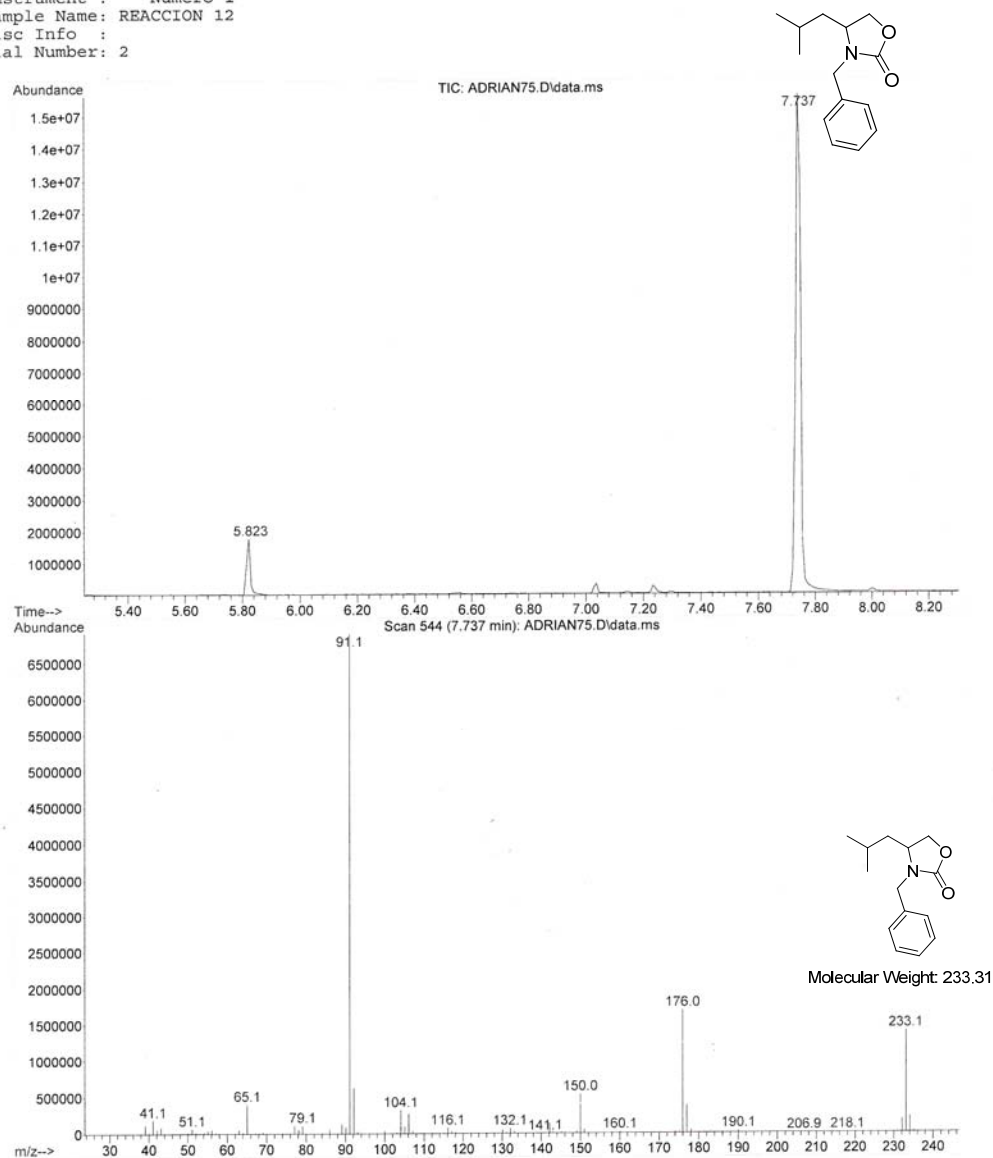

**Figure 48:**GC-MS of the crude of reaction obtained in conditions described in Table 2, entry 10 (part 1)

File :C:\msdchem\1\data\OCHOA\ADRIAN75.D  
 Operator : D. CHAVEZ  
 Acquired : 14 Aug 2014 10:45 using AcqMethod GENERAL.M  
 Instrument : Numero 1  
 Sample Name: REACCION 12  
 Misc Info :  
 Vial Number: 2

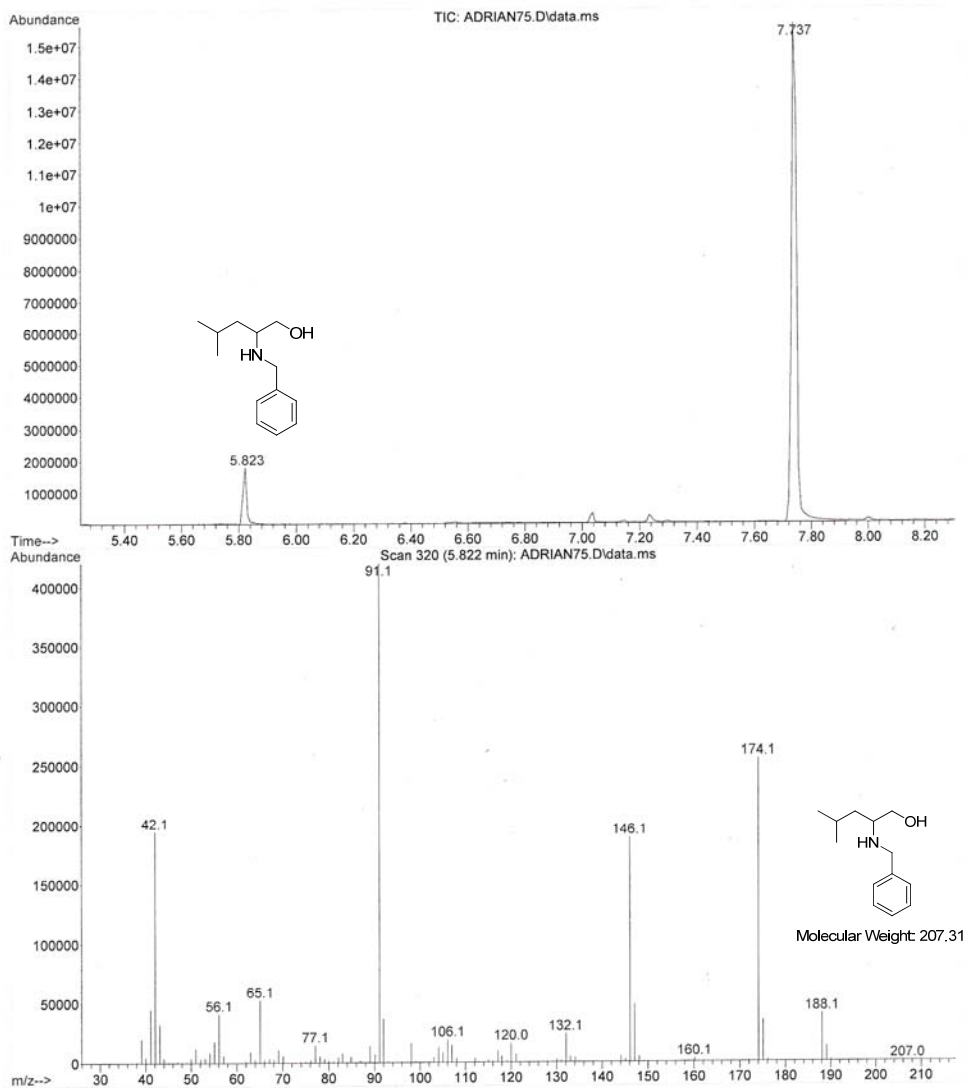

**Figure 49:**GC-MS of the crude of reaction obtained in conditions described in Table 2, entry 10 (part 2)
