# Supplementary material for: A Novel One-Pot and One-Step Microwave-Assisted Cyclization-Methylation Reaction of Amino Alcohols and Acetylated Derivatives with Dimethyl Carbonate and TBAC
Source: ScientificWorldJournal. 2014 Oct 14;2014:634935. doi: 10.1155/2014/634935 (PMC4322309; doi:10.1155/2014/634935)
Supplement: Supplementary file 1 — 1H NMR and 13C NMR spectra for representative compounds are available. Infrared spectra and GC-MS analytical data are provided. [file 634935.f1.zip]

Archive with 3 entries (2 files):
- 634935.f1/
- 634935.f1/634935.f1.pdf
- 634935.f1/634935.f2.pdf
